# Supplementary material for: Aerial ULV control of Aedes aegypti with naled (Dibrom) inside simulated rural village and urban cryptic habitats
Source: PubMed Central journal article supplement (PMC5774805; doi:10.1371/journal.pone.0191555), 2018-01-19

**SET A**

SI-S12 Figs. Naled efficacy (mortality), MOUT 29 Oct.

**Figure S1**  
 29 October 2013  
 800I nozzles  
 MOUT South  
 1 hr mortality  
 Outdoors **IN BOX**

USAF / USDA-ARS-CMAVE / NECE  
 DWFP COLLABORATIVE FIELD TRIAL  
 2013-10-29  
 CAMP BLANDING JOINT TRAINING CENTER, FL  
 MOUT VILLAGE  
 DIBROM AERIAL APPLICATION  
 AE. AEGYPTI TARGET

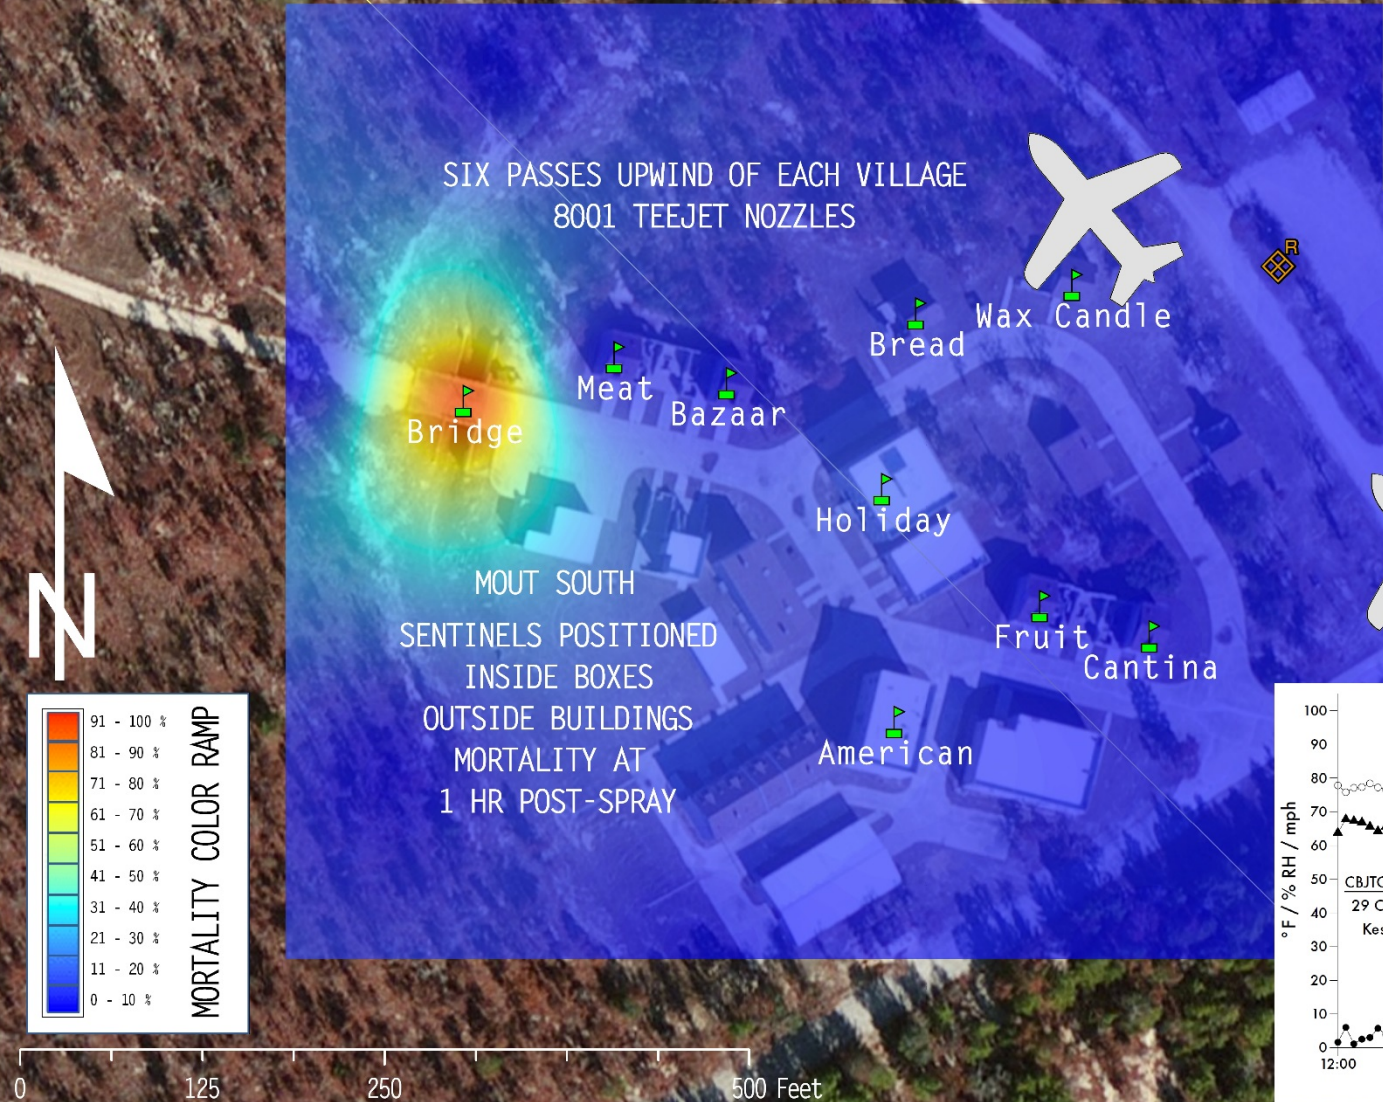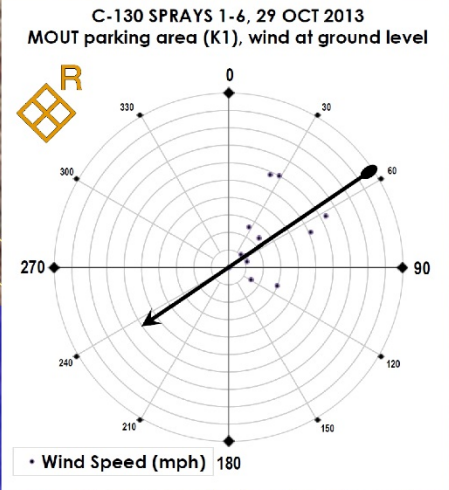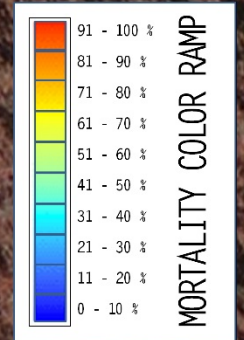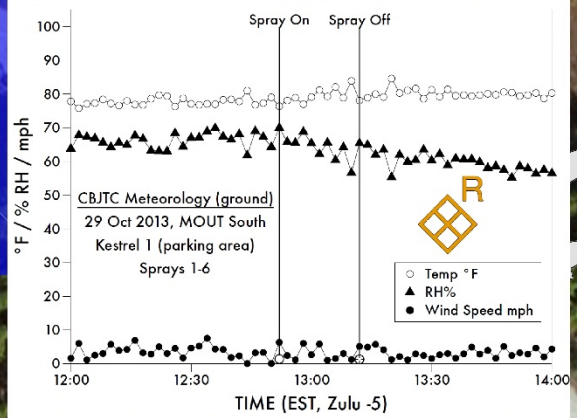

**Figure S2**  
 29 October 2013  
 800I nozzles  
 MOUT South  
 4 hr mortality  
 Outdoors **IN BOX**

USAF / USDA-ARS-CMAVE / NECE  
 DWFP COLLABORATIVE FIELD TRIAL  
 2013-10-29  
 CAMP BLANDING JOINT TRAINING CENTER, FL  
 MOUT VILLAGE  
 DIBROM AERIAL APPLICATION  
 AE. AEGYPTI TARGET

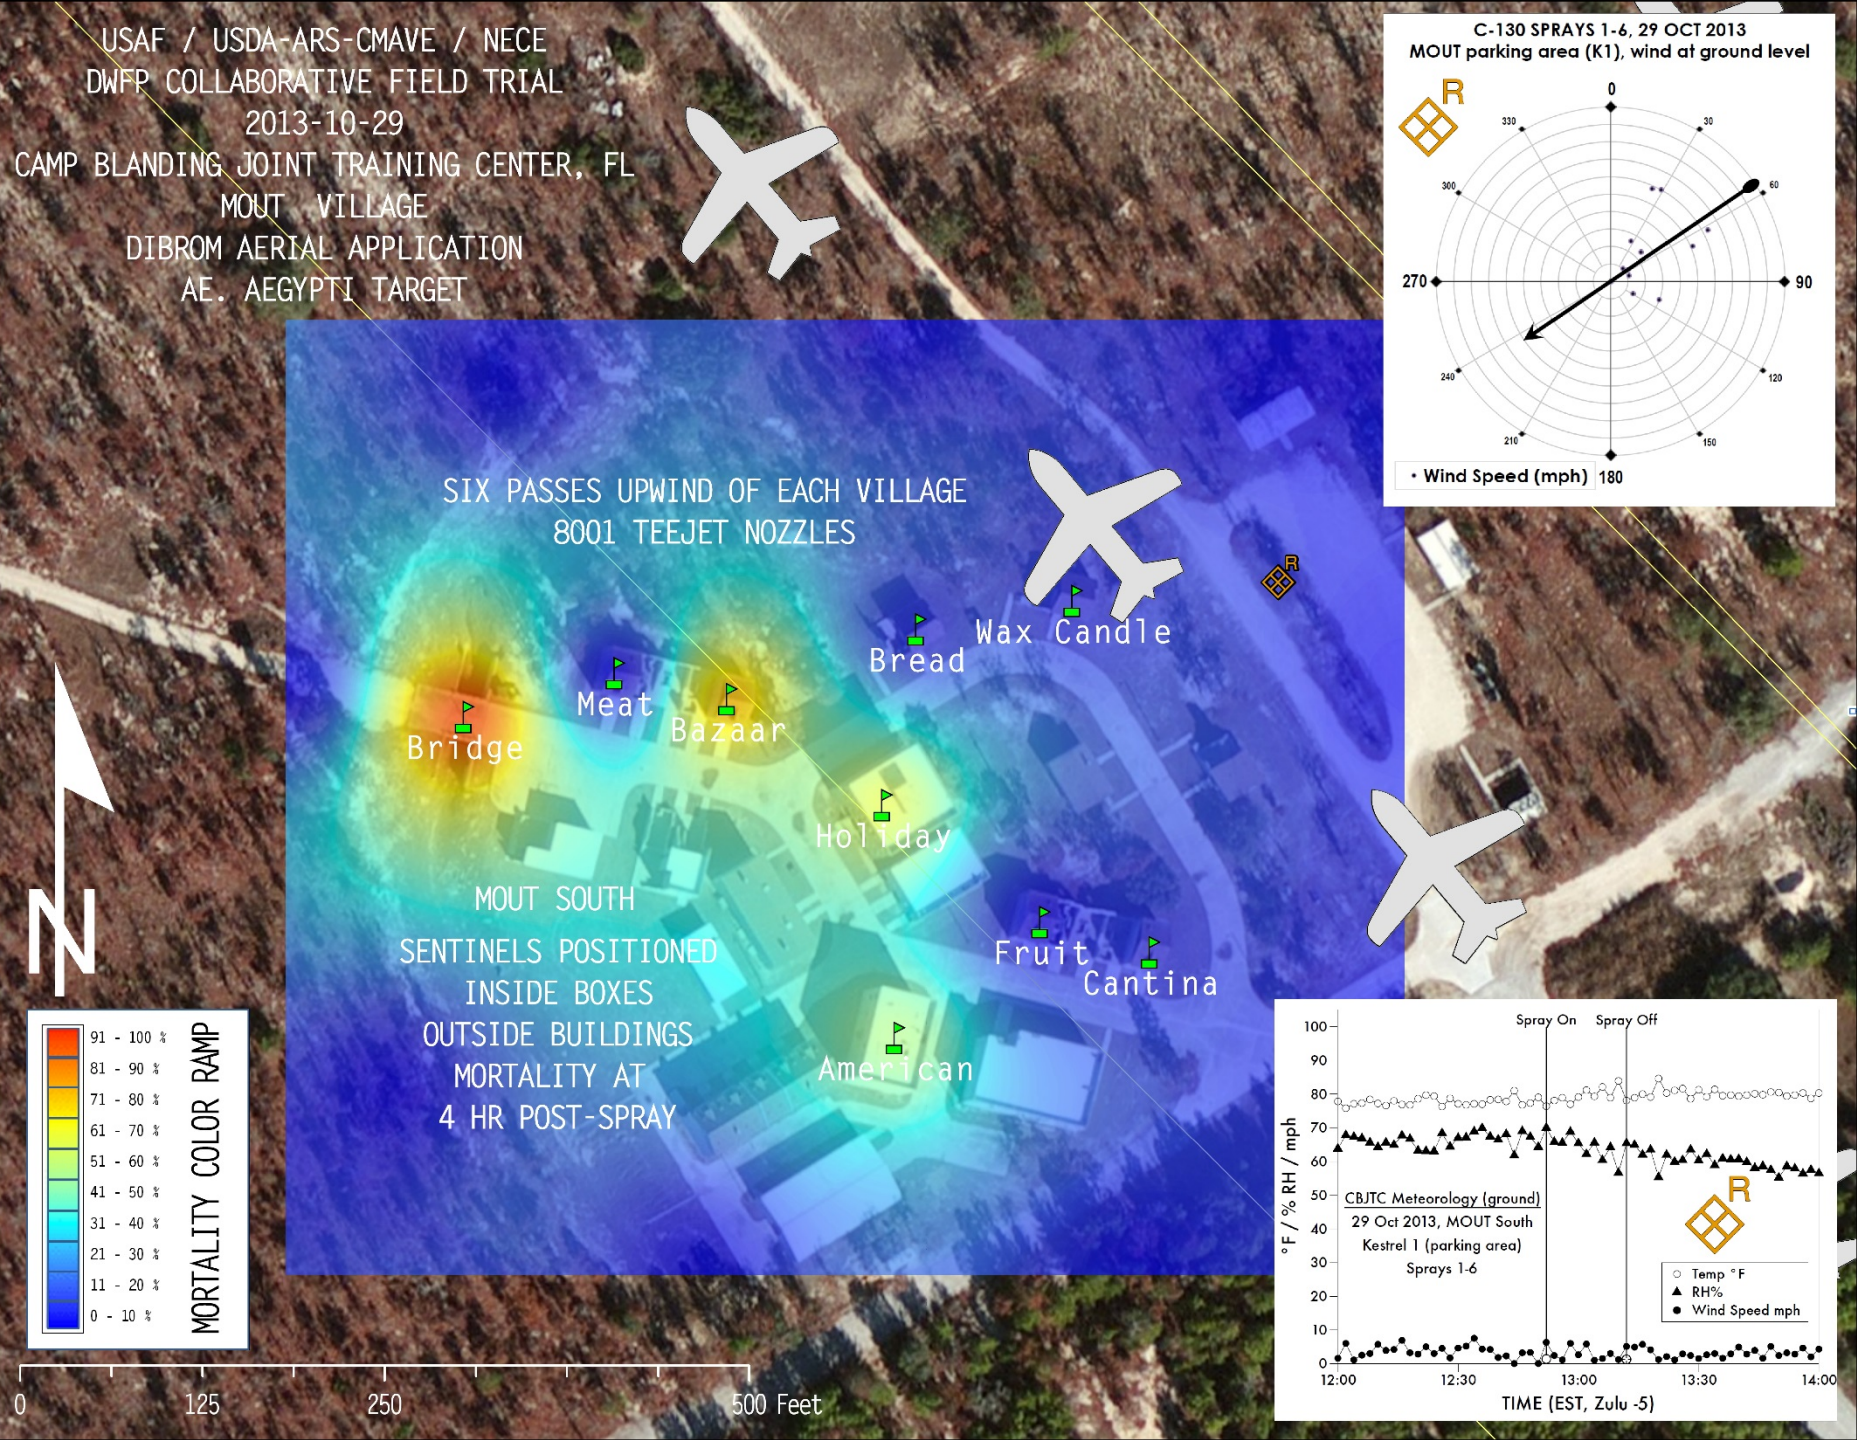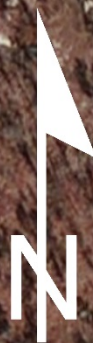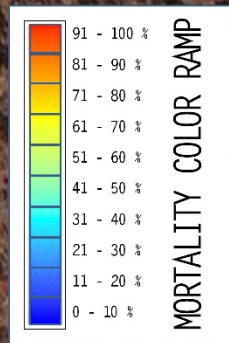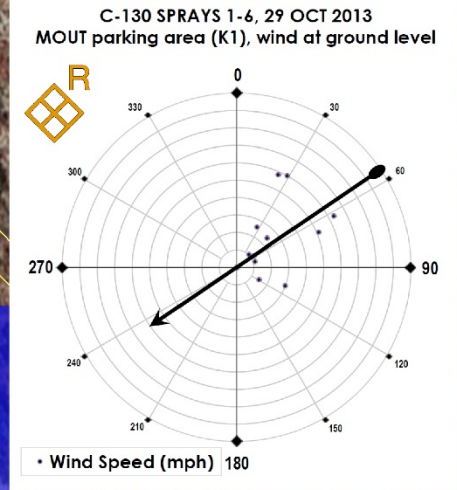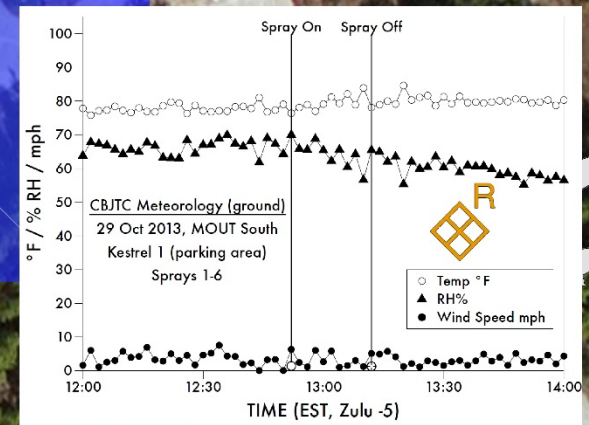

**Figure S3**  
 29 October 2013  
 8001 nozzles  
 MOUT South  
 12 hr mortality  
 Outdoors **IN BOX**

USAF / USDA-ARS-CMAVE / NECE  
 DWFP COLLABORATIVE FIELD TRIAL  
 2013-10-29  
 CAMP BLANDING JOINT TRAINING CENTER, FL  
 MOUT VILLAGE  
 DIBROM AERIAL APPLICATION  
 AE. AEGYPTI TARGET

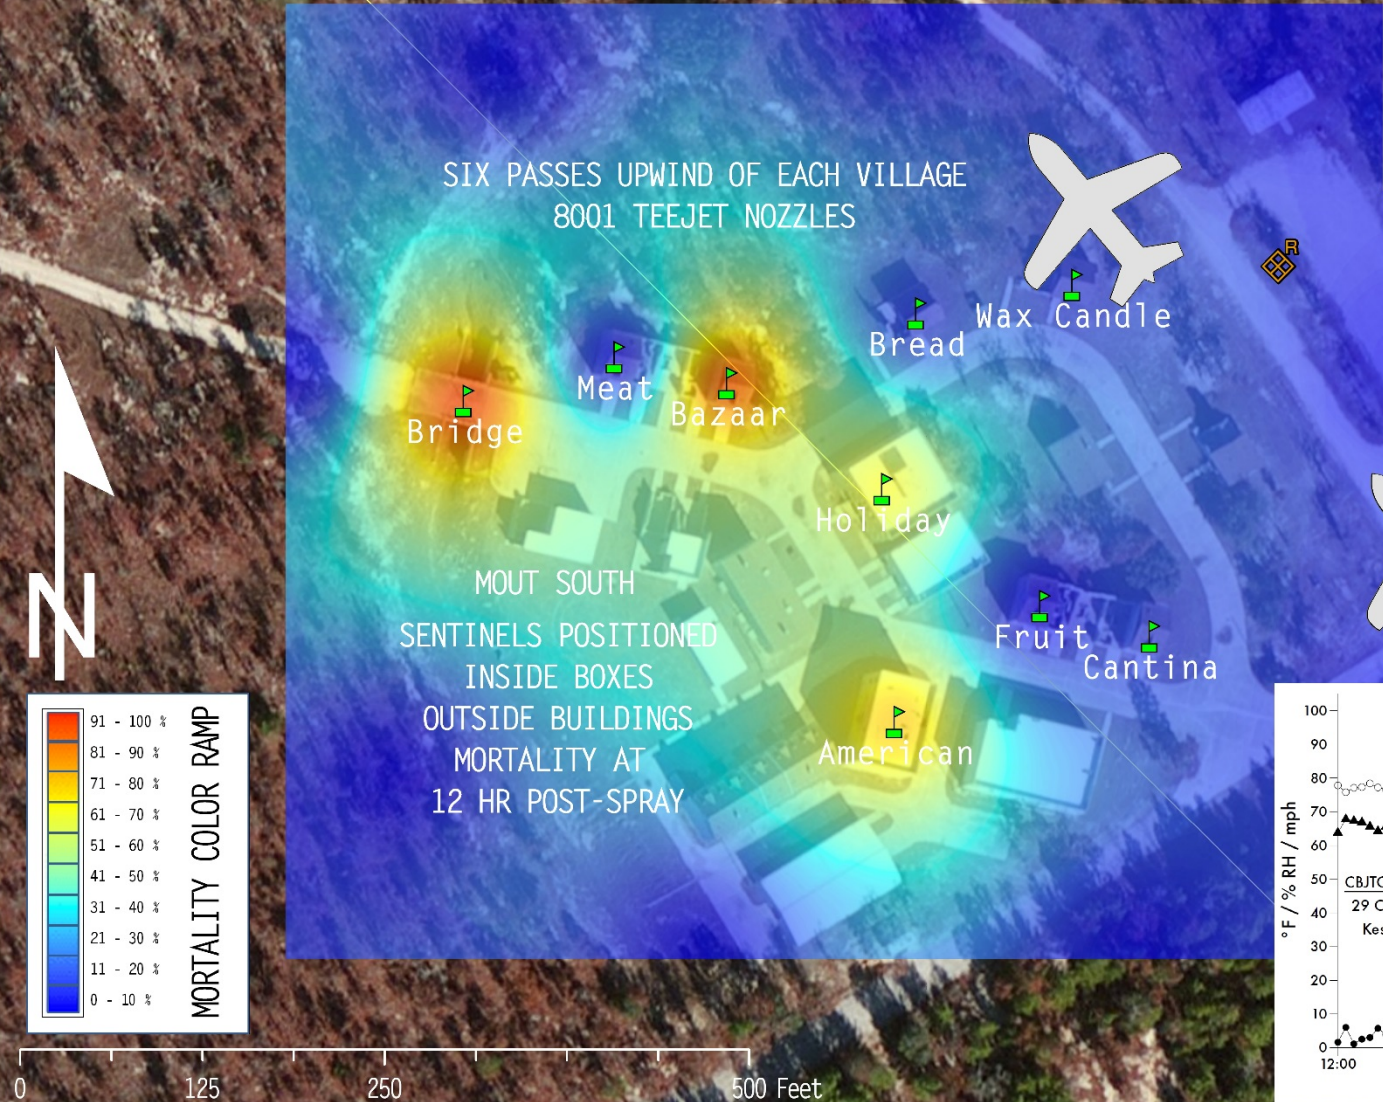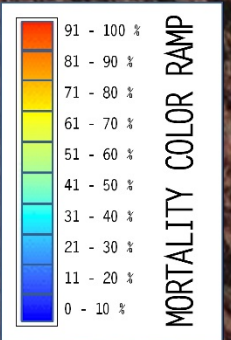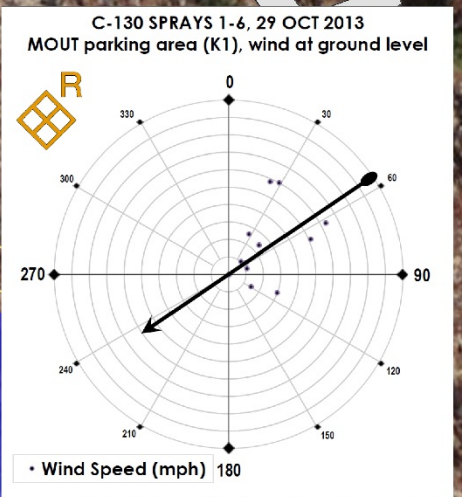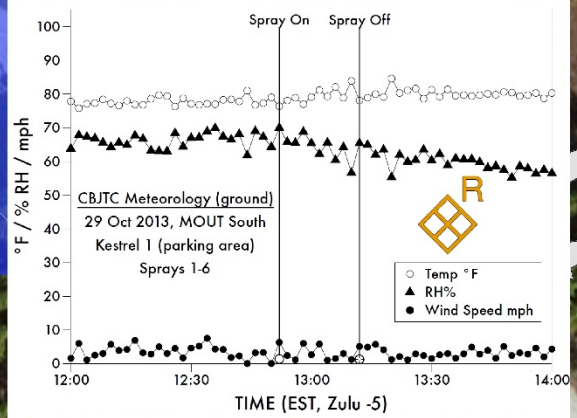

**Figure S4**  
 29 October 2013  
 800I nozzles  
 MOUT South  
 1 hr mortality  
 Outdoors **ON POLE**

USAF / USDA-ARS-CMAVE / NECE  
 DWFP COLLABORATIVE FIELD TRIAL  
 2013-10-29  
 CAMP BLANDING JOINT TRAINING CENTER, FL  
 MOUT VILLAGE  
 DIBROM AERIAL APPLICATION  
 AE. AEGYPTI TARGET

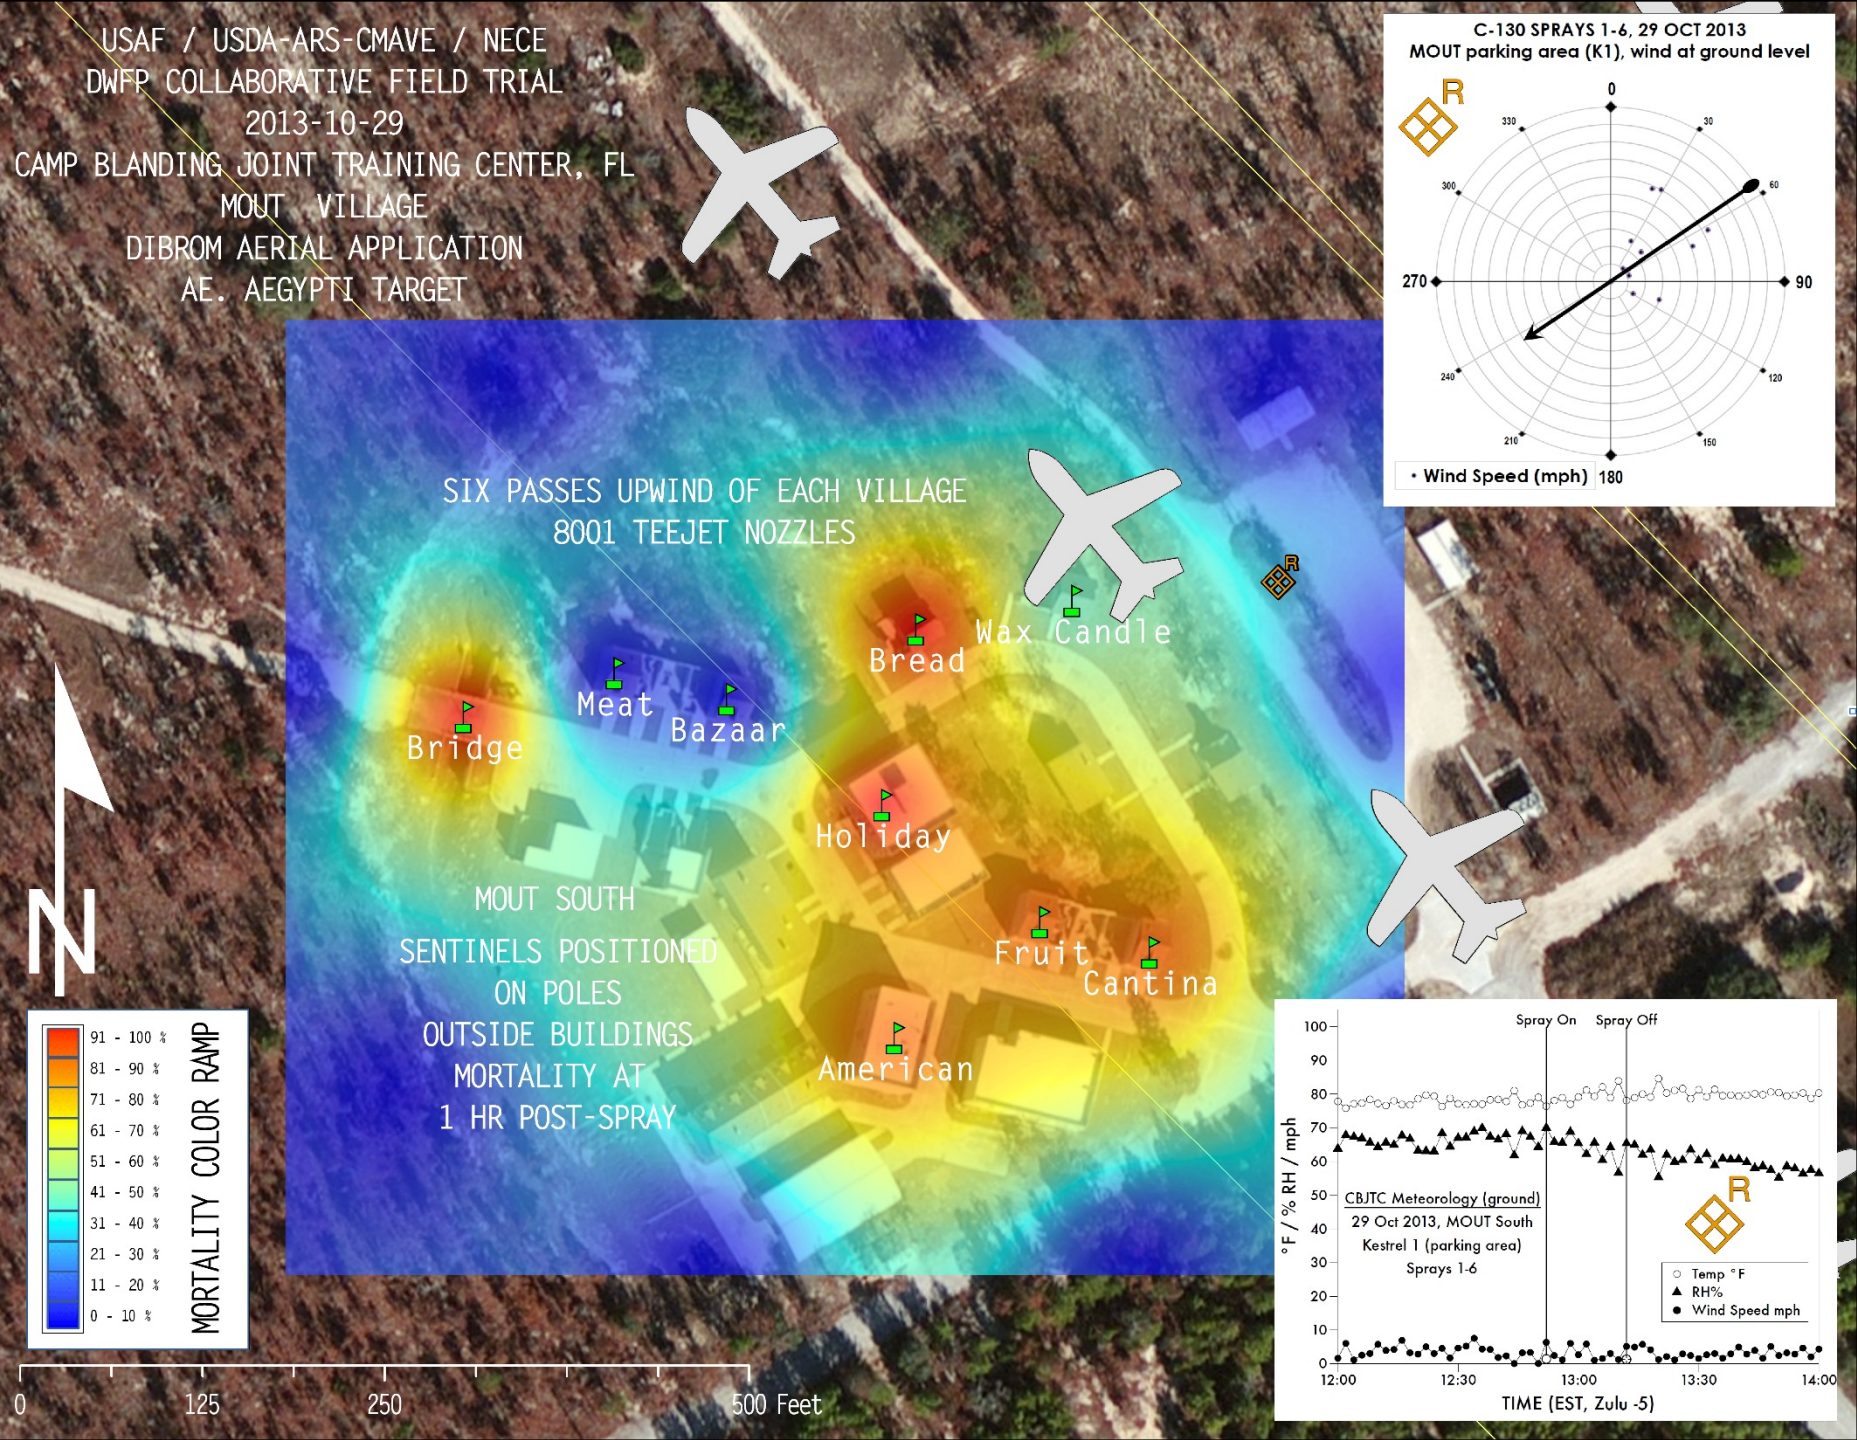

**Figure S5**  
 29 October 2013  
 800I nozzles  
 MOUT South  
 4 hr mortality  
 Outdoors **ON POLE**

USAF / USDA-ARS-CMAVE / NECE  
 DWFP COLLABORATIVE FIELD TRIAL  
 2013-10-29  
 CAMP BLANDING JOINT TRAINING CENTER, FL  
 MOUT VILLAGE  
 DIBROM AERIAL APPLICATION  
 AE. AEGYPTI TARGET

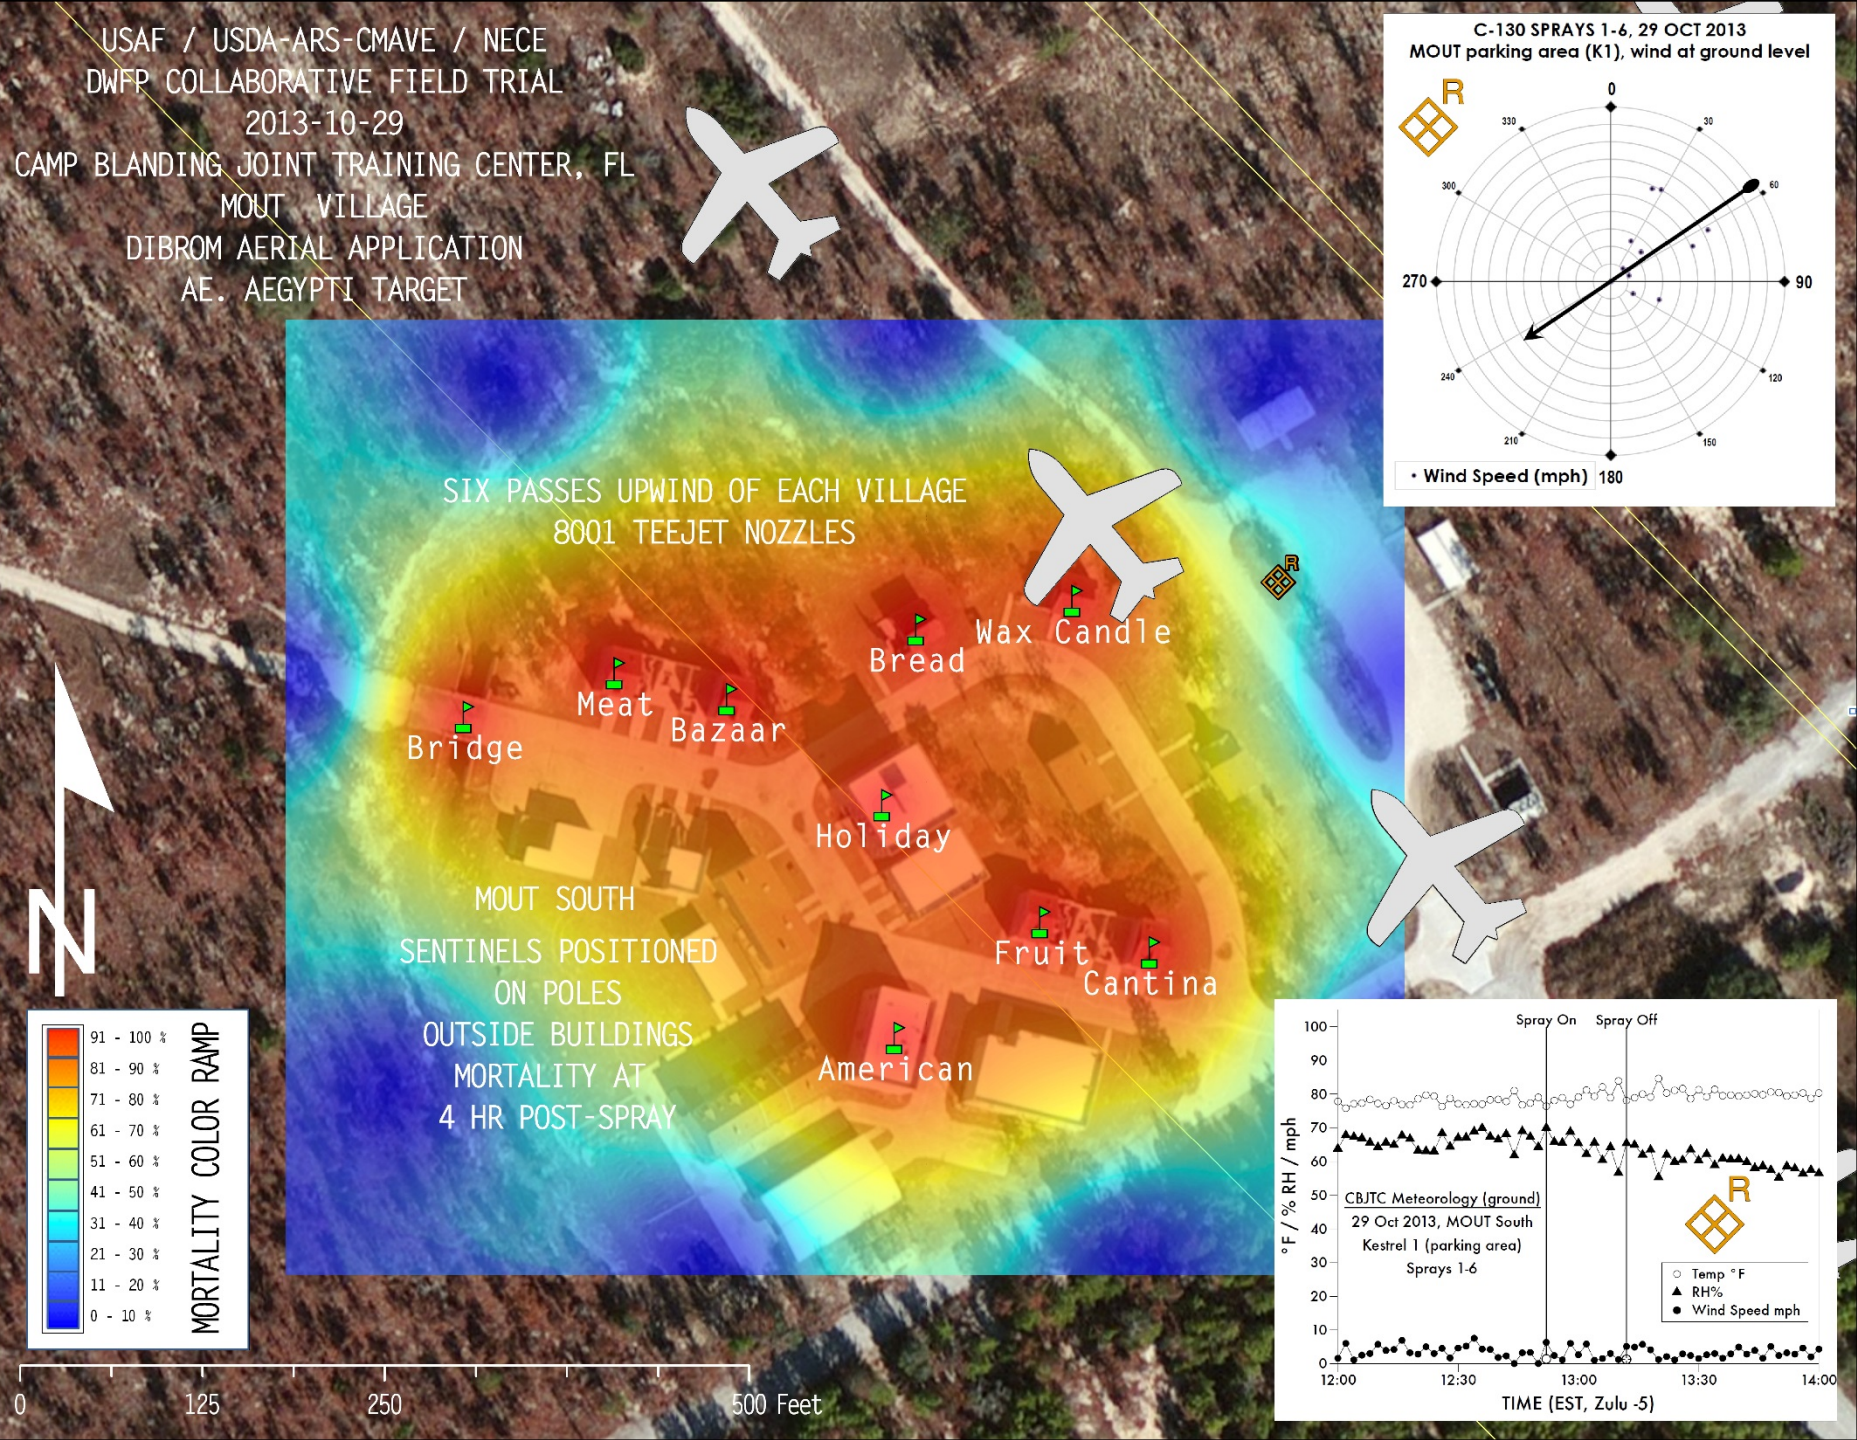

**Figure S6**  
 29 October 2013  
 8001 nozzles  
 MOUT South  
 12 hr mortality  
 Outdoors **ON POLE**

USAF / USDA-ARS-CMAVE / NECE  
 DWFP COLLABORATIVE FIELD TRIAL  
 2013-10-29  
 CAMP BLANDING JOINT TRAINING CENTER, FL  
 MOUT VILLAGE  
 DIBROM AERIAL APPLICATION  
 AE. AEGYPTI TARGET

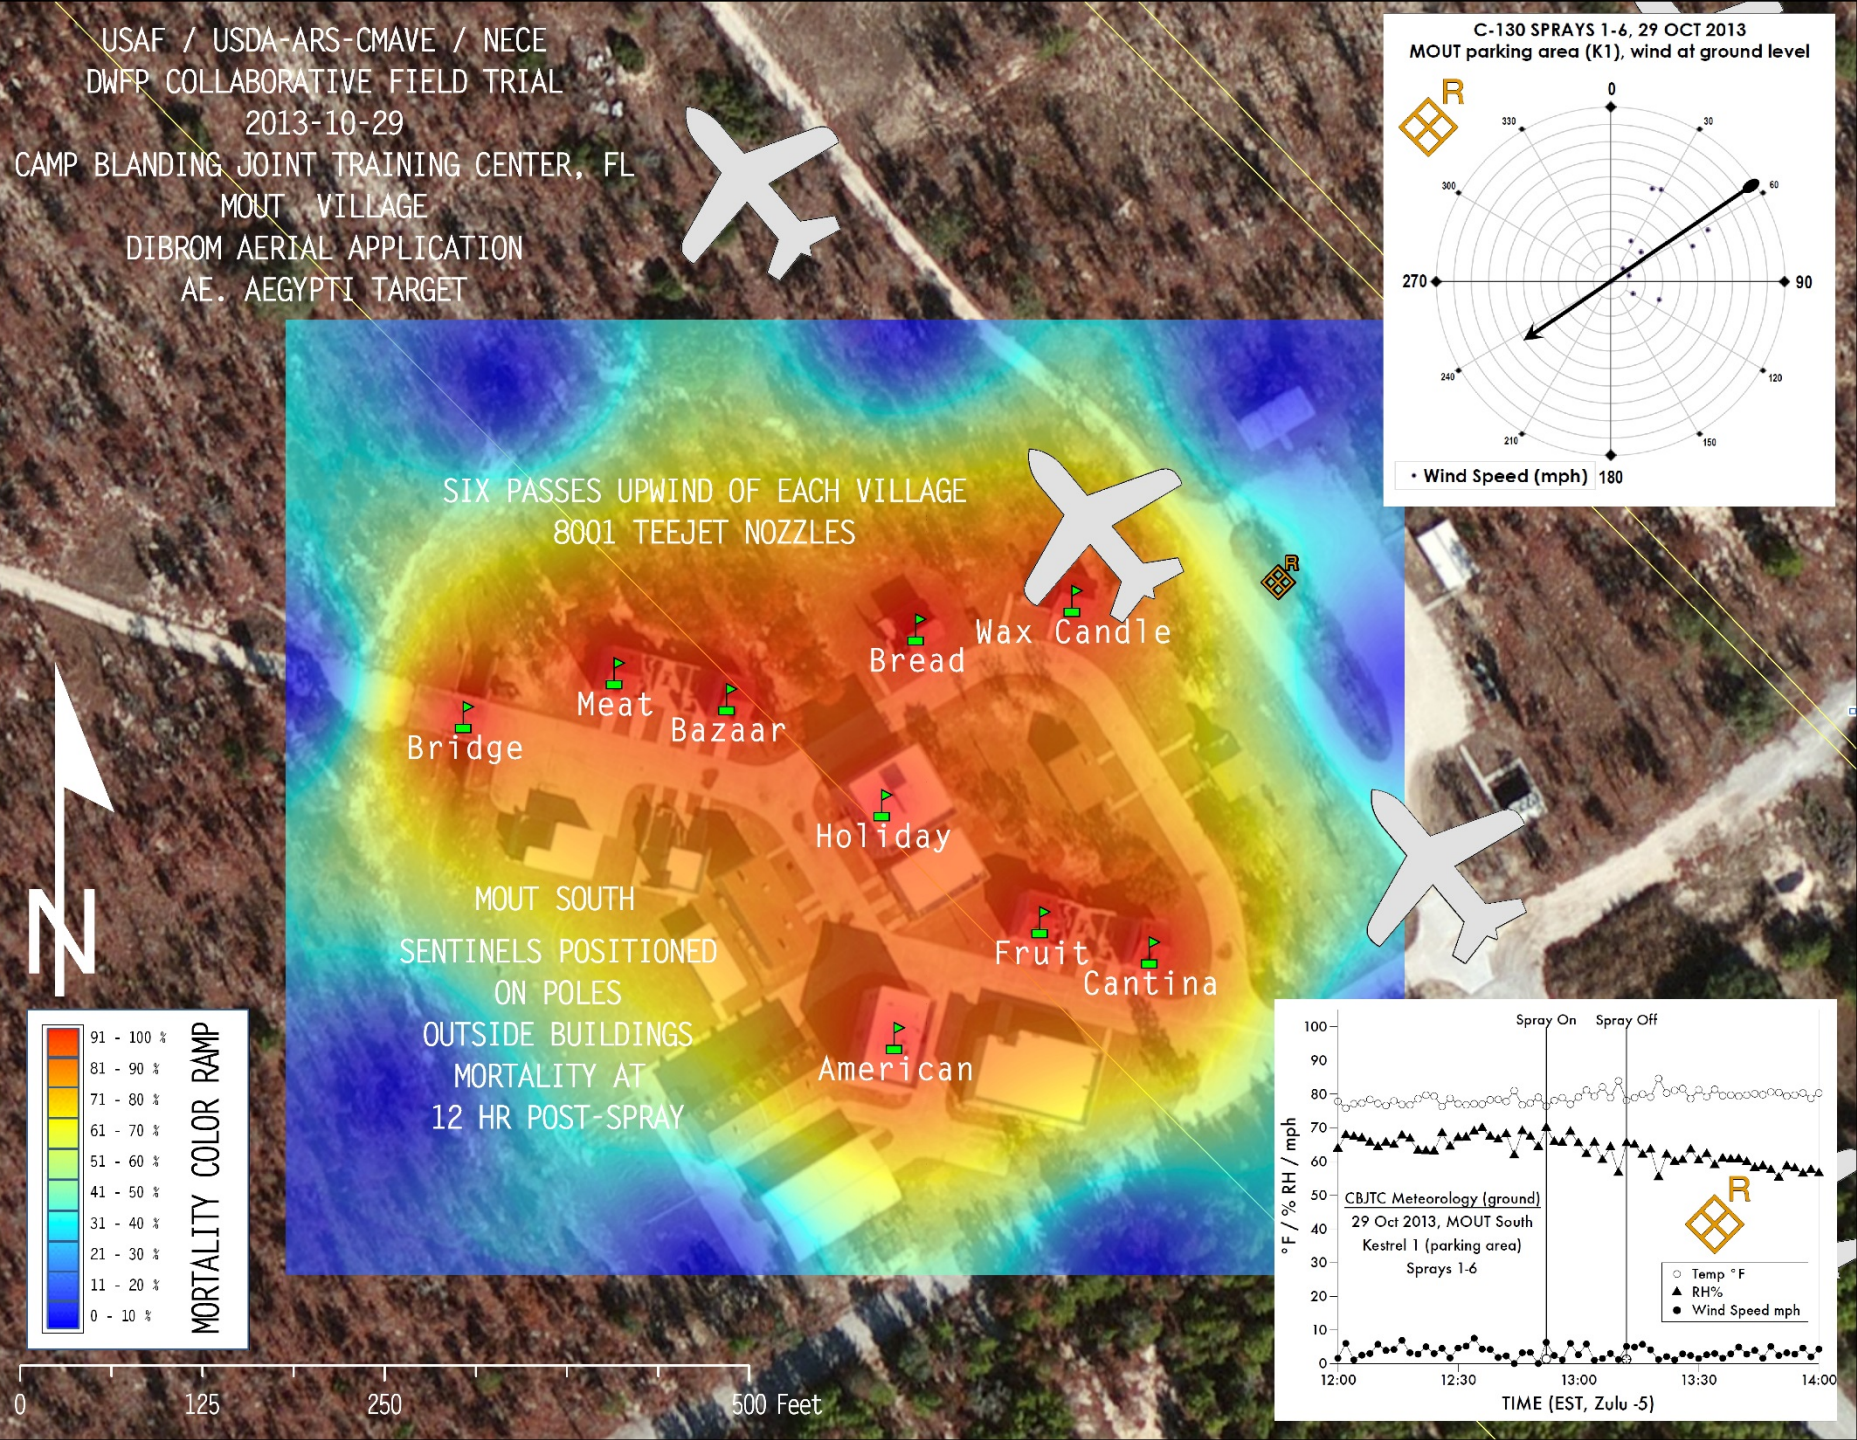

**Figure S7**  
 29 October 2013  
 800I nozzles  
 MOUT South  
 1 hr mortality  
 Indoors **IN BOX**

USAF / USDA-ARS-CMAVE / NECE  
 DWFP COLLABORATIVE FIELD TRIAL  
 2013-10-29  
 CAMP BLANDING JOINT TRAINING CENTER, FL  
 MOUT VILLAGE  
 DIBROM AERIAL APPLICATION  
 AE. AEGYPTI TARGET

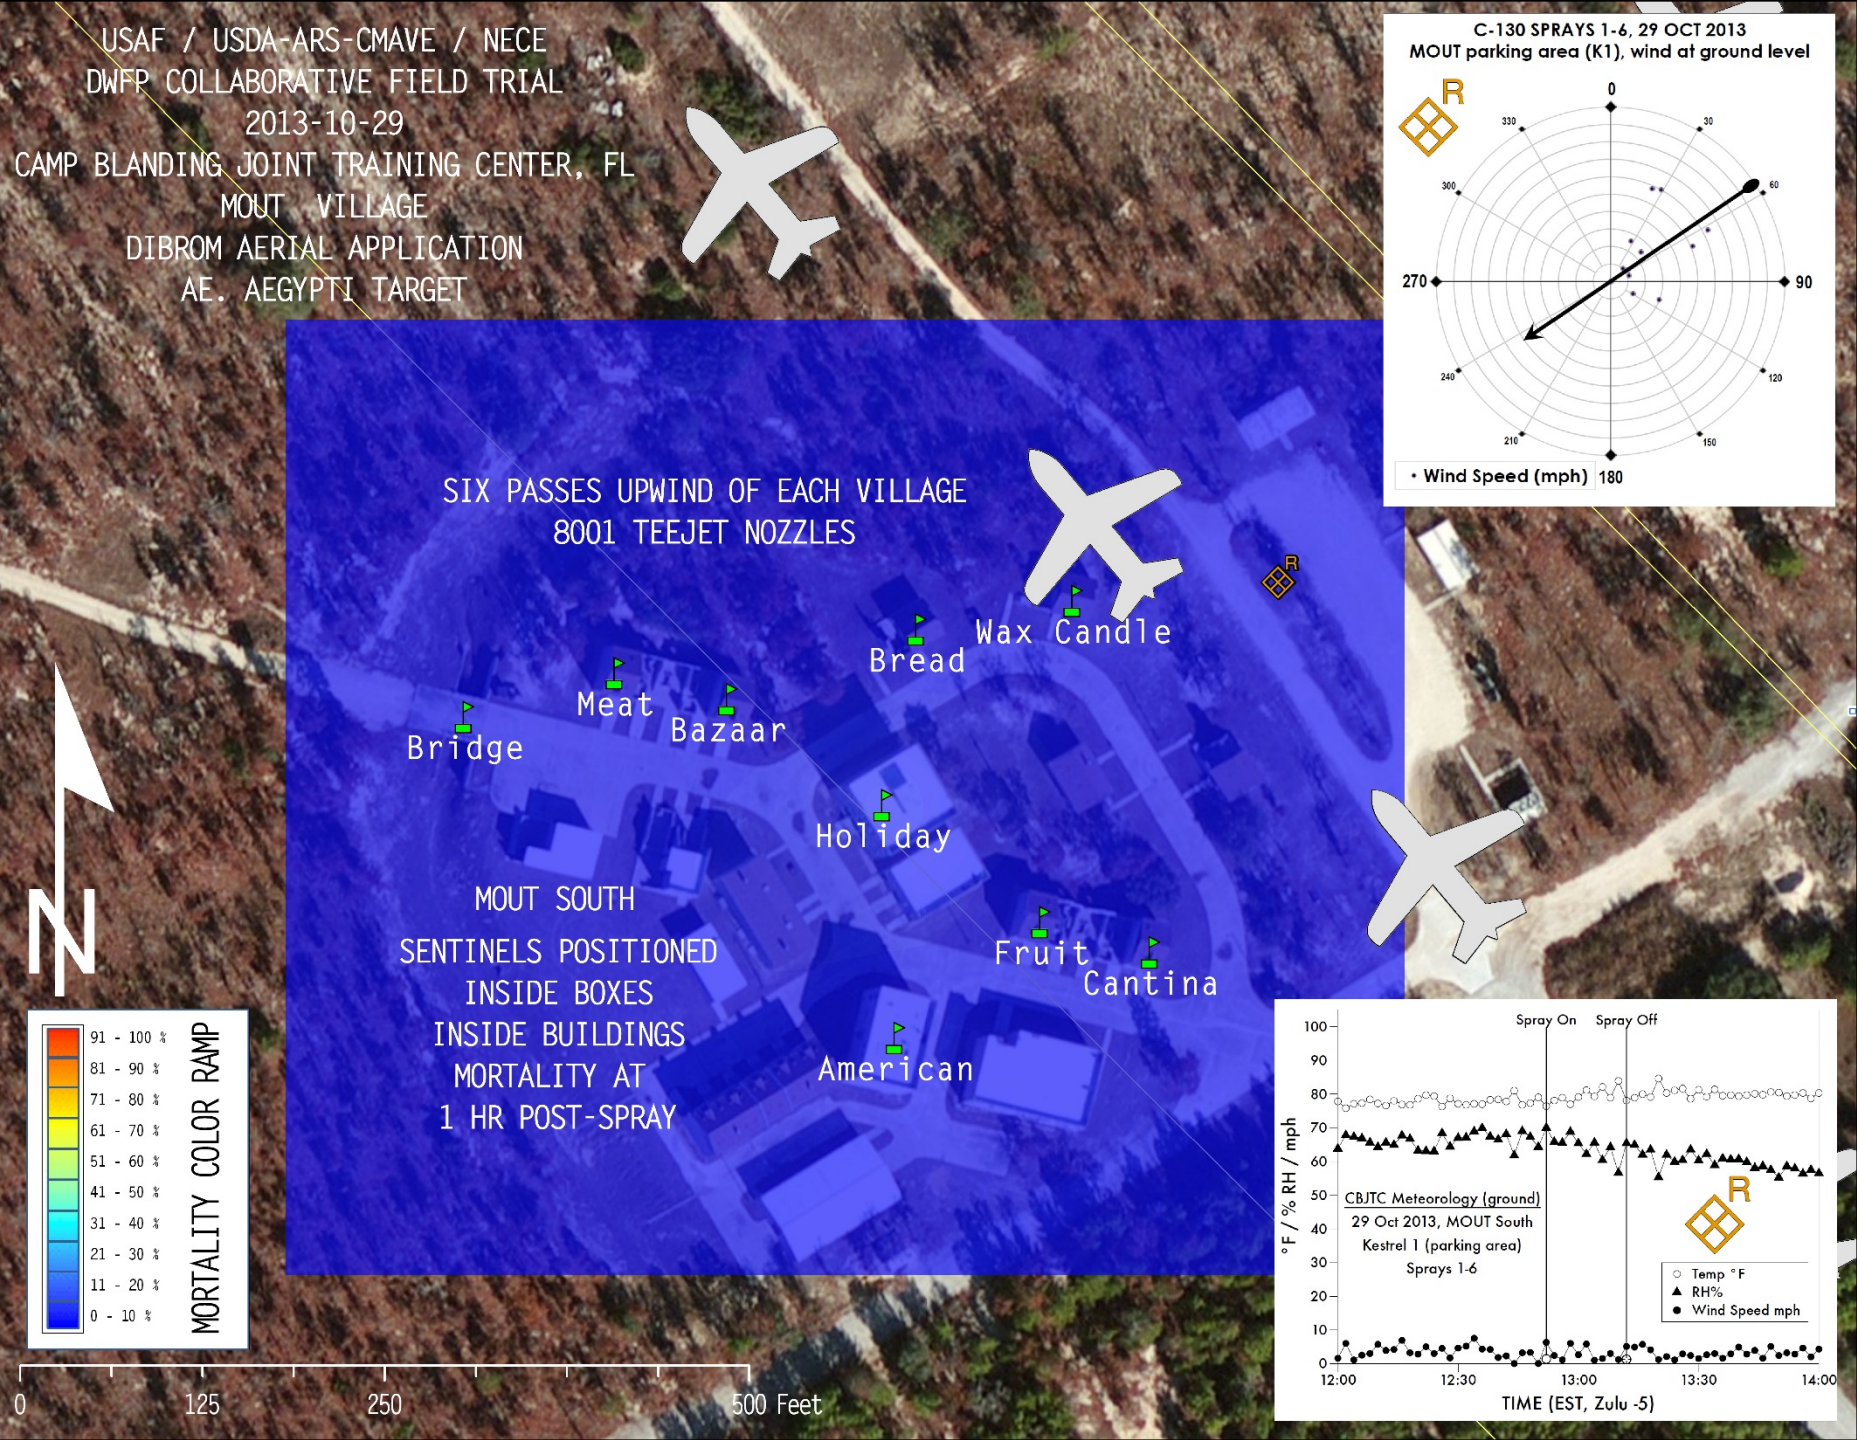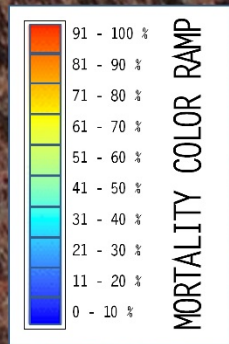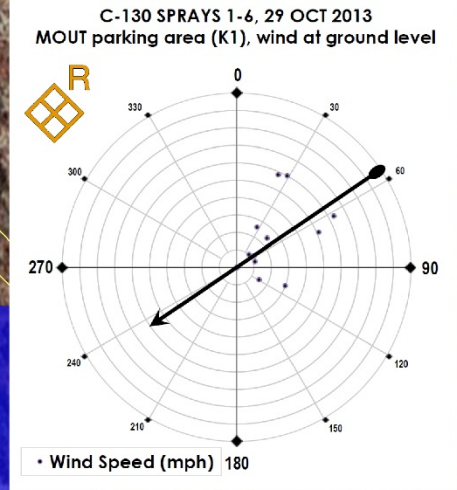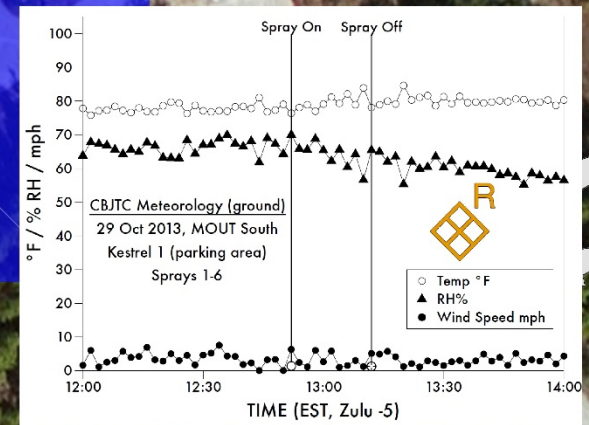



**Figure S8**  
 29 October 2013  
 800I nozzles  
 MOUT South  
 4 hr mortality  
 Indoors **IN BOX**

USAF / USDA-ARS-CMAVE / NECE  
 DWFP COLLABORATIVE FIELD TRIAL  
 2013-10-29  
 CAMP BLANDING JOINT TRAINING CENTER, FL  
 MOUT VILLAGE  
 DIBROM AERIAL APPLICATION  
 AE. AEGYPTI TARGET

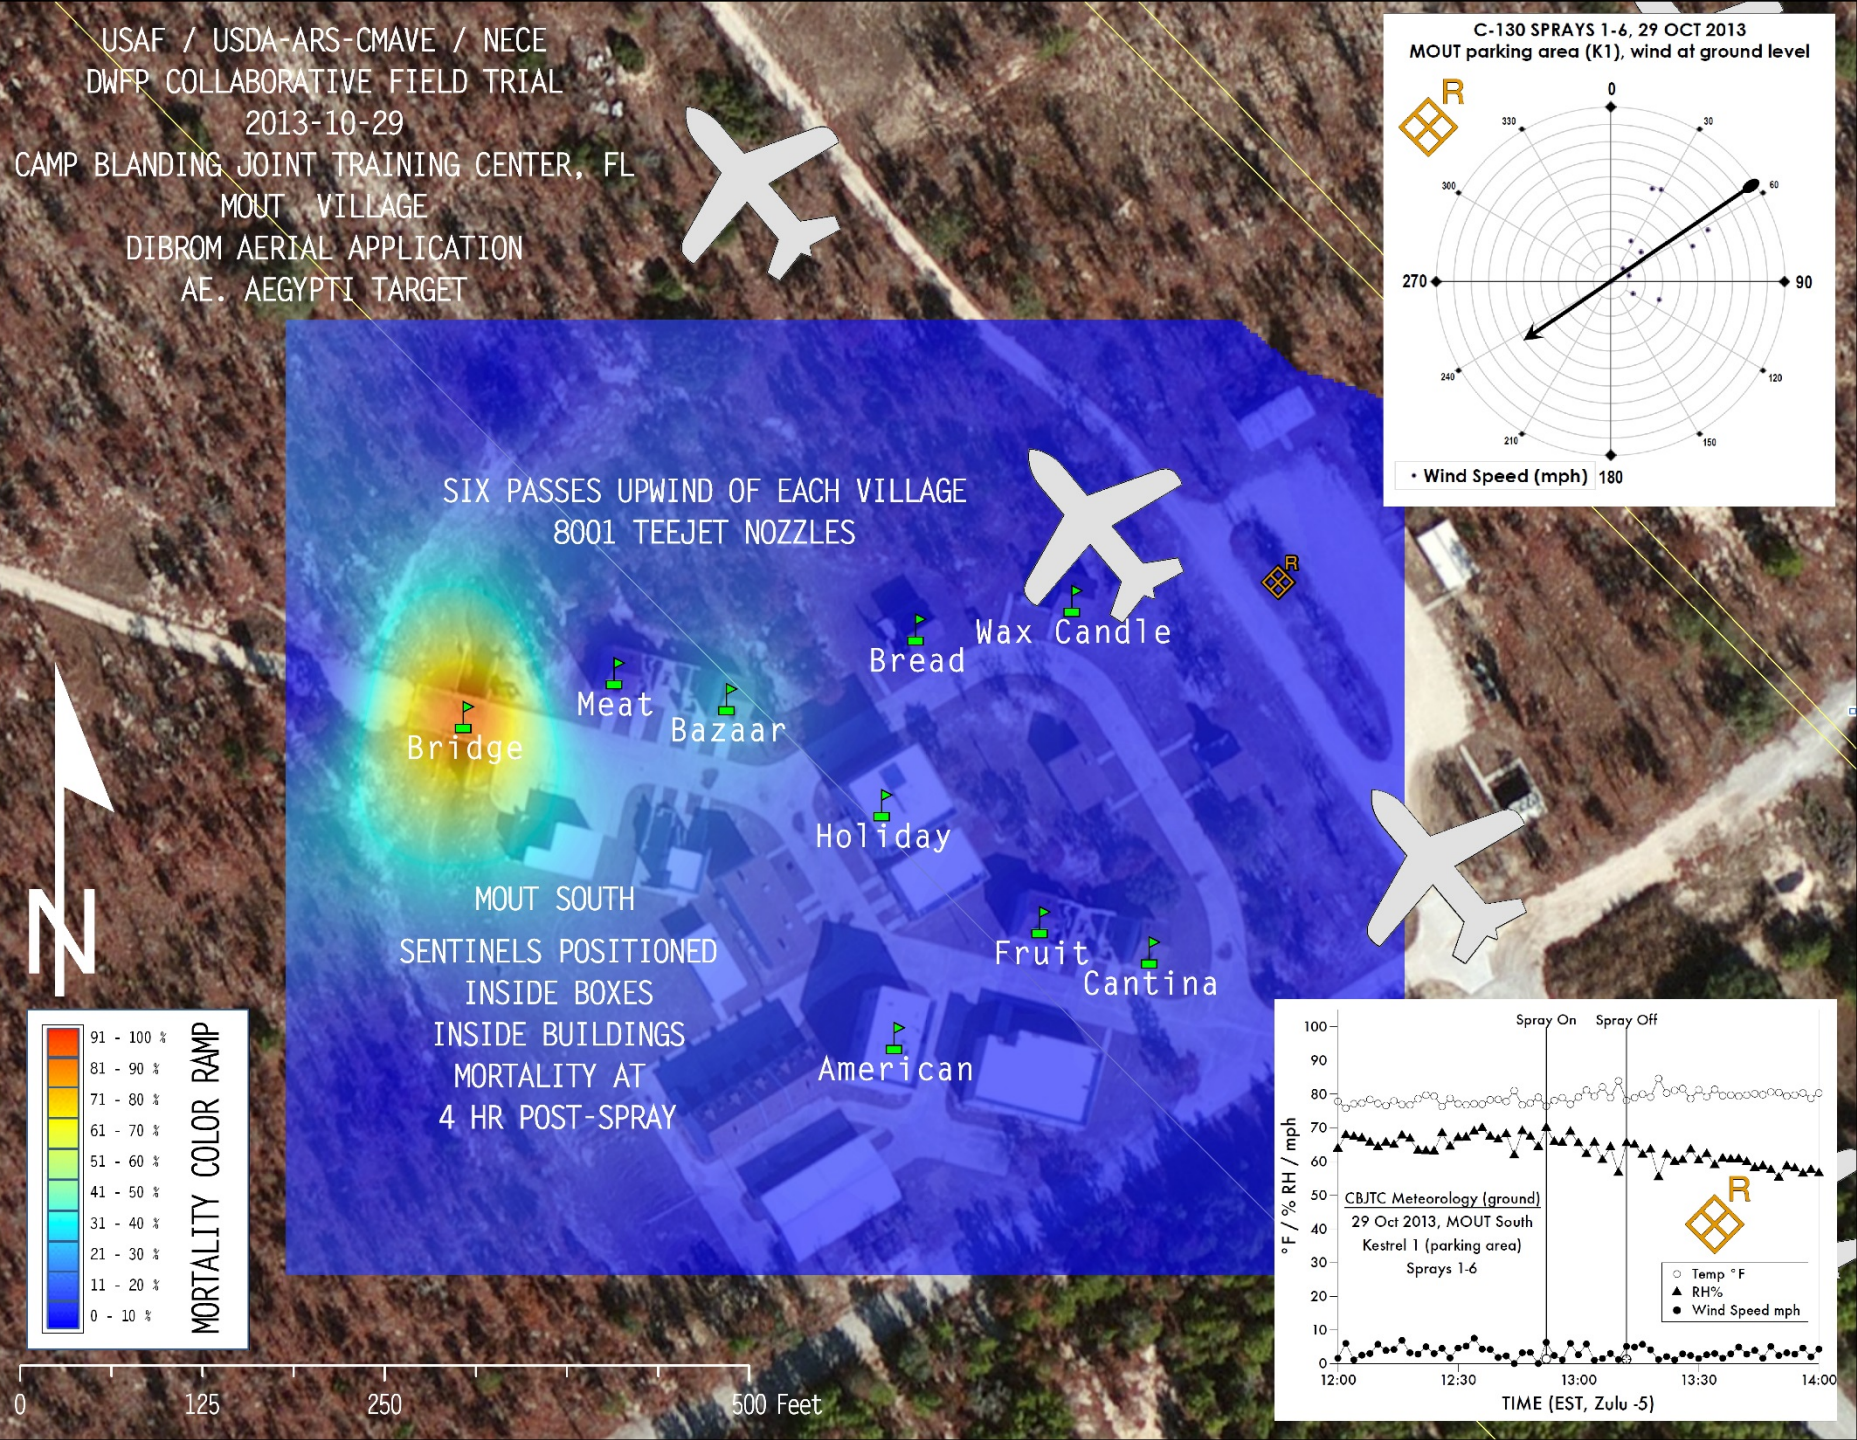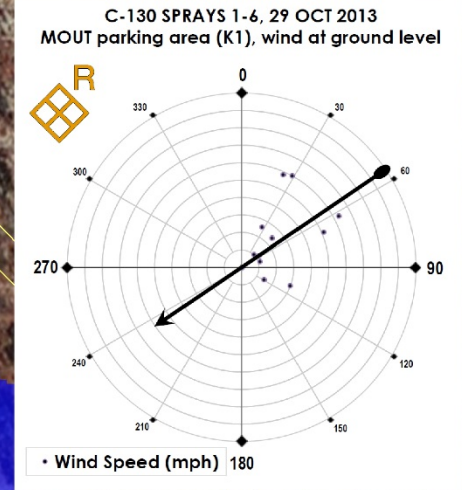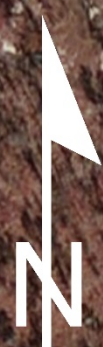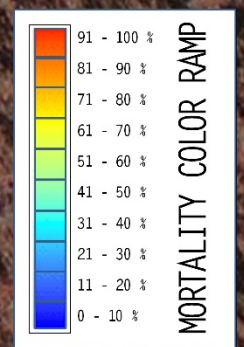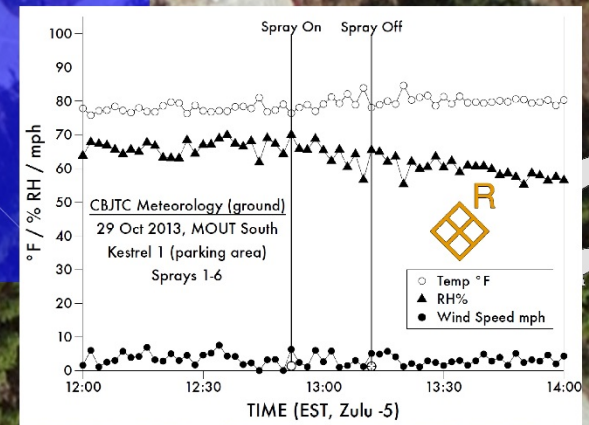

**Figure S9**  
 29 October 2013  
 800I nozzles  
 MOUT South  
 12 hr mortality  
 Indoors **IN BOX**

USAF / USDA-ARS-CMAVE / NECE  
 DWFP COLLABORATIVE FIELD TRIAL  
 2013-10-29  
 CAMP BLANDING JOINT TRAINING CENTER, FL  
 MOUT VILLAGE  
 DIBROM AERIAL APPLICATION  
 AE. AEGYPTI TARGET

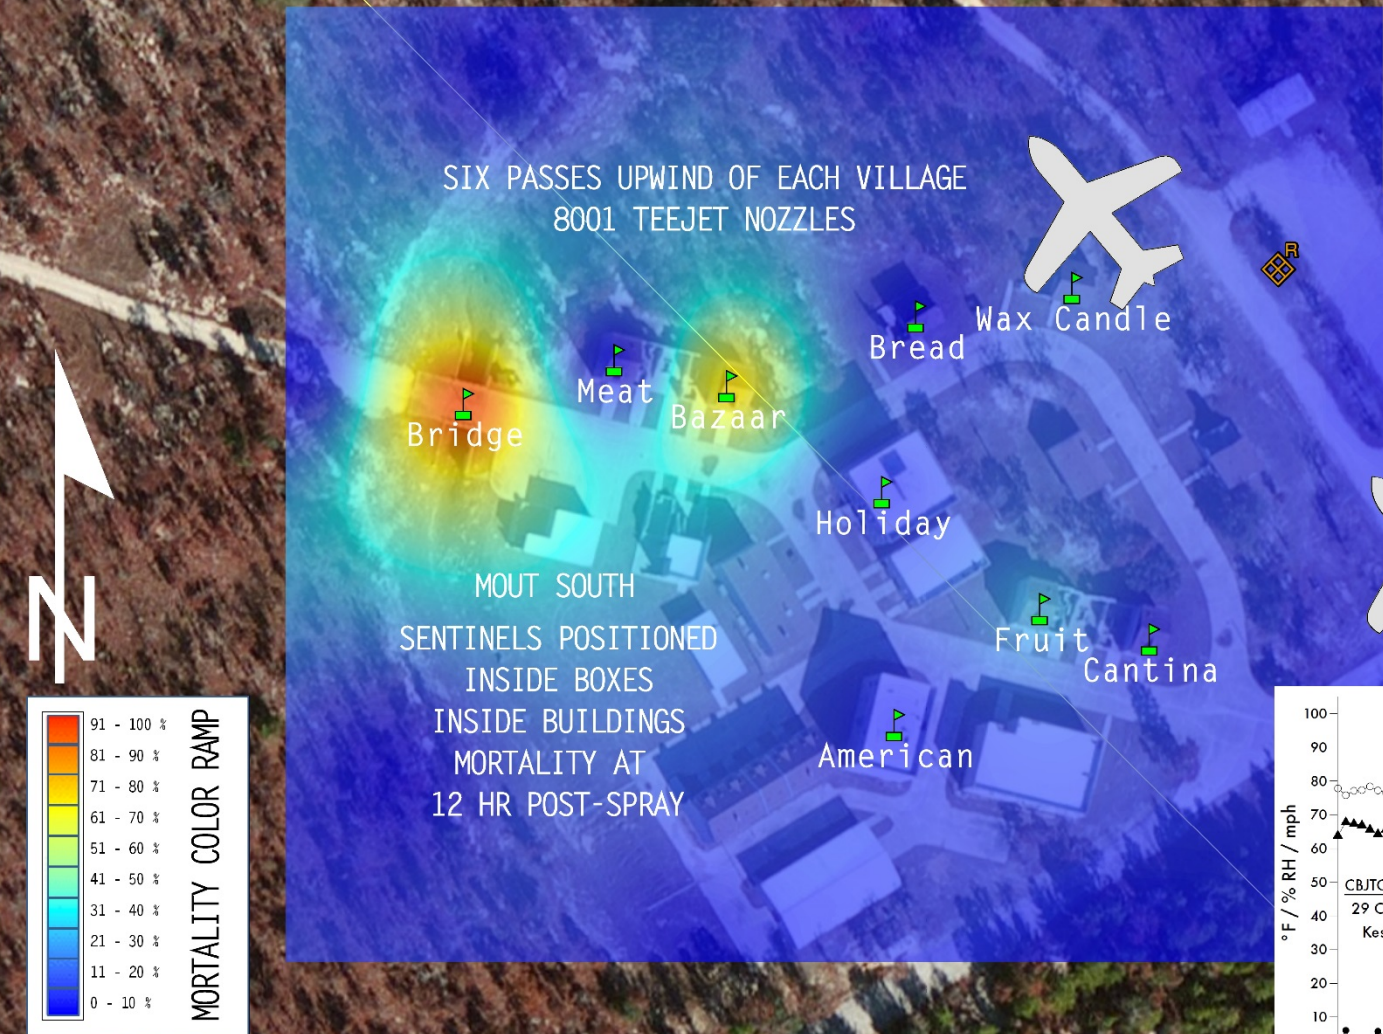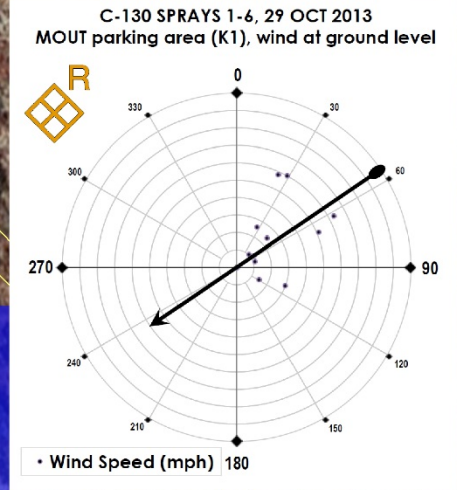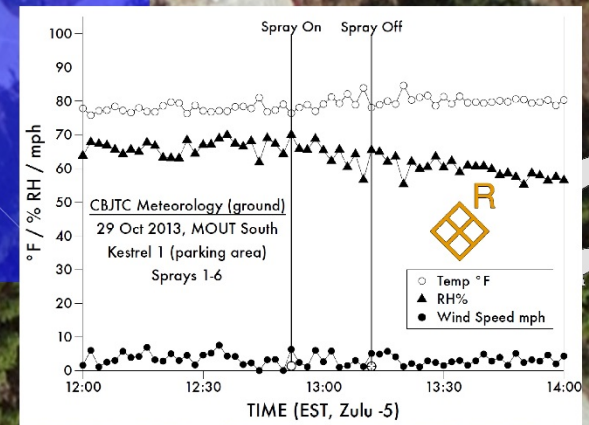

**Figure S10**  
 29 October 2013  
 800I nozzles  
 MOUT South  
 1 hr mortality  
 Indoors **ON FLOOR**

USAF / USDA-ARS-CMAVE / NECE  
 DWFP COLLABORATIVE FIELD TRIAL  
 2013-10-29  
 CAMP BLANDING JOINT TRAINING CENTER, FL  
 MOUT VILLAGE  
 DIBROM AERIAL APPLICATION  
 AE. AEGYPTI TARGET

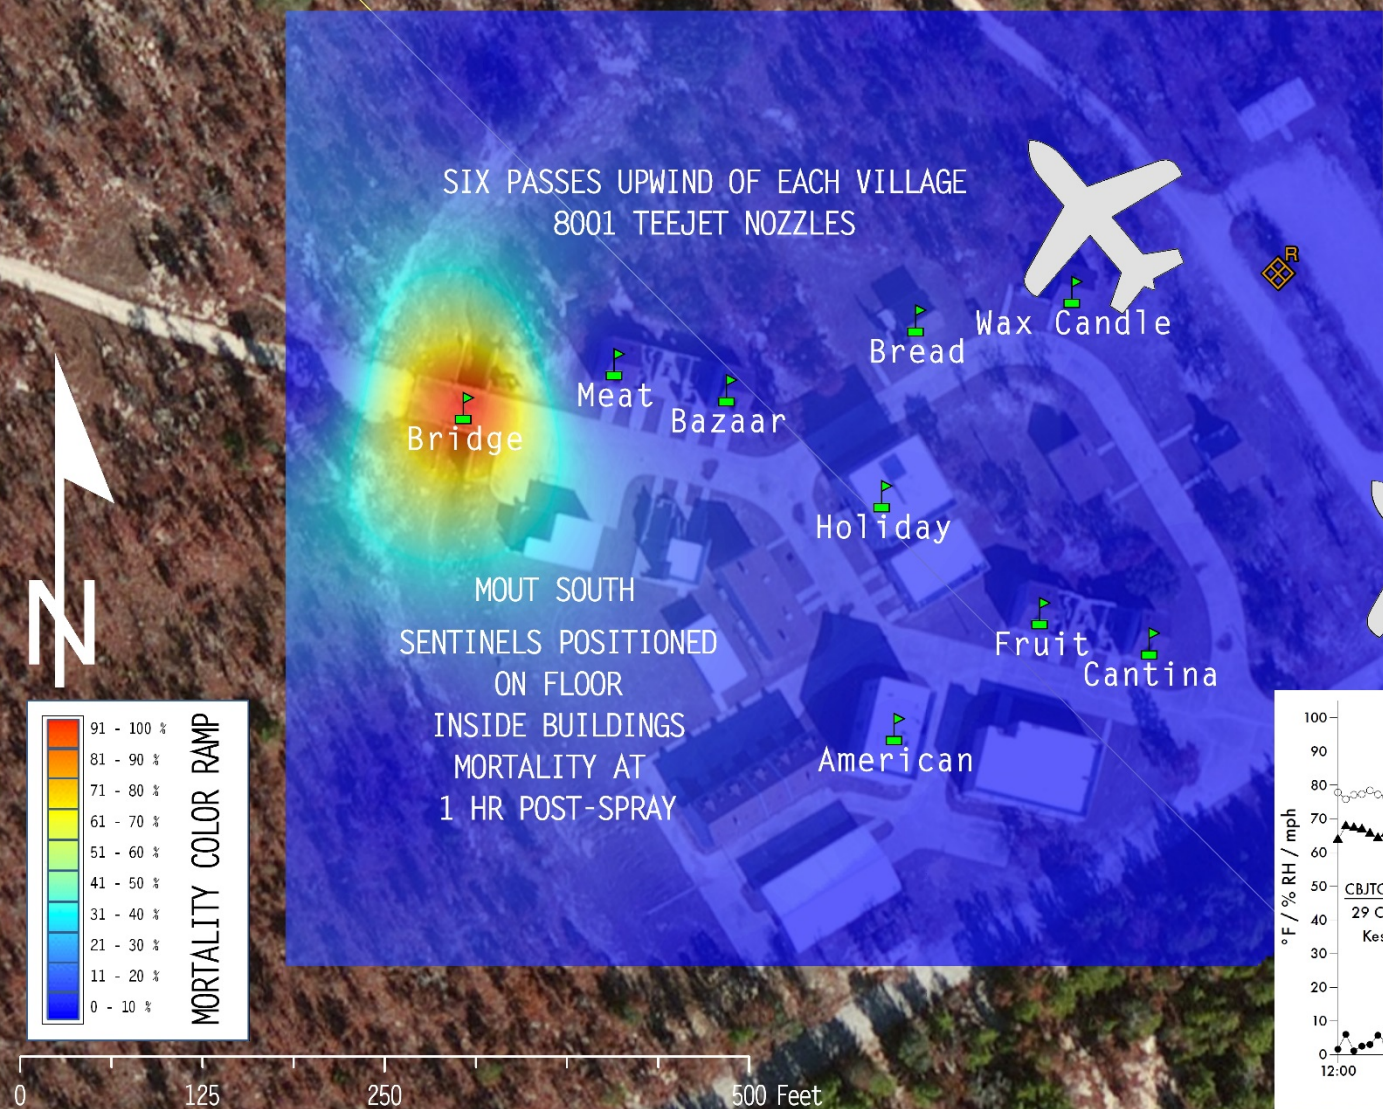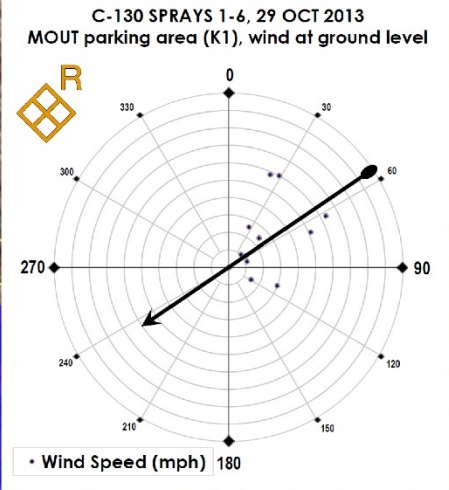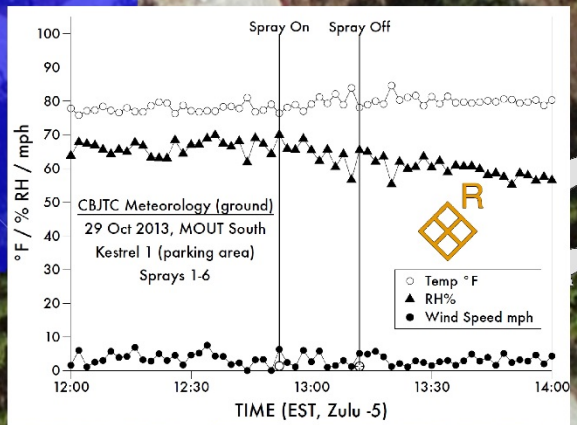

**Figure S11**  
 29 October 2013  
 8001 nozzles  
 MOUT South  
 4 hr mortality  
 Indoors **ON FLOOR**

USAF / USDA-ARS-CMAVE / NECE  
 DWFP COLLABORATIVE FIELD TRIAL  
 2013-10-29  
 CAMP BLANDING JOINT TRAINING CENTER, FL  
 MOUT VILLAGE  
 DIBROM AERIAL APPLICATION  
 AE. AEGYPTI TARGET

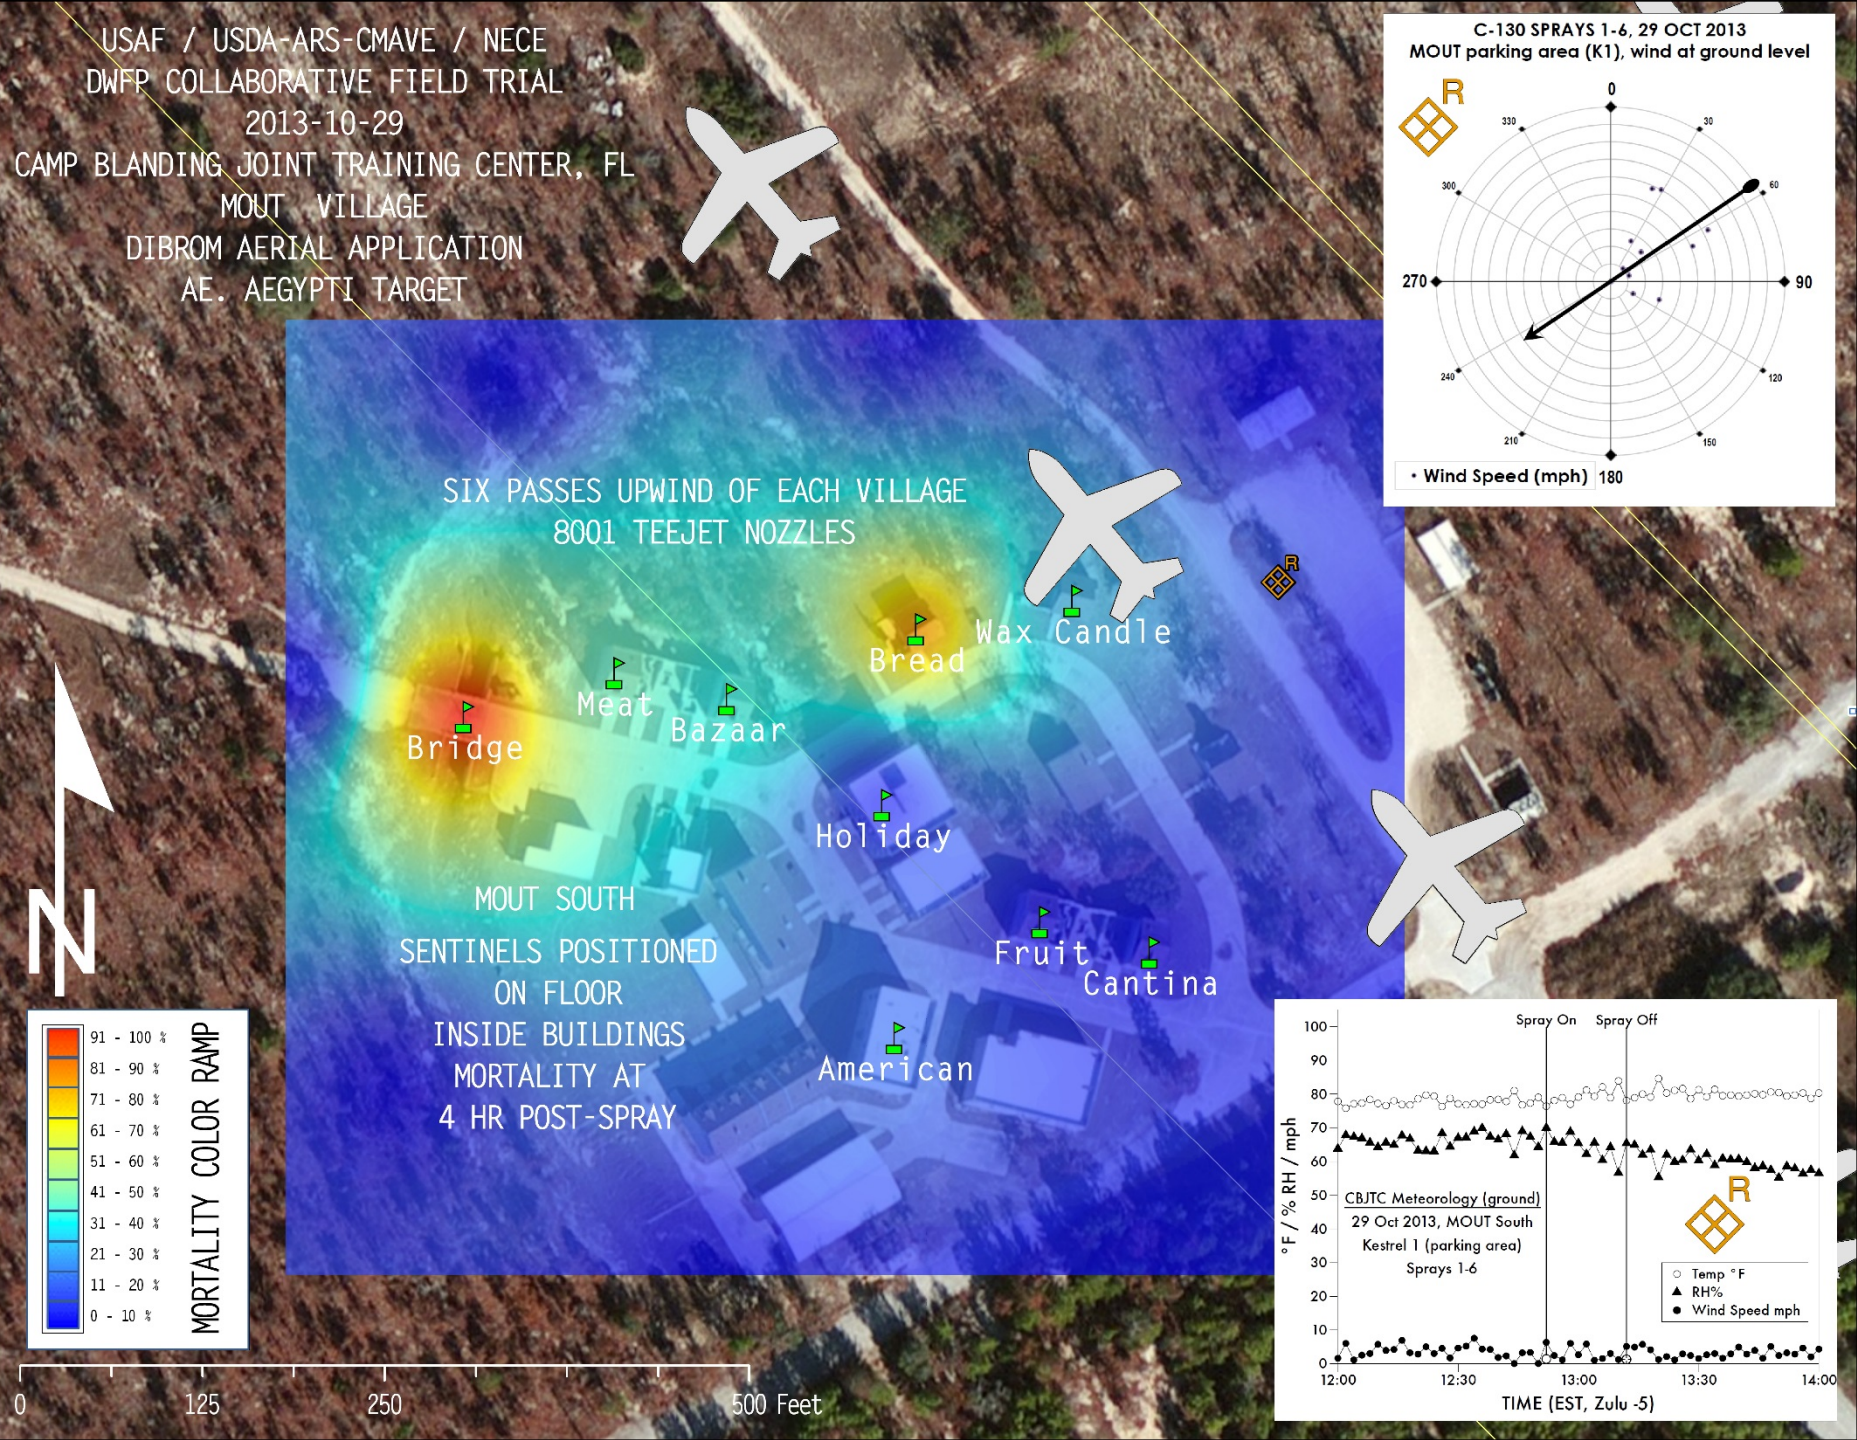

**Figure S12**  
 29 October 2013  
 8001 nozzles  
 MOUT South  
 12 hr mortality  
 Indoors **ON FLOOR**

USAF / USDA-ARS-CMAVE / NECE  
 DWFP COLLABORATIVE FIELD TRIAL  
 2013-10-29  
 CAMP BLANDING JOINT TRAINING CENTER, FL  
 MOUT VILLAGE  
 DIBROM AERIAL APPLICATION  
 AE. AEGYPTI TARGET

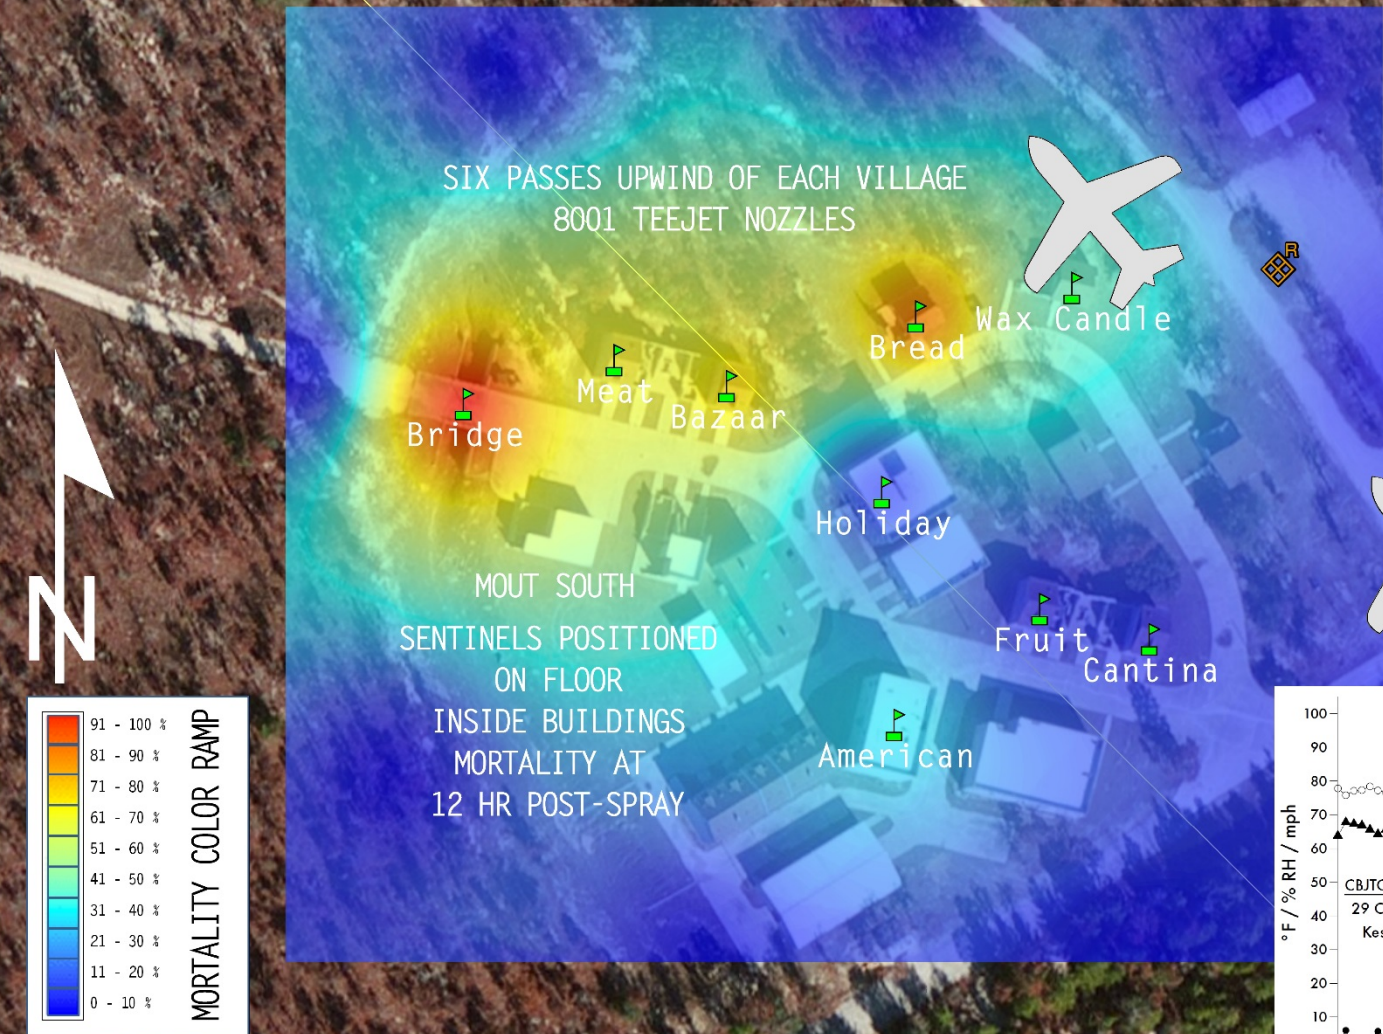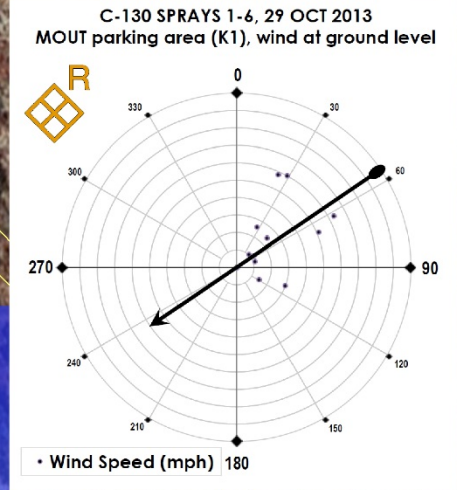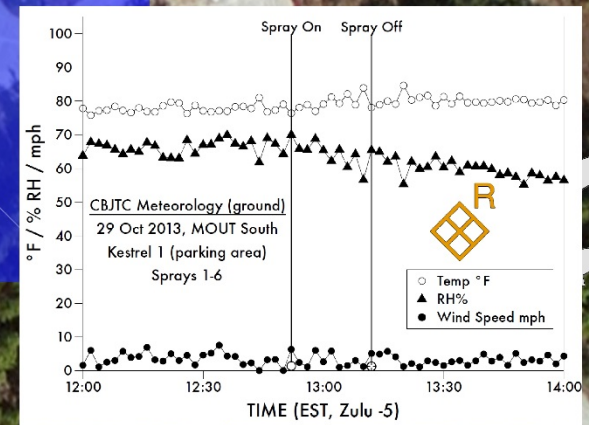

**SET B**

SI3–S24 Figs. Naled efficacy (mortality), MOUT 30 Oct.

**Figure S13**  
 30 October 2013  
 8003 nozzles  
 MOUT South  
 1 hr mortality  
 Outdoors **IN BOX**

USAF / USDA-ARS-CMAVE / NECE  
 DWFP COLLABORATIVE FIELD TRIAL  
 2013-10-30  
 CAMP BLANDING JOINT TRAINING CENTER, FL  
 MOUT VILLAGE  
 DIBROM AERIAL APPLICATION  
 AE. AEGYPTI TARGET

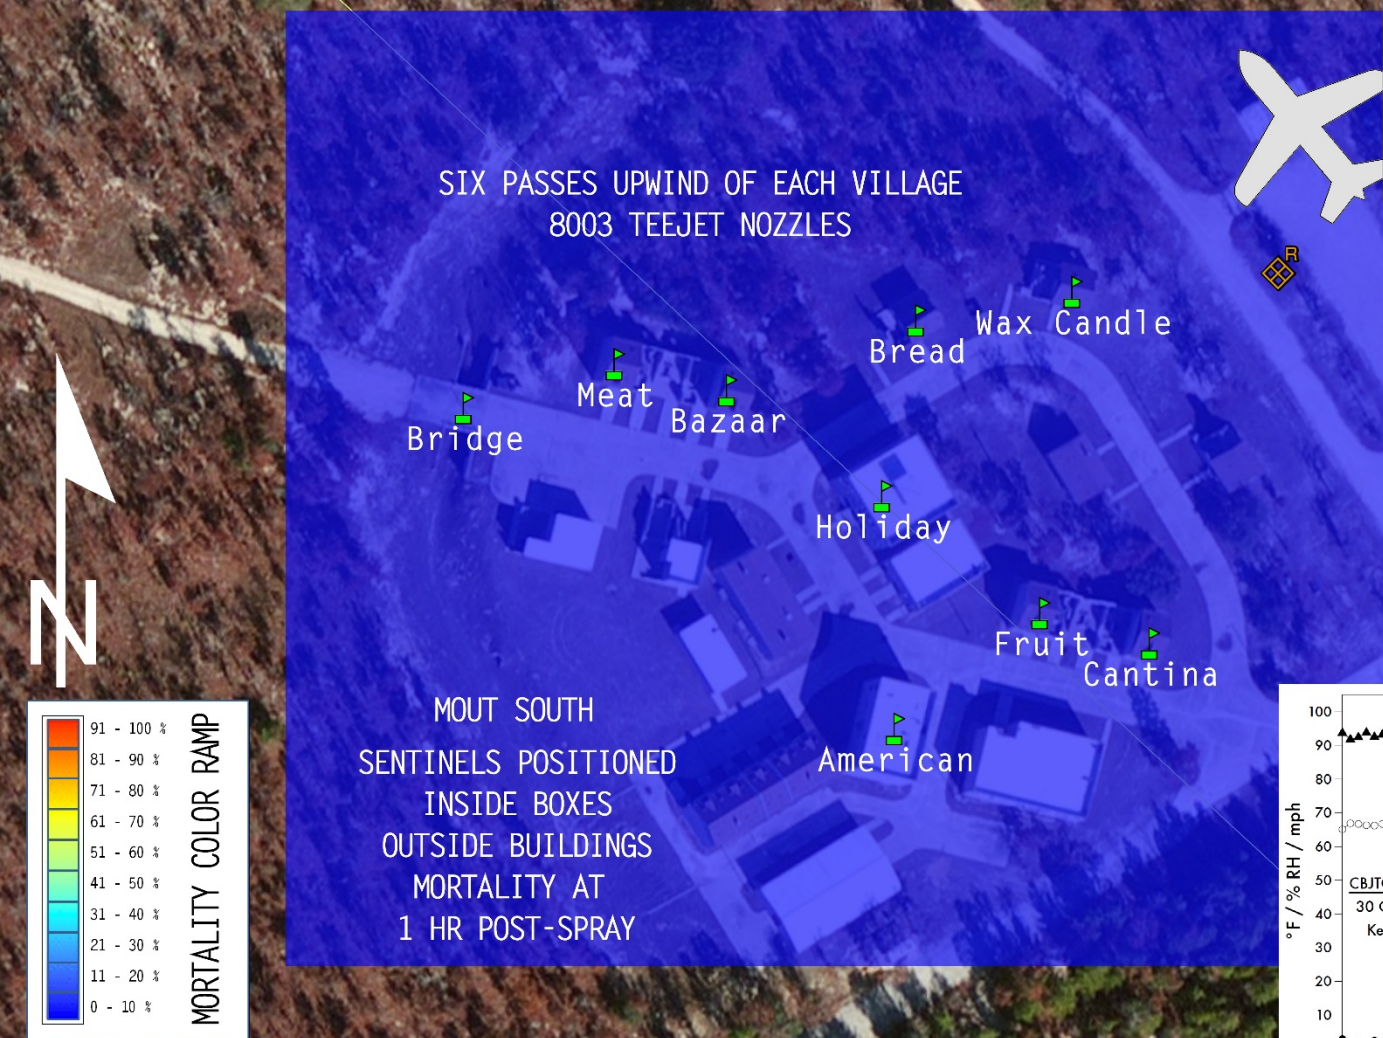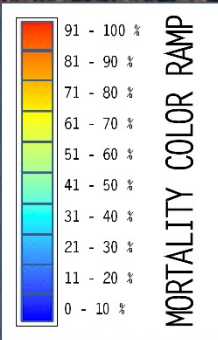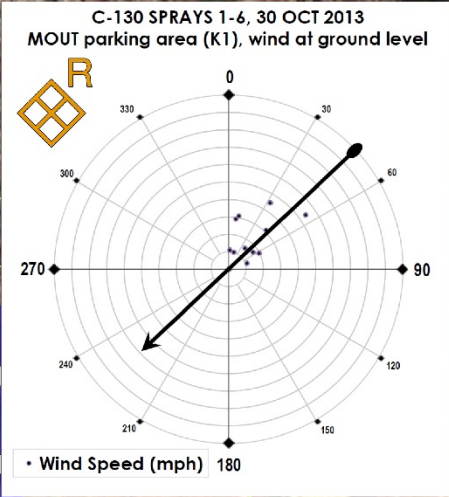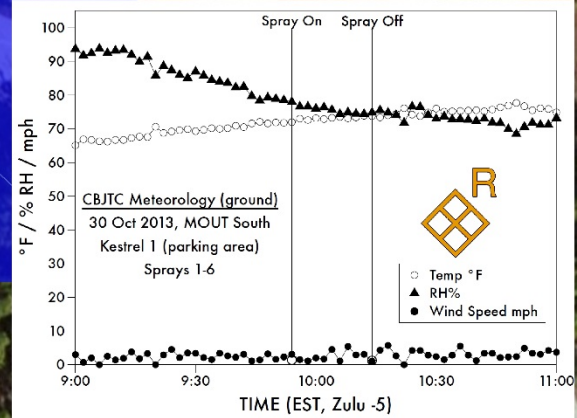

USAF / USDA-ARS-CMAVE / NECE  
 DWFP COLLABORATIVE FIELD TRIAL  
 2013-10-30  
 CAMP BLANDING JOINT TRAINING CENTER, FL  
 MOUT VILLAGE  
 DIBROM AERIAL APPLICATION  
 AE. AEGYPTI TARGET

**Figure S14**  
 30 October 2013  
 8003 nozzles  
 MOUT South  
 4 hr mortality  
 Outdoors **IN BOX**

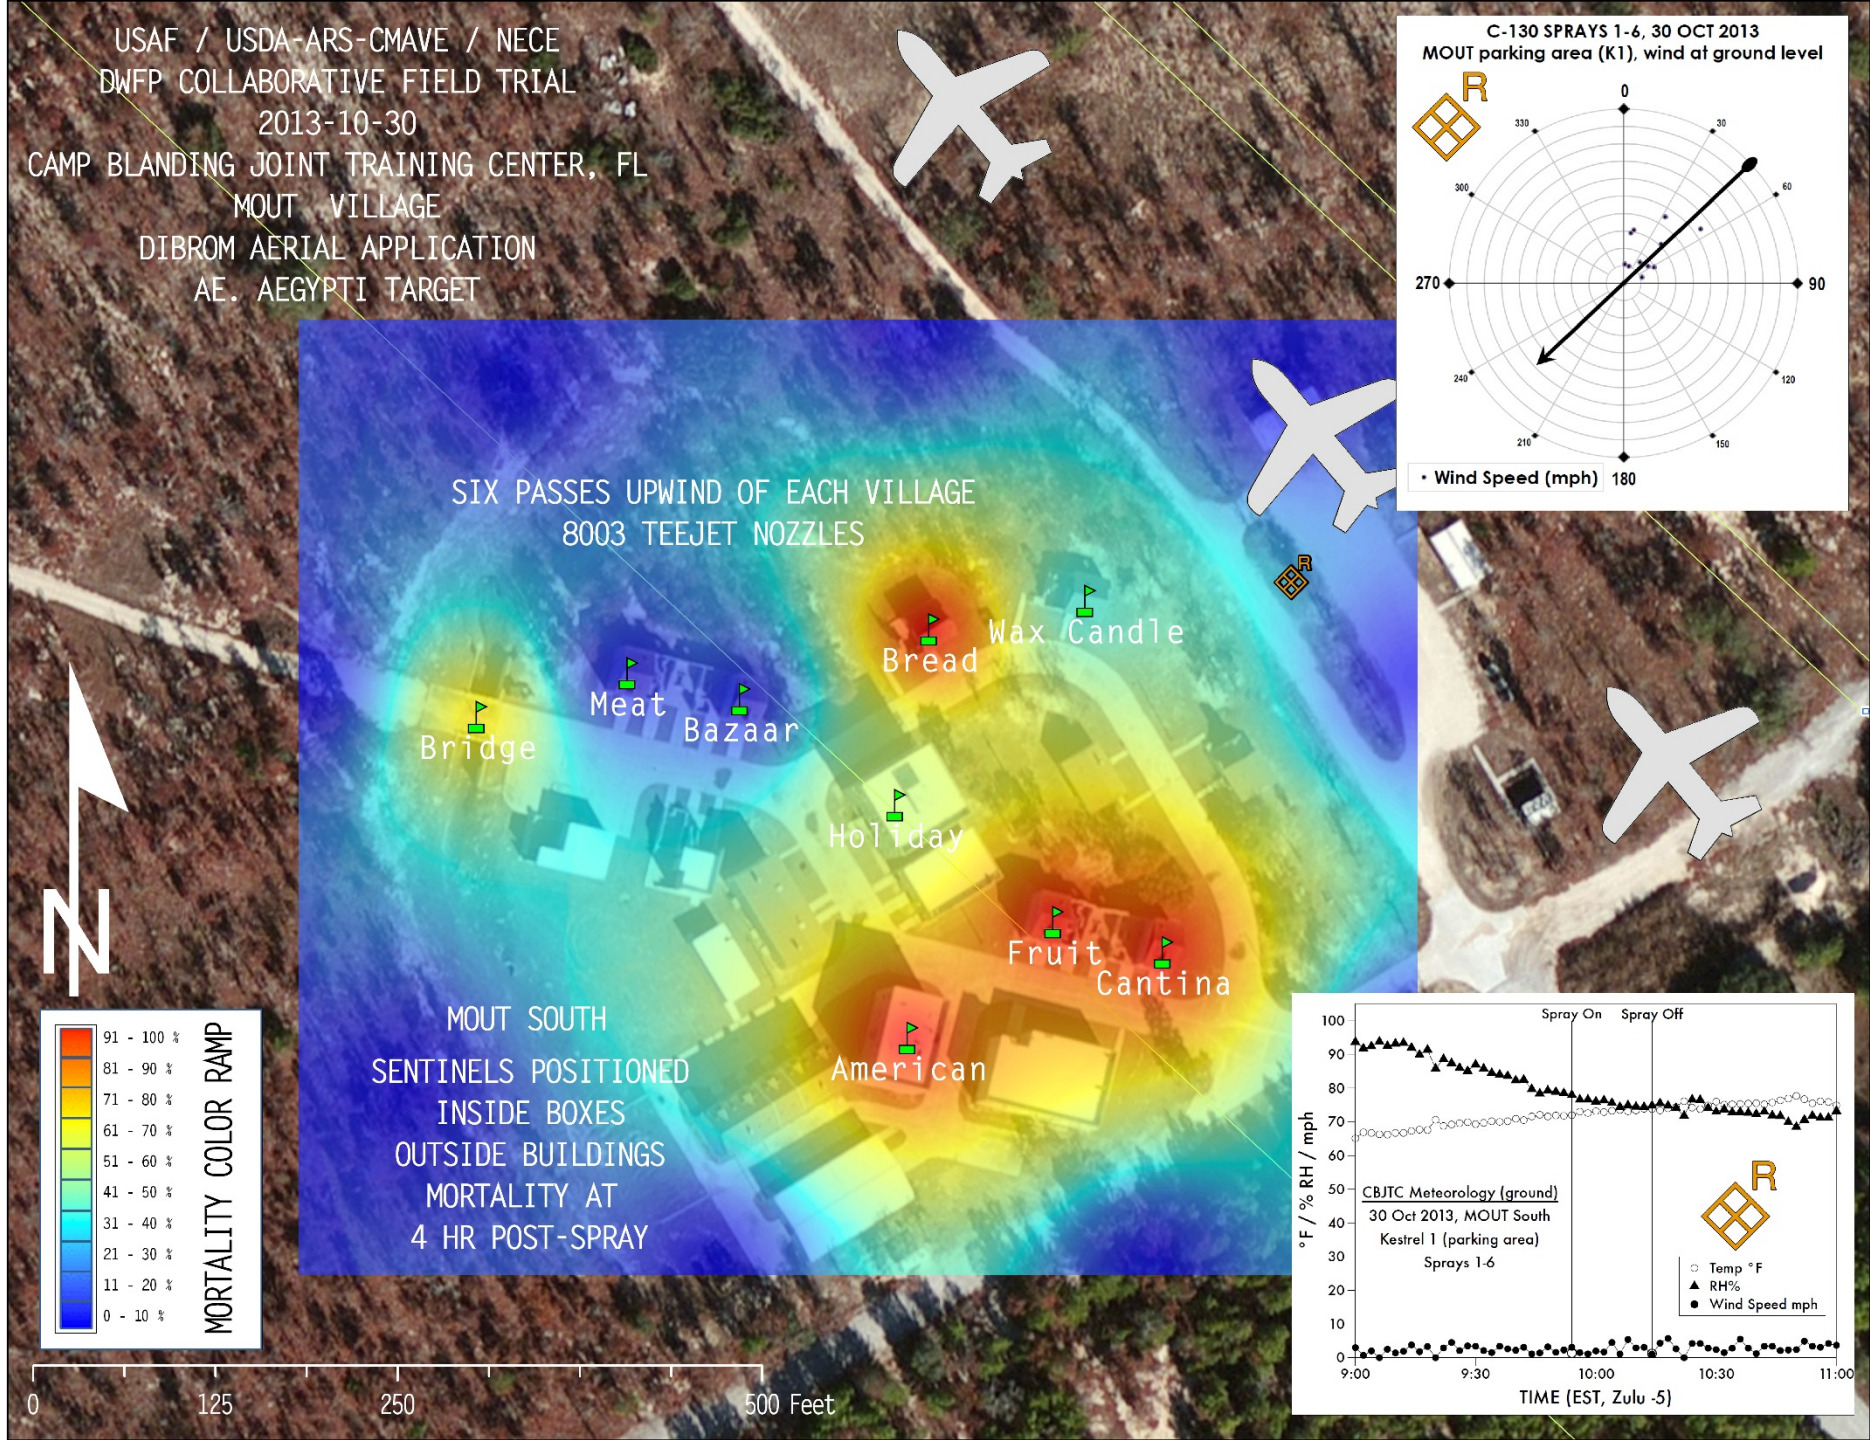



**Figure S15**  
 30 October 2013  
 8003 nozzles  
 MOUT South  
 12 hr mortality  
 Outdoors **IN BOX**

USAF / USDA-ARS-CMAVE / NECE  
 DWFP COLLABORATIVE FIELD TRIAL  
 2013-10-30  
 CAMP BLANDING JOINT TRAINING CENTER, FL  
 MOUT VILLAGE  
 DIBROM AERIAL APPLICATION  
 AE. AEGYPTI TARGET

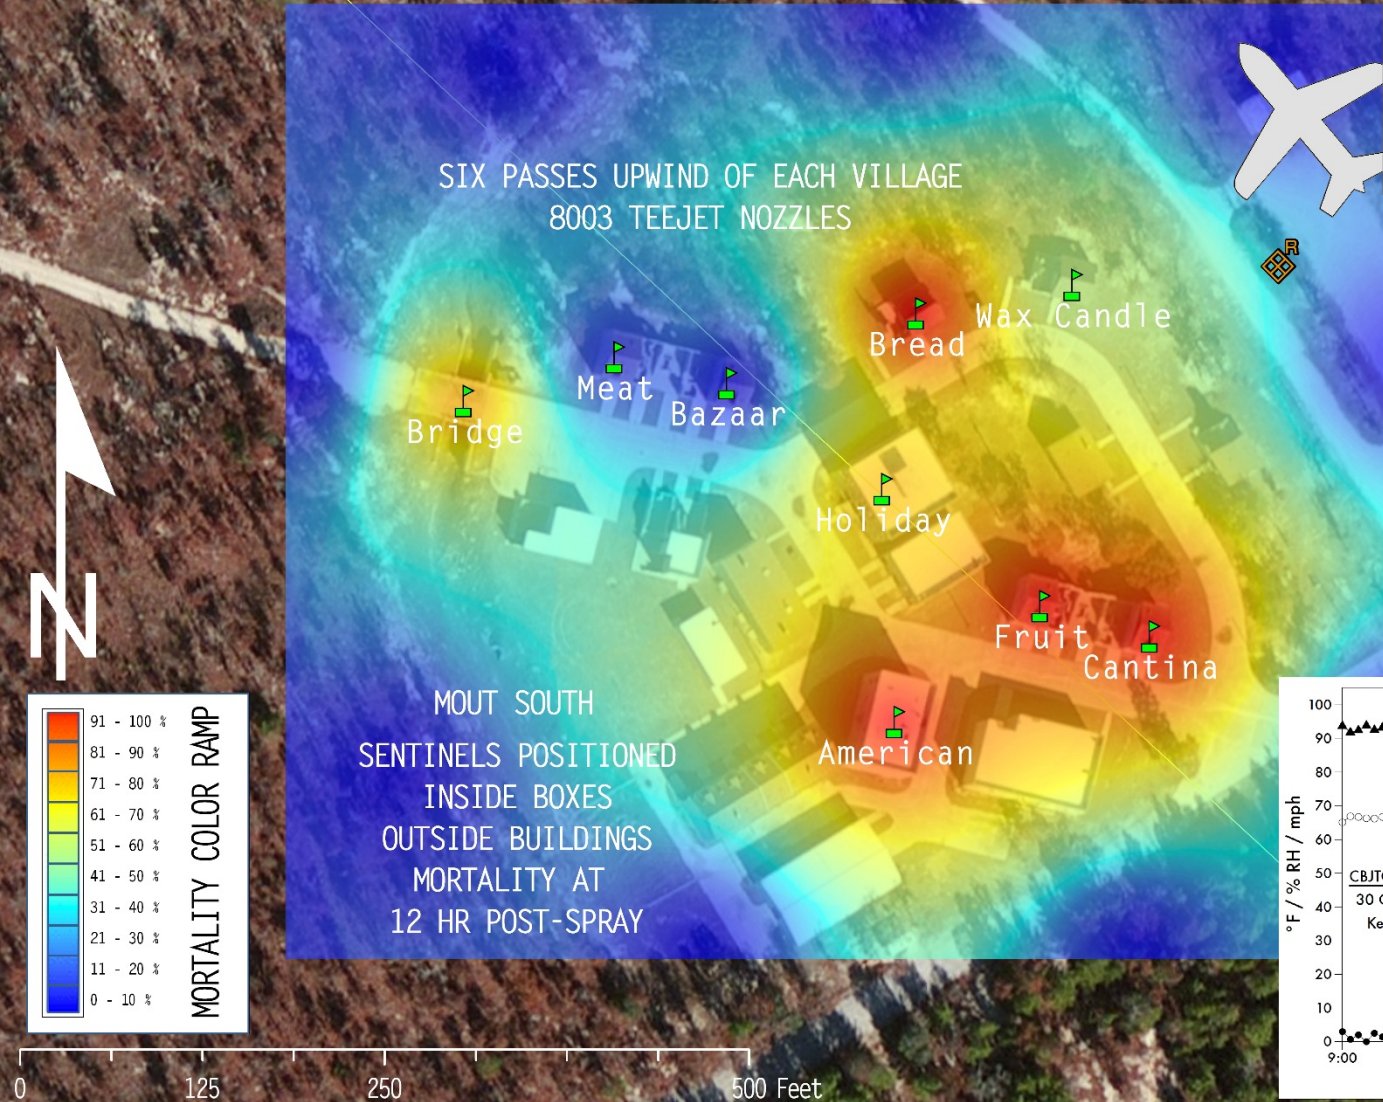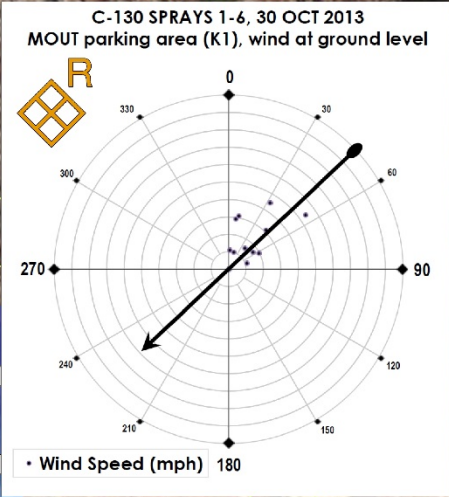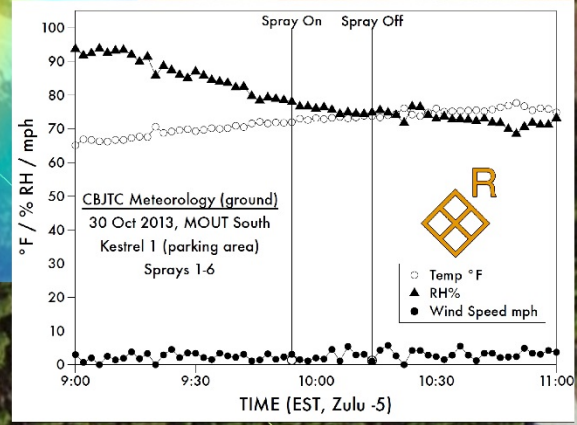

**Figure S16**  
 30 October 2013  
 8003 nozzles  
 MOUT South  
 1 hr mortality  
 Outdoors **ON POLE**

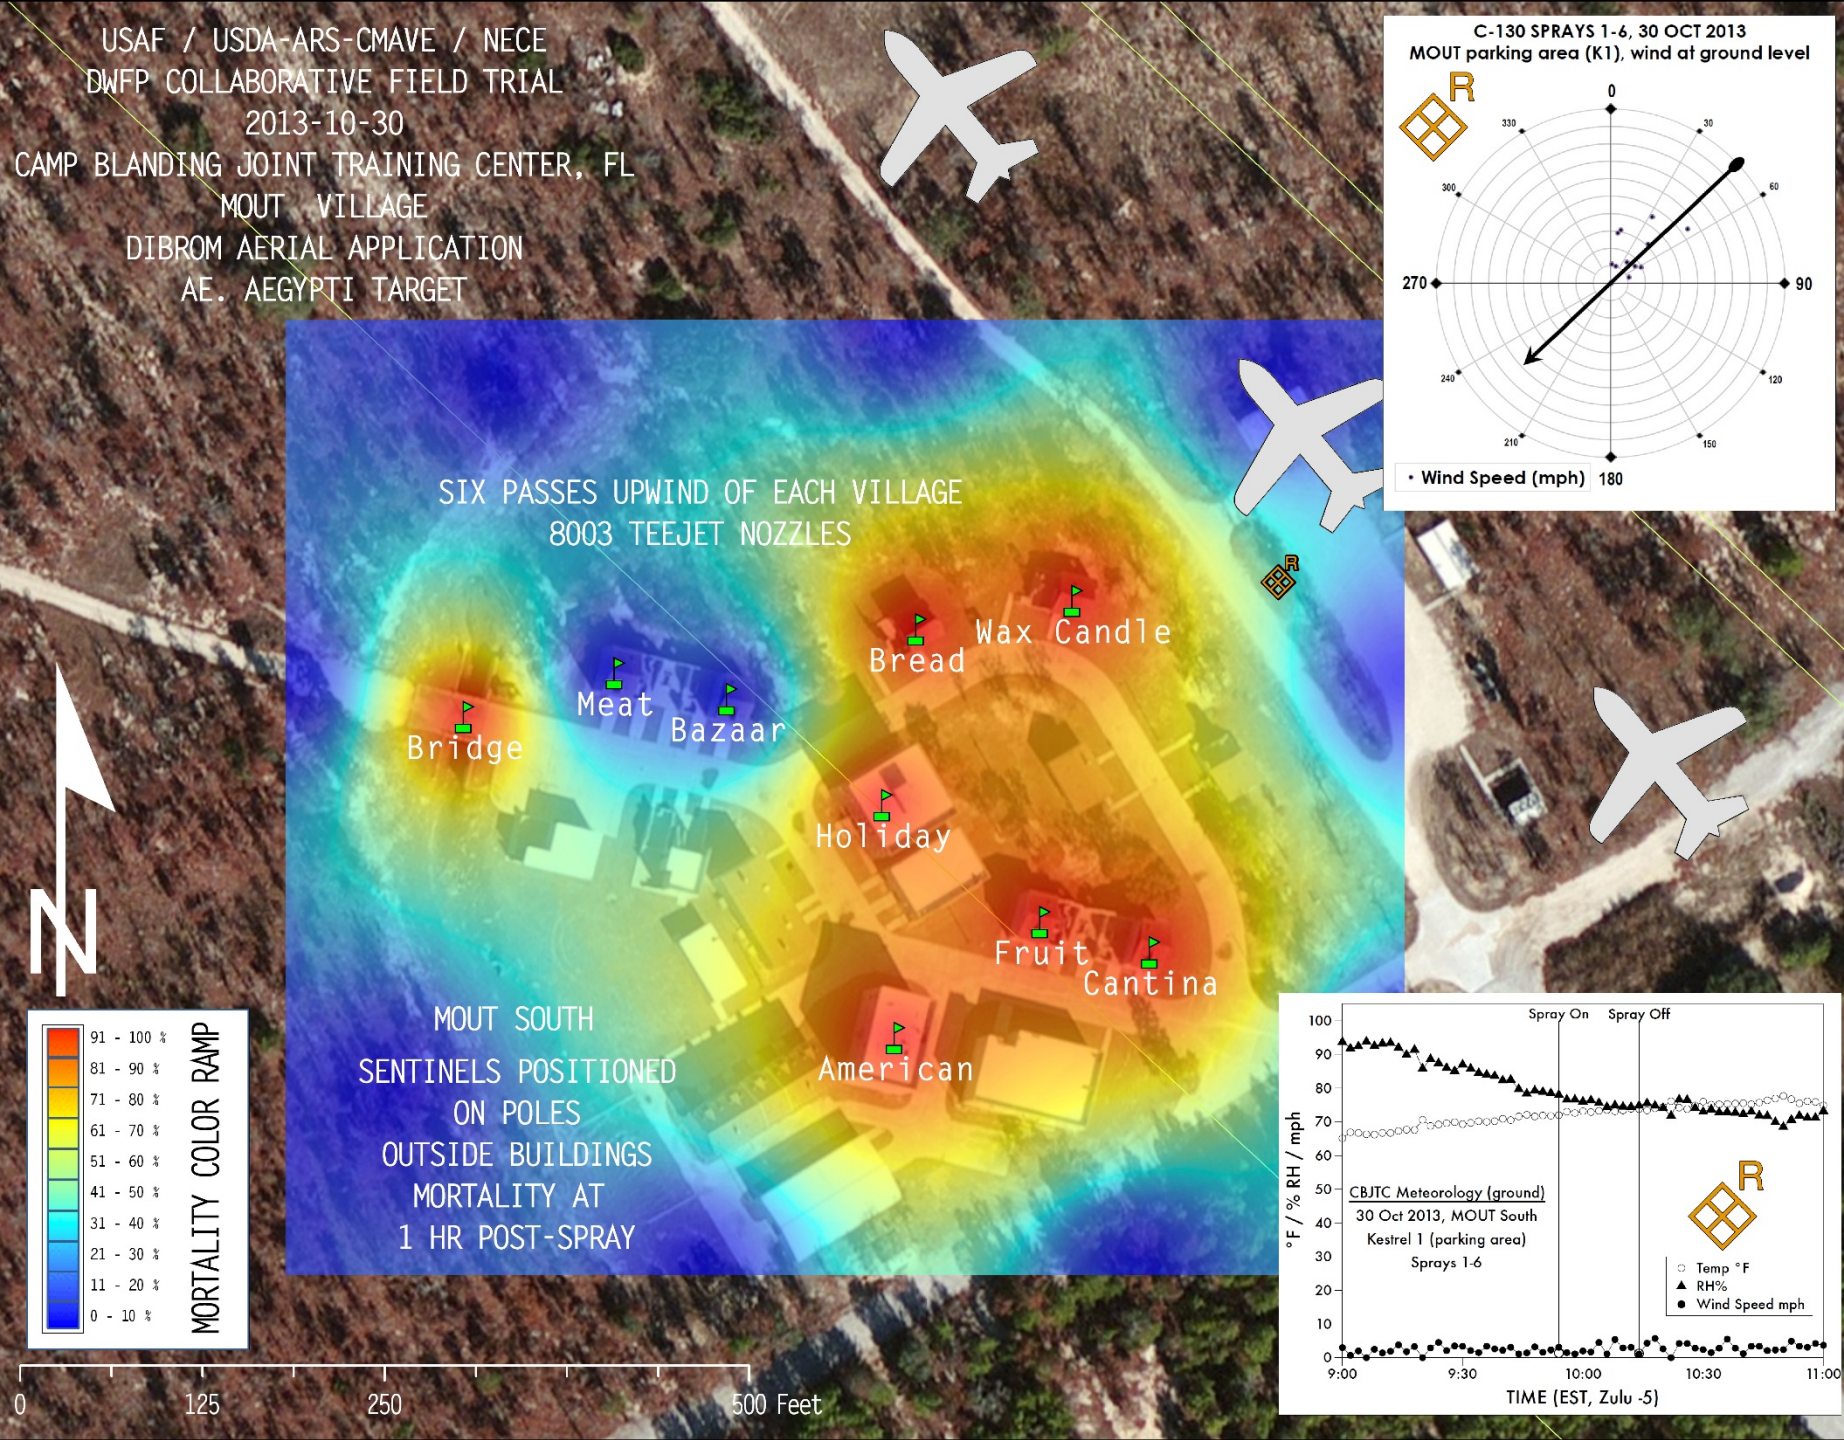

**Figure S17**  
 30 October 2013  
 8003 nozzles  
 MOUT South  
 4 hr mortality  
 Outdoors **ON POLE**

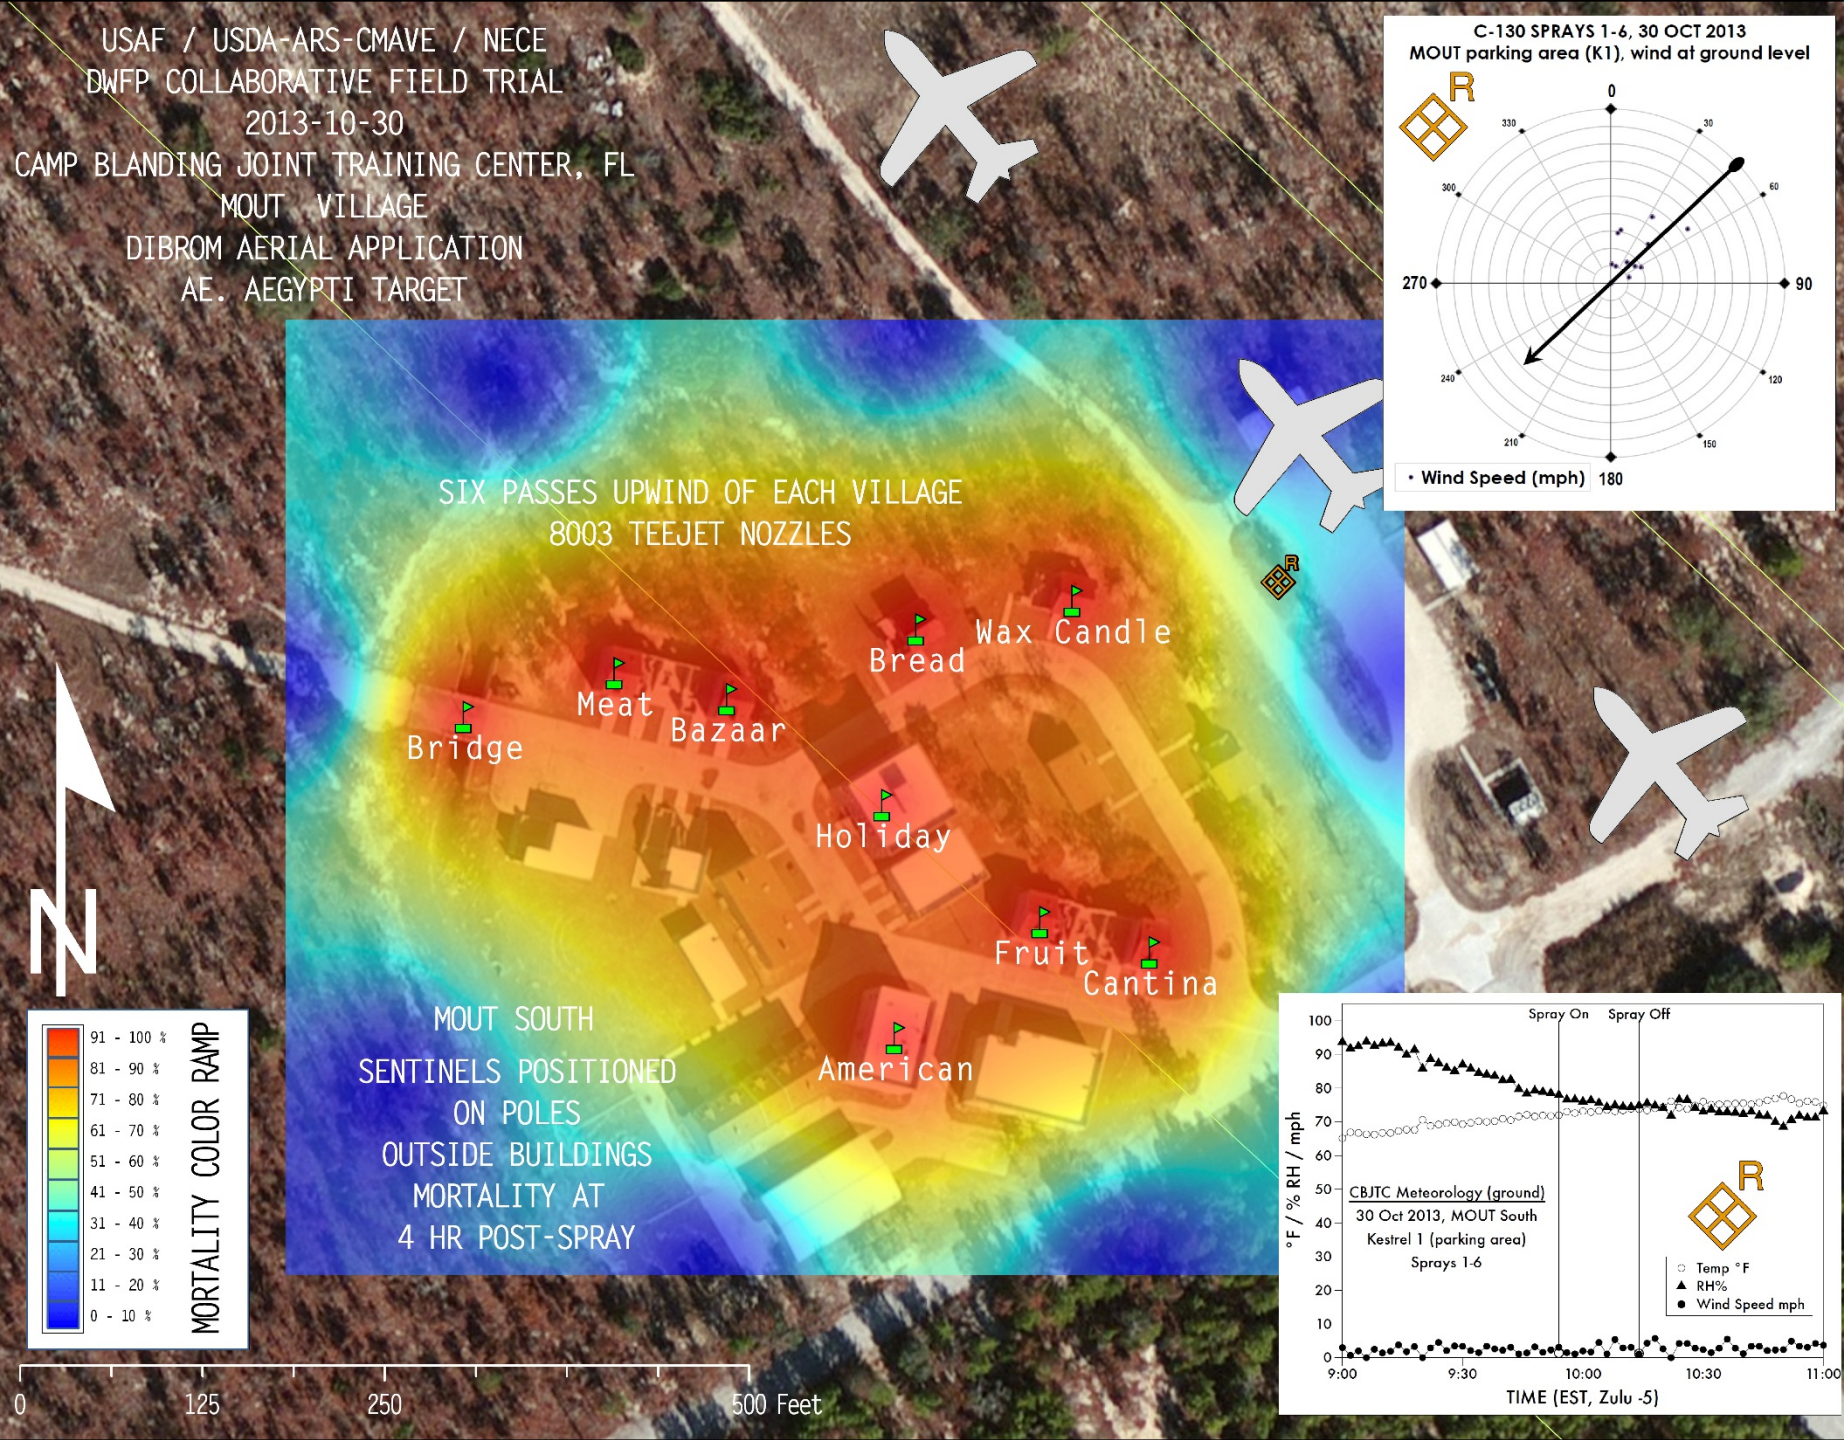

**Figure S18**  
 30 October 2013  
 8003 nozzles  
 MOUT South  
 12 hr mortality  
 Outdoors **ON POLE**

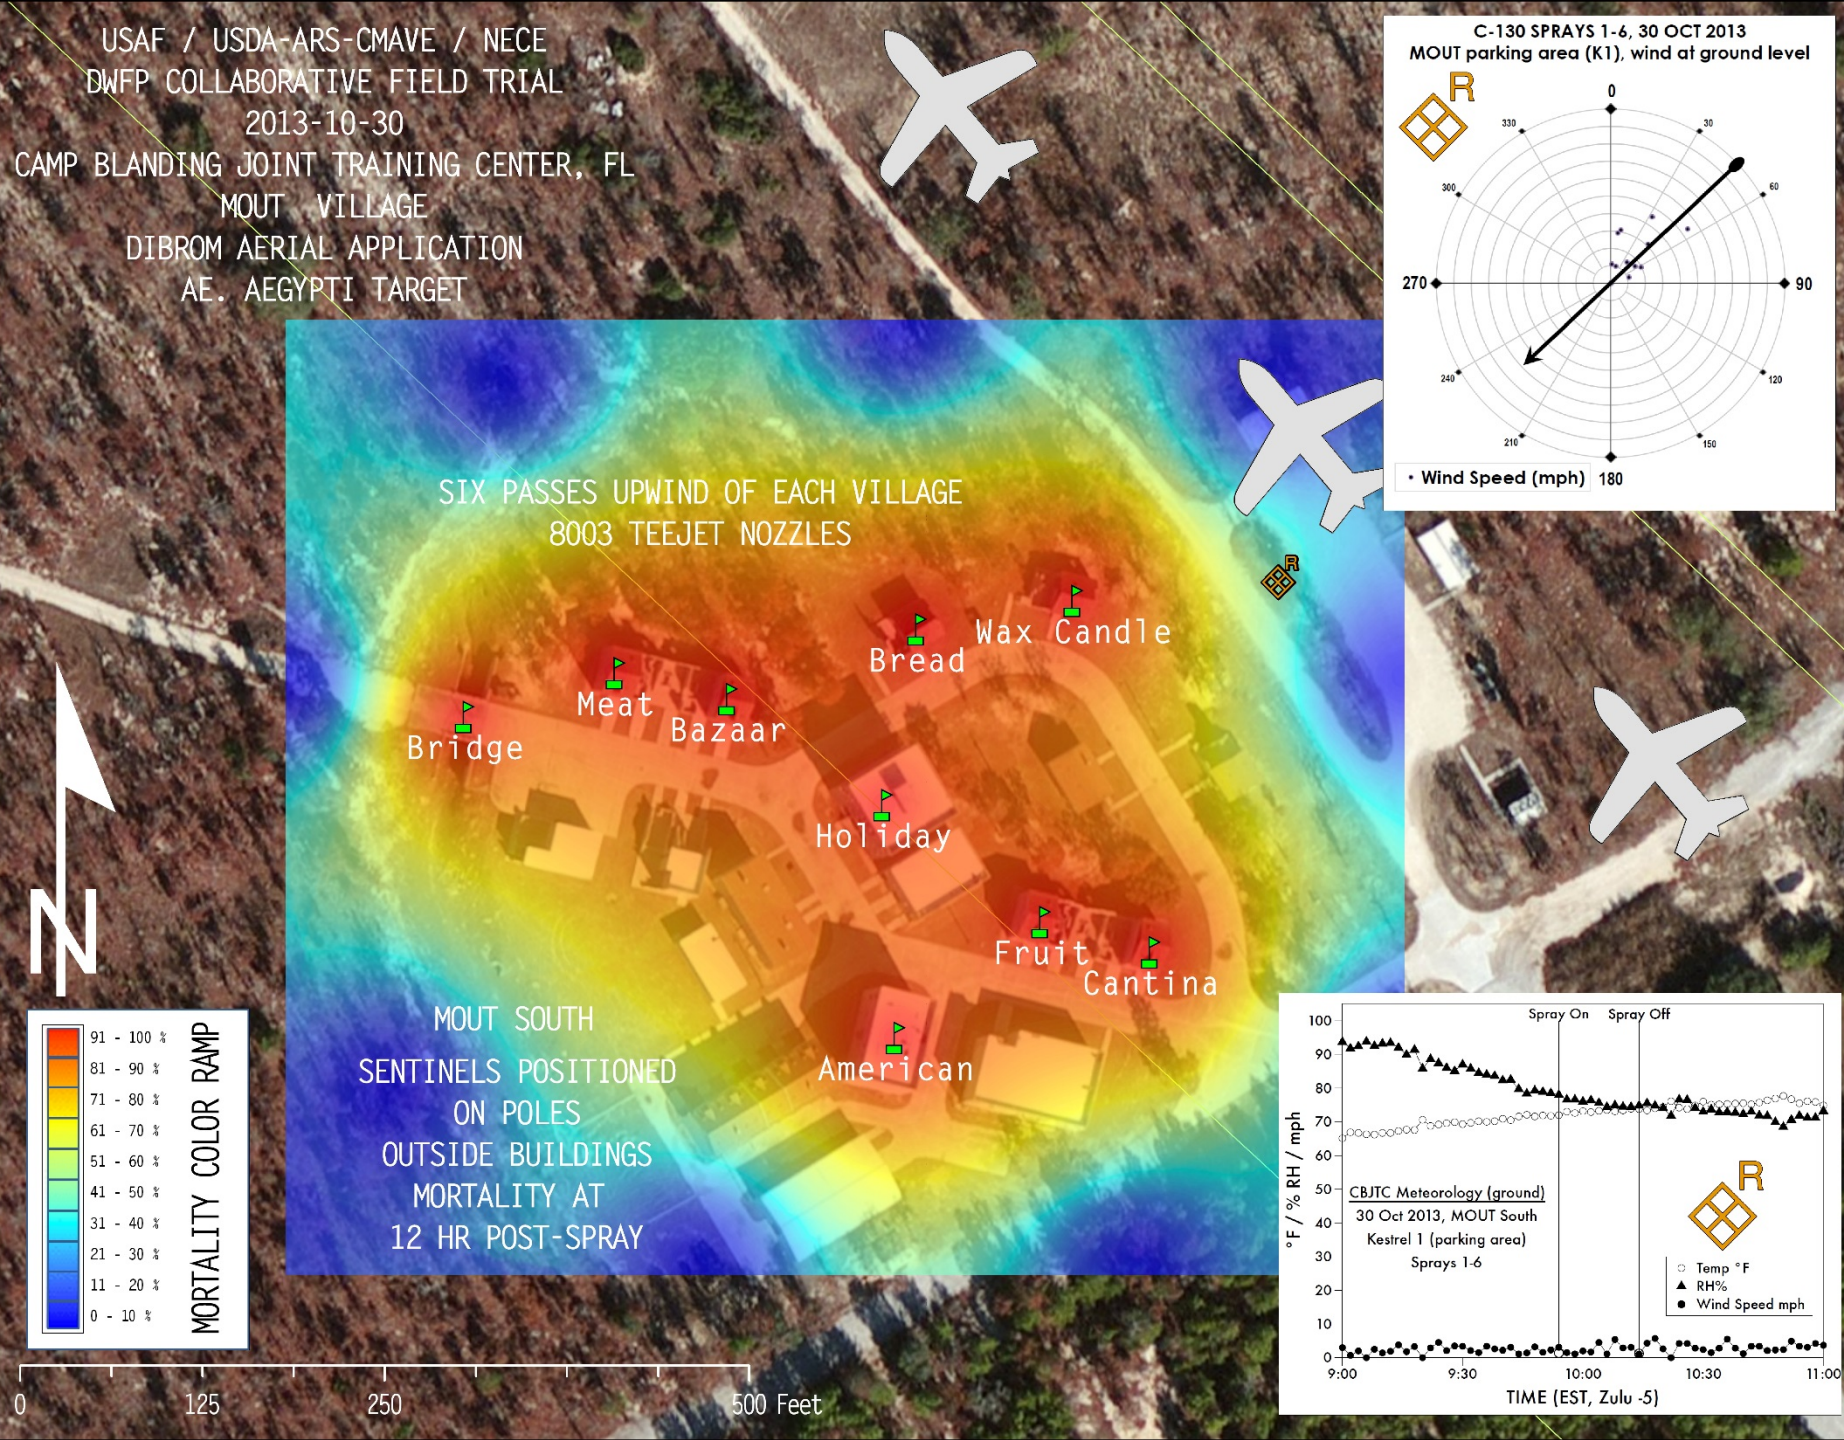

**Figure S19**  
 30 October 2013  
 8003 nozzles  
 MOUT South  
 1 hr mortality  
 Indoors **IN BOX**

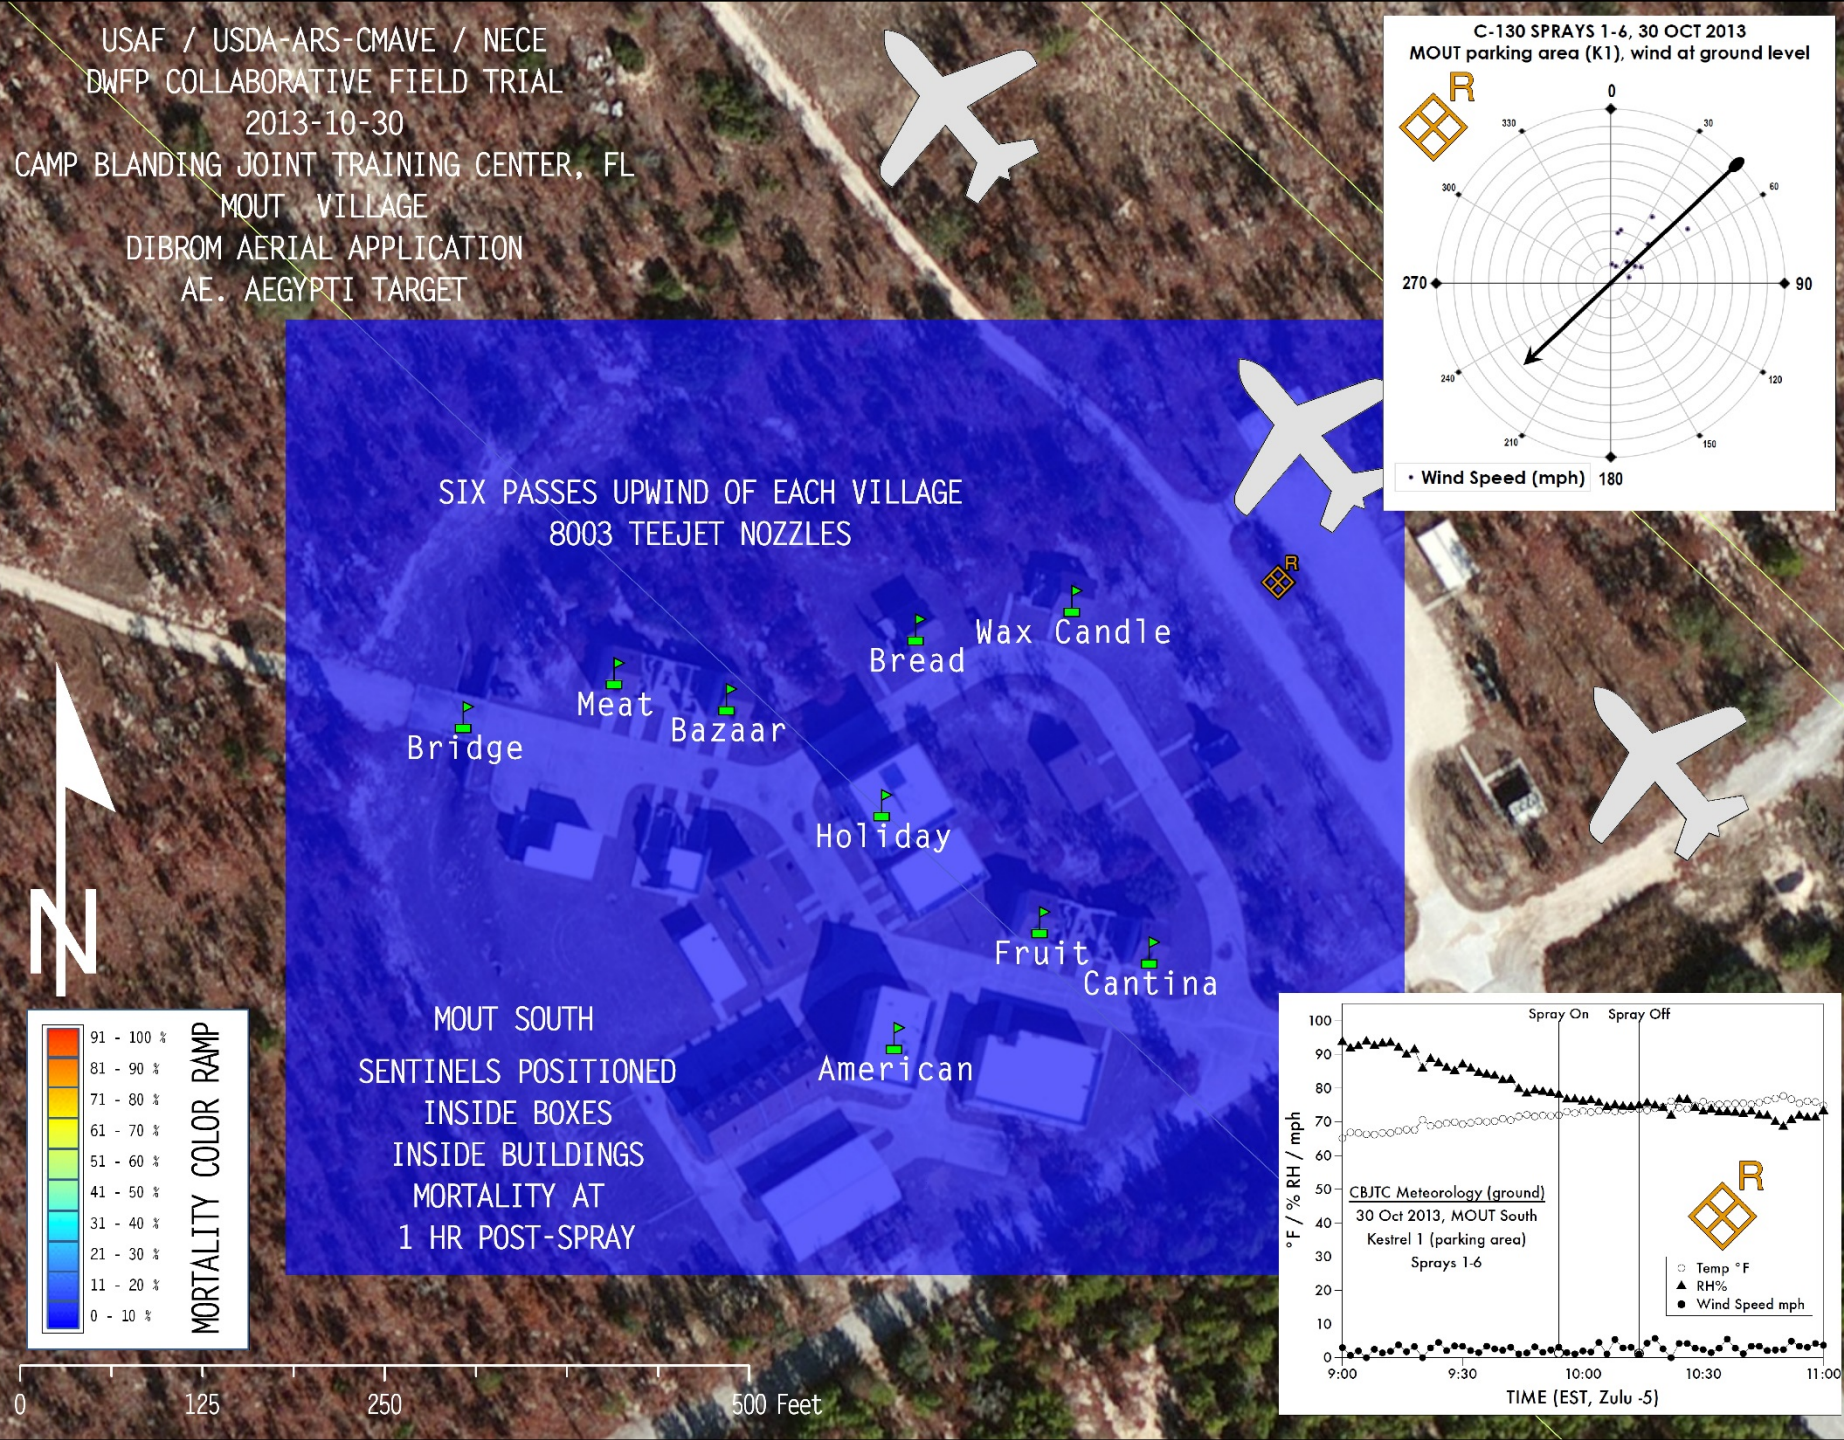

**Figure S20**  
 30 October 2013  
 8003 nozzles  
 MOUT South  
 4 hr mortality  
 Indoors **IN BOX**

USAF / USDA-ARS-CMAVE / NECE  
 DWFP COLLABORATIVE FIELD TRIAL  
 2013-10-30  
 CAMP BLANDING JOINT TRAINING CENTER, FL  
 MOUT VILLAGE  
 DIBROM AERIAL APPLICATION  
 AE. AEGYPTI TARGET

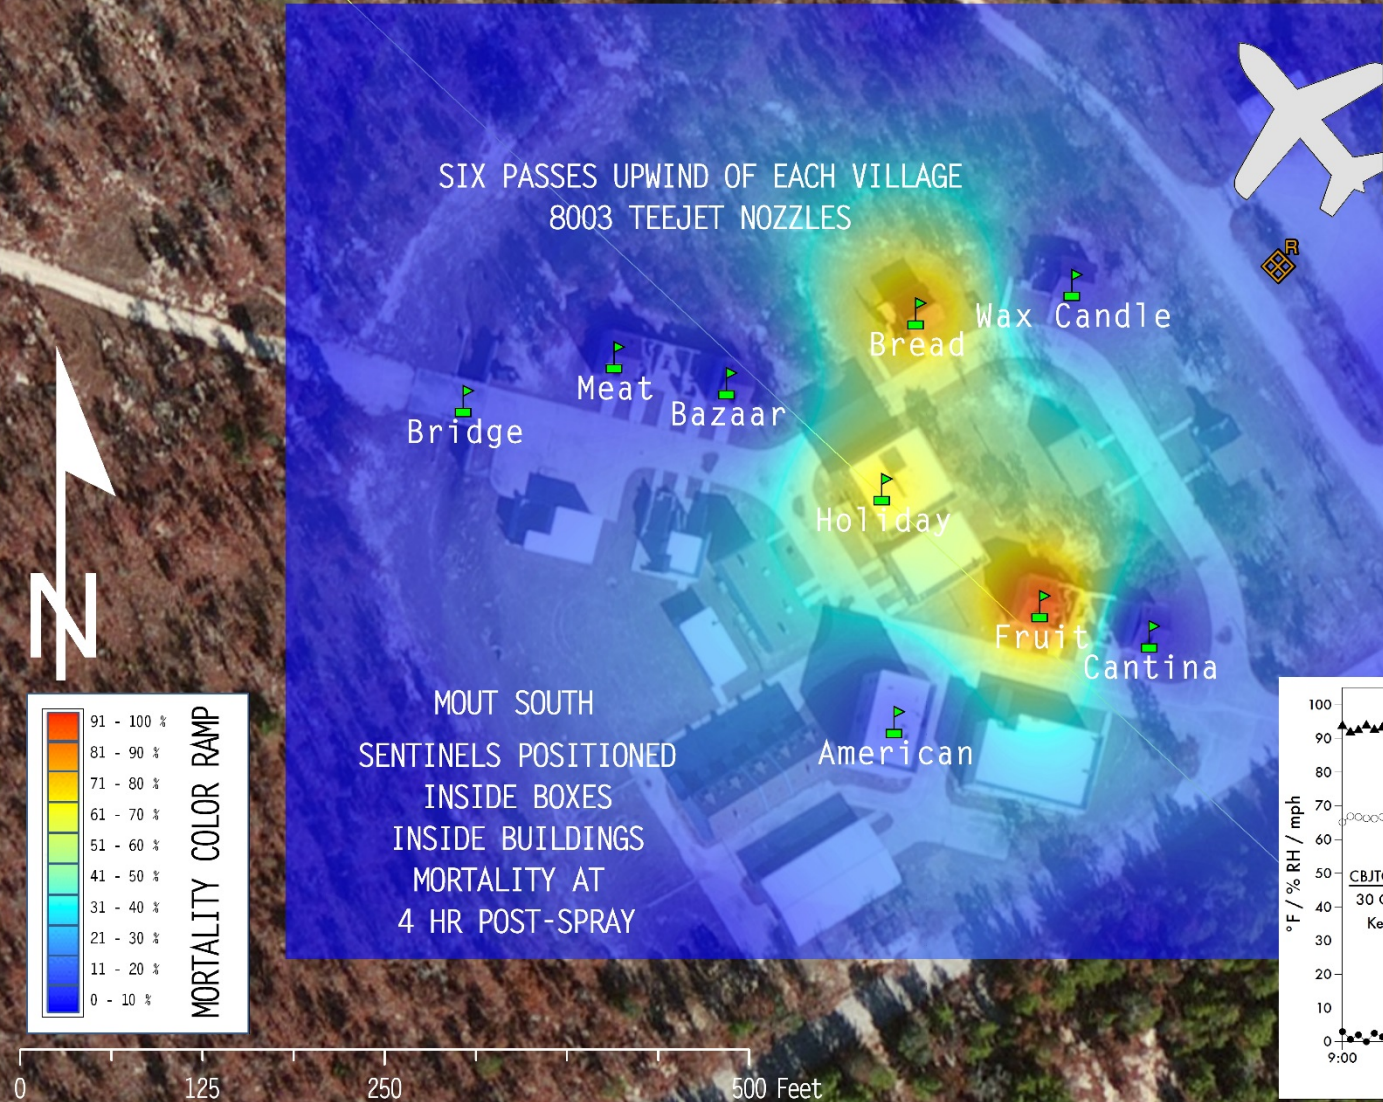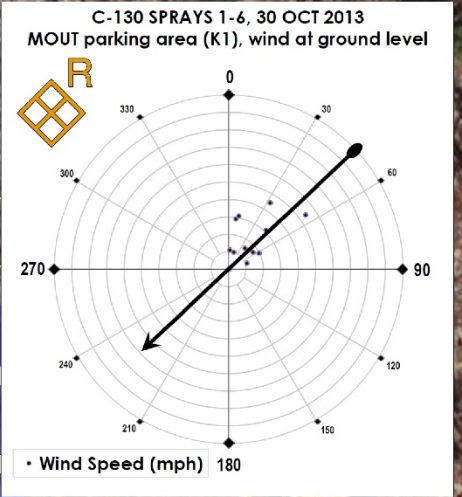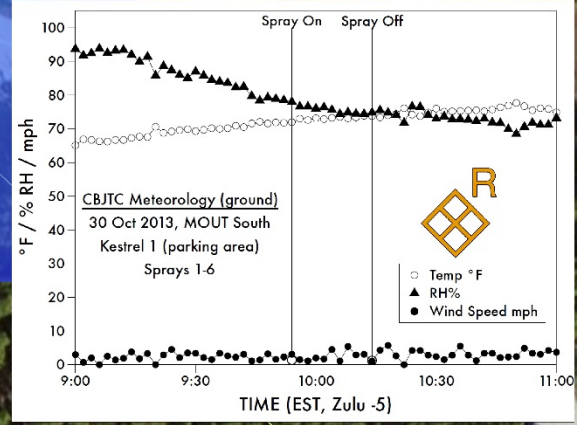

**Figure S2I**  
 30 October 2013  
 8003 nozzles  
 MOUT South  
 12 hr mortality  
 Indoors **IN BOX**

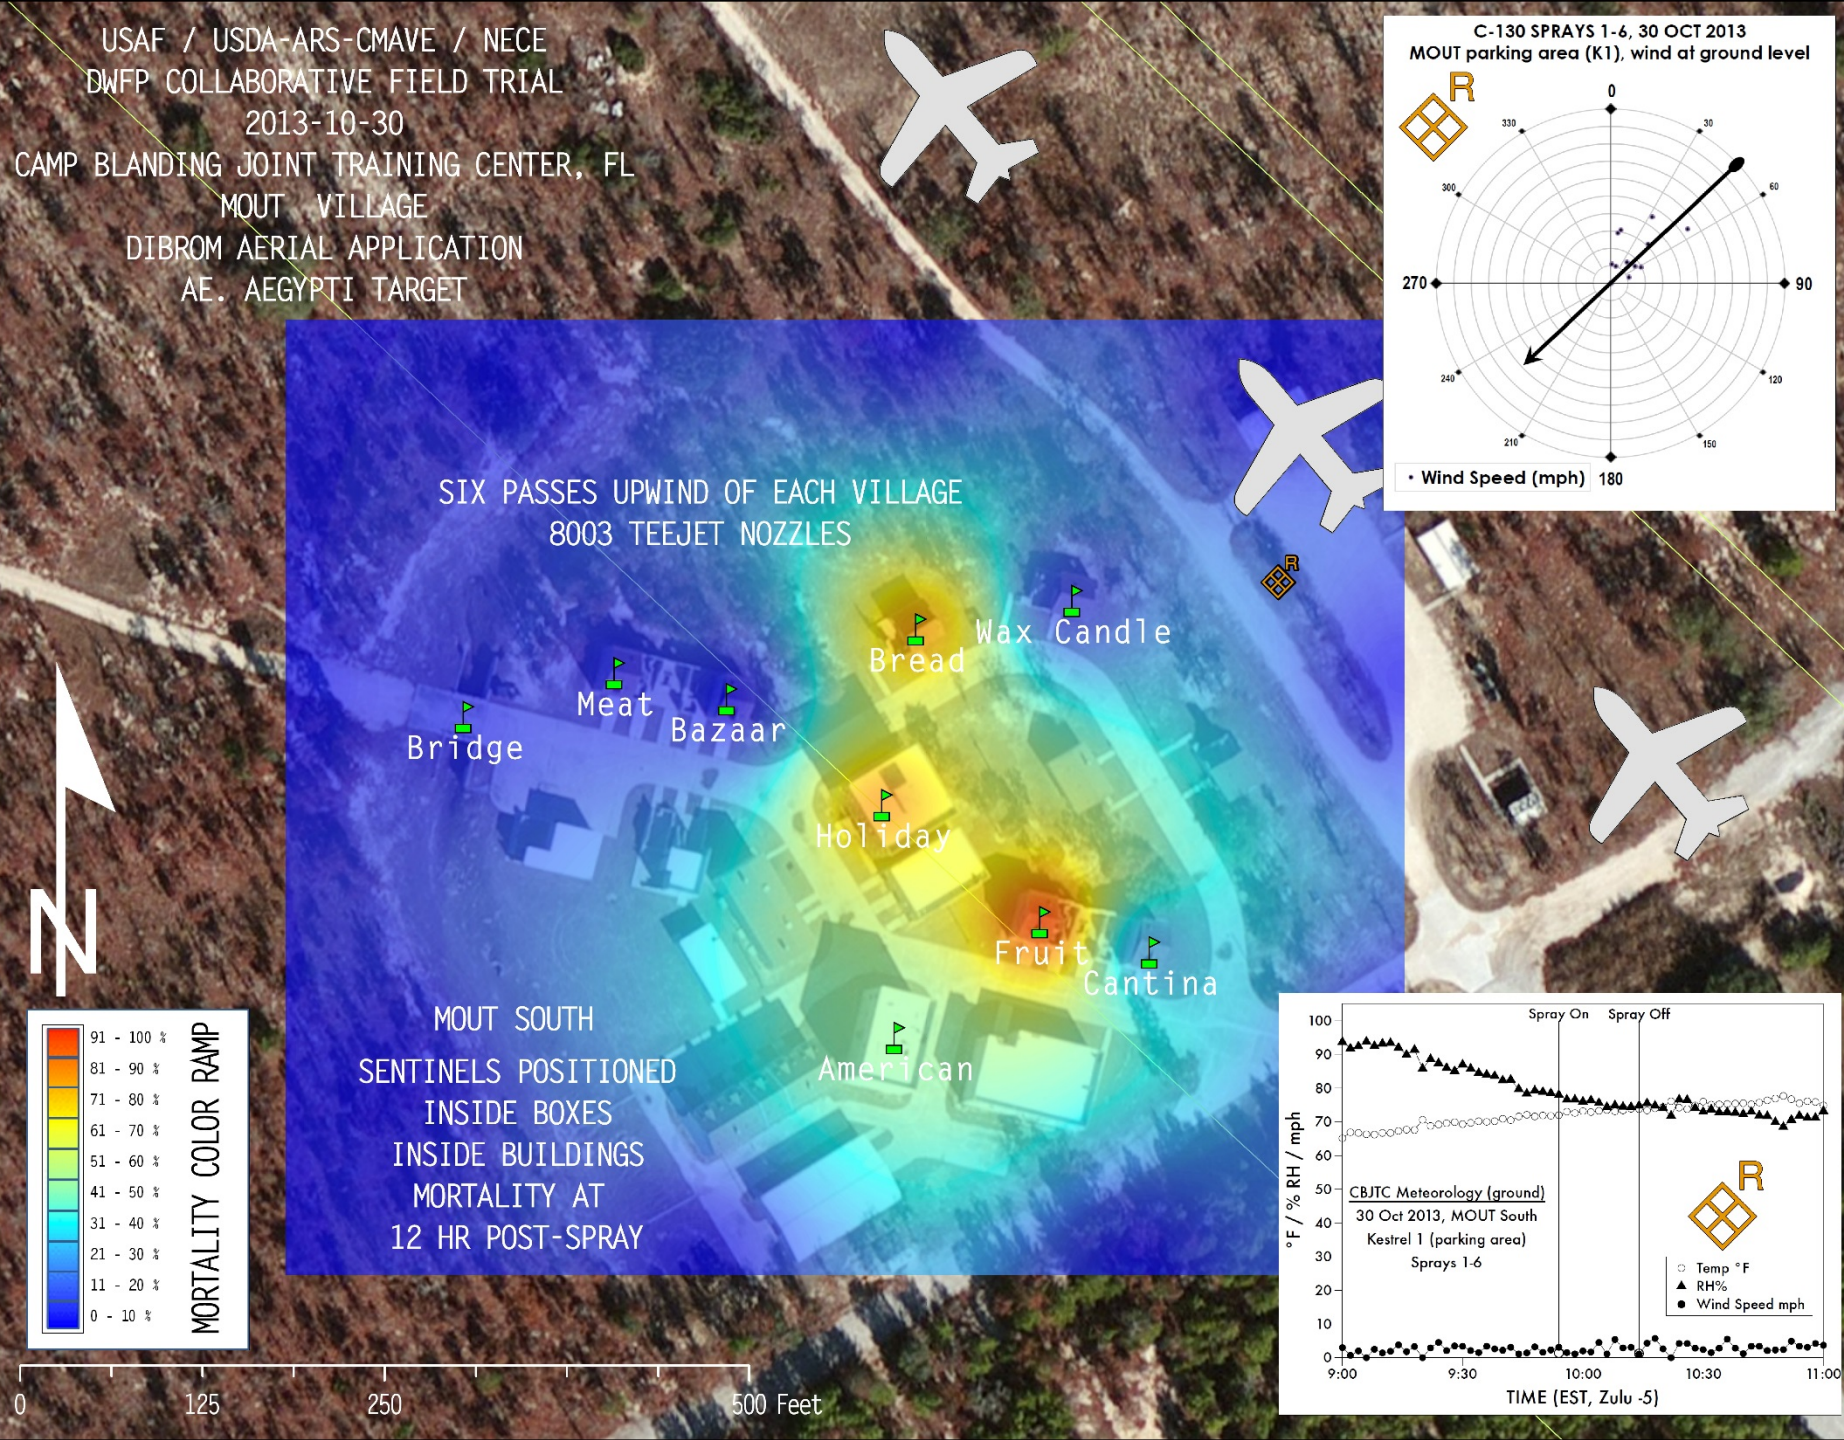

**Figure S22**  
 30 October 2013  
 8003 nozzles  
 MOUT South  
 1 hr mortality  
 Indoors **ON FLOOR**

USAF / USDA-ARS-CMAVE / NECE  
 DWFP COLLABORATIVE FIELD TRIAL  
 2013-10-30  
 CAMP BLANDING JOINT TRAINING CENTER, FL  
 MOUT VILLAGE  
 DIBROM AERIAL APPLICATION  
 AE. AEGYPTI TARGET

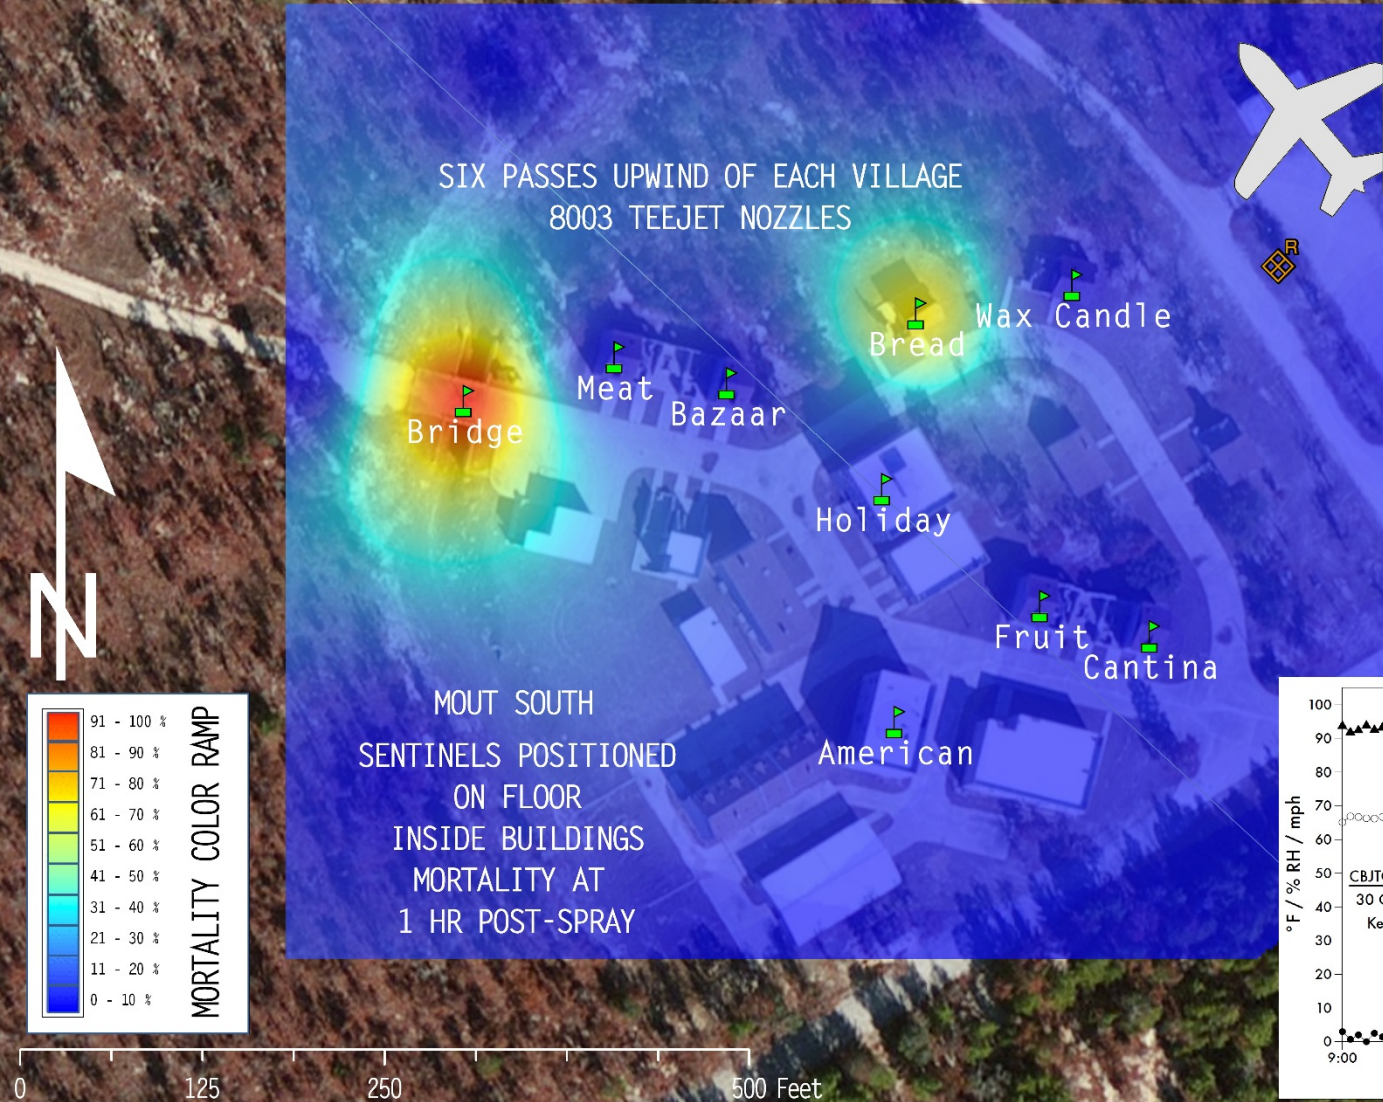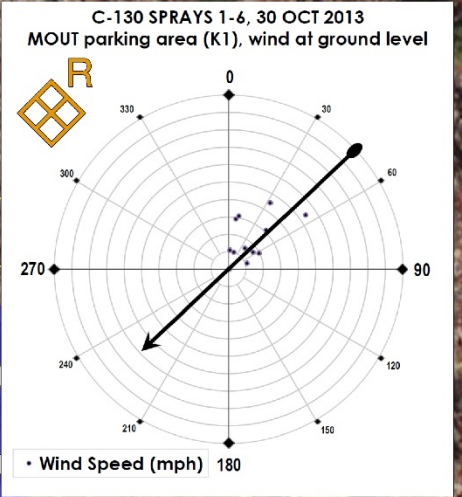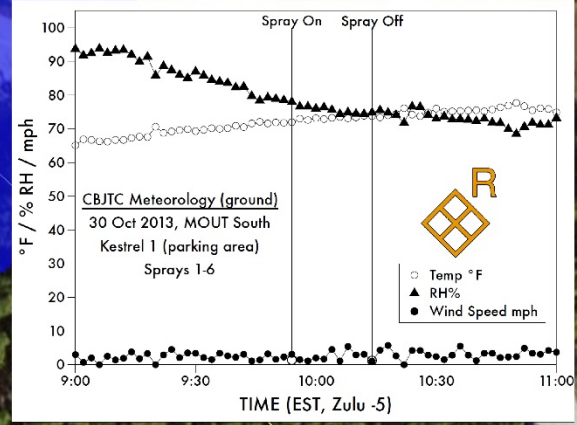



**Figure S23**  
 30 October 2013  
 8003 nozzles  
 MOUT South  
 4 hr mortality  
 Indoors **ON FLOOR**

USAF / USDA-ARS-CMAVE / NECE  
 DWFP COLLABORATIVE FIELD TRIAL  
 2013-10-30  
 CAMP BLANDING JOINT TRAINING CENTER, FL  
 MOUT VILLAGE  
 DIBROM AERIAL APPLICATION  
 AE. AEGYPTI TARGET

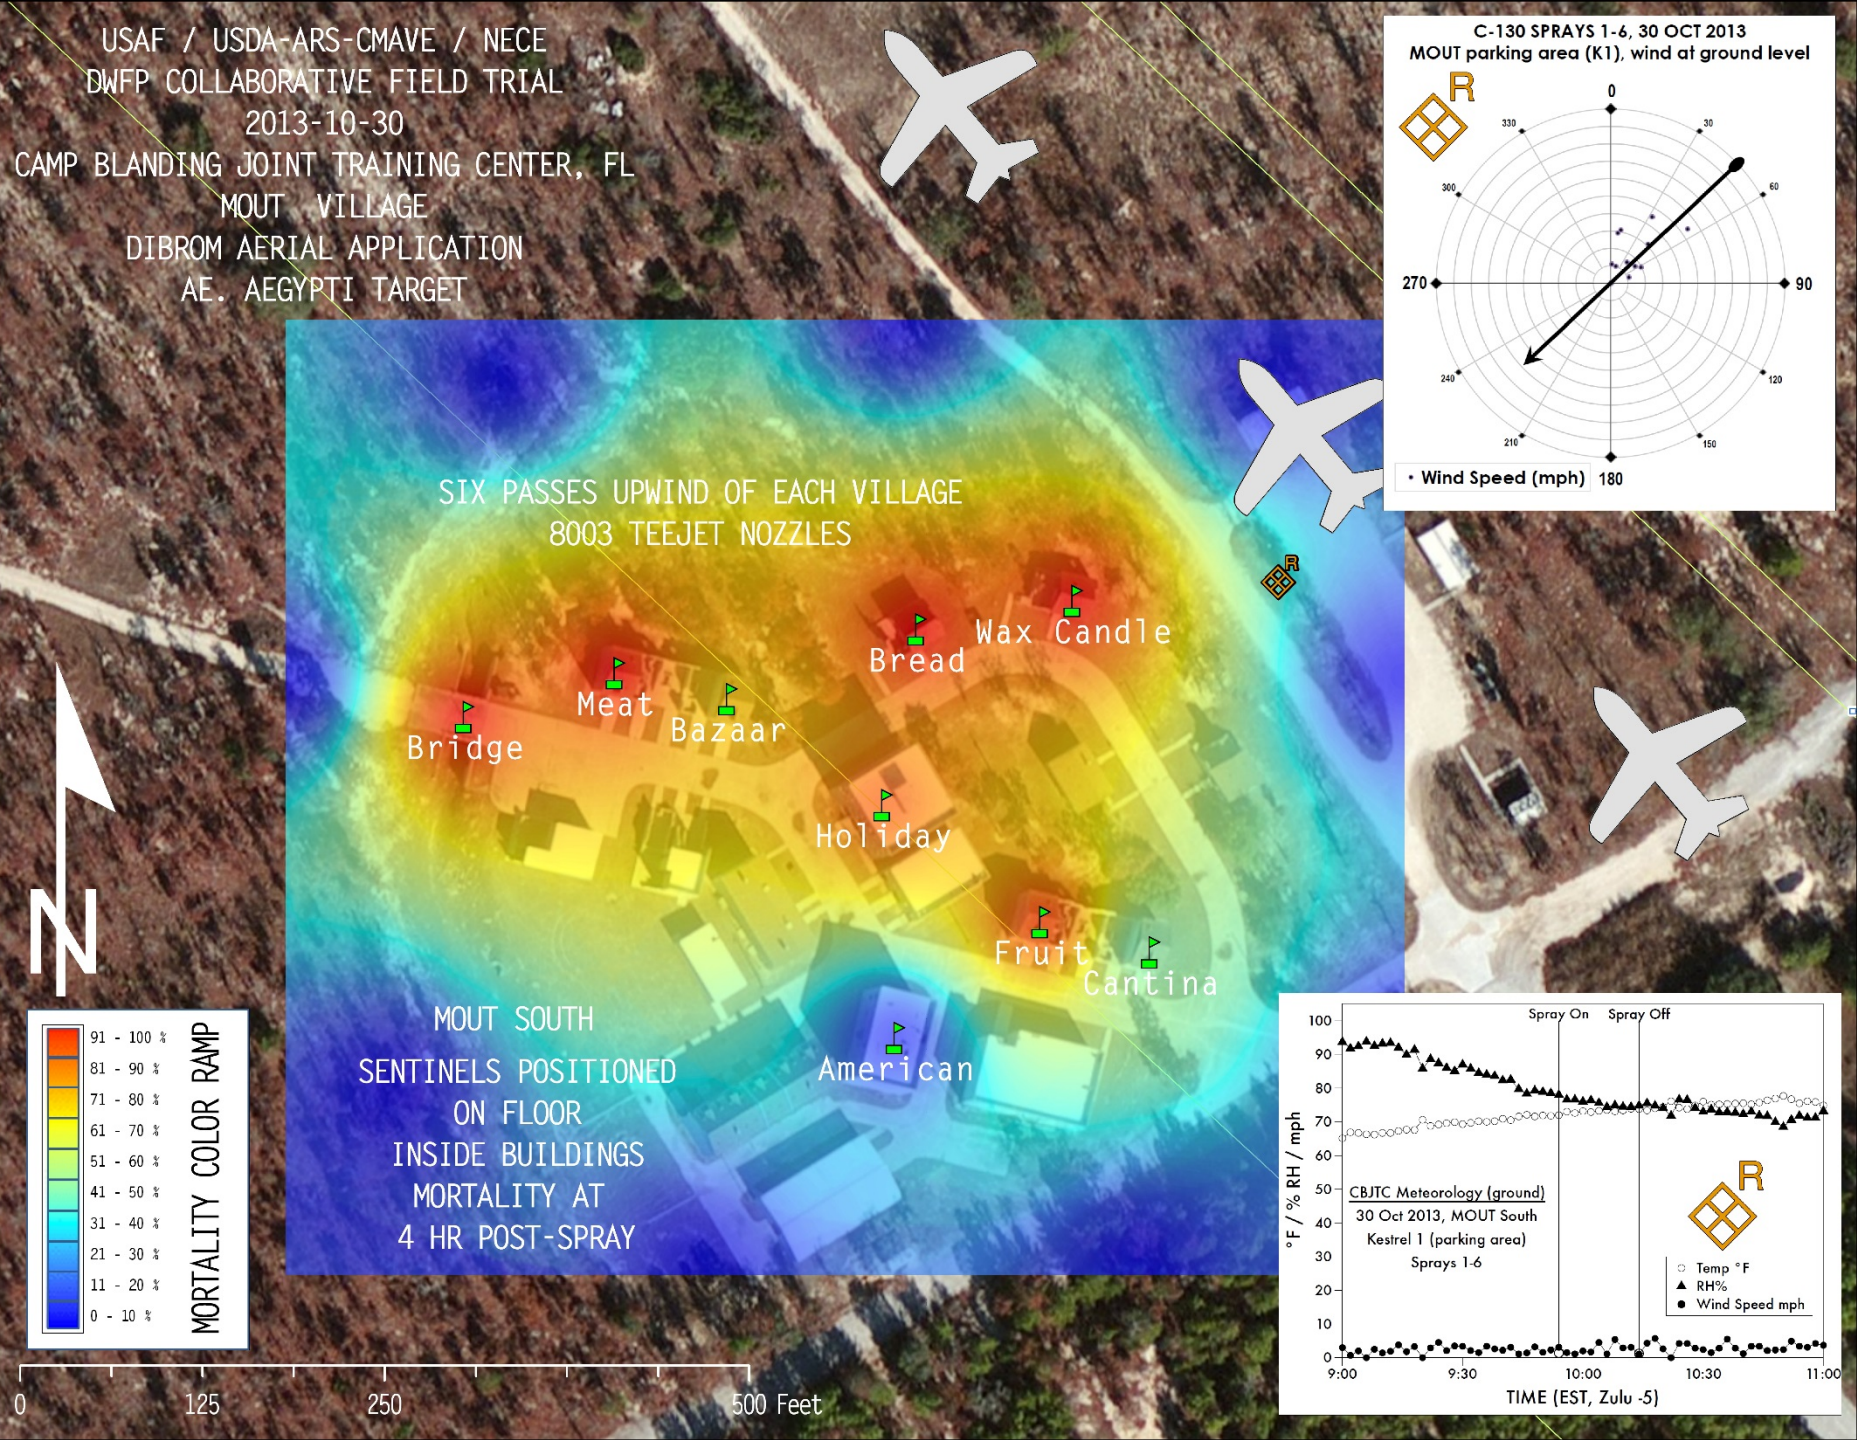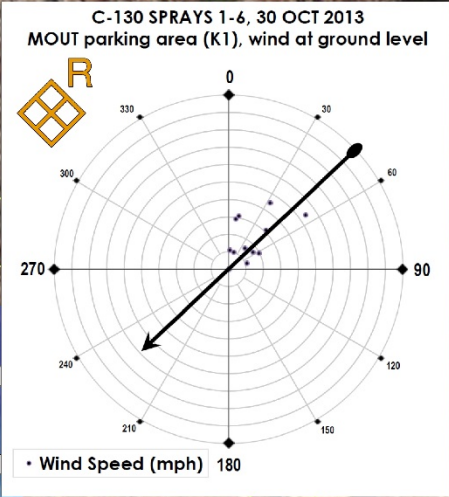

SIX PASSES UPWIND OF EACH VILLAGE  
 8003 TEEJET NOZZLES

MOUT SOUTH  
 SENTINELS POSITIONED  
 ON FLOOR  
 INSIDE BUILDINGS  
 MORTALITY AT  
 4 HR POST-SPRAY

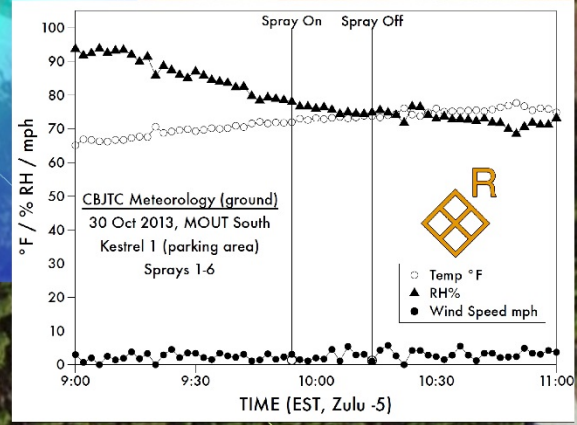

0 125 250 500 Feet

**Figure S24**  
 30 October 2013  
 8003 nozzles  
 MOUT South  
 12 hr mortality  
 Indoors **ON FLOOR**

USAF / USDA-ARS-CMAVE / NECE  
 DWFP COLLABORATIVE FIELD TRIAL  
 2013-10-30  
 CAMP BLANDING JOINT TRAINING CENTER, FL  
 MOUT VILLAGE  
 DIBROM AERIAL APPLICATION  
 AE. AEGYPTI TARGET

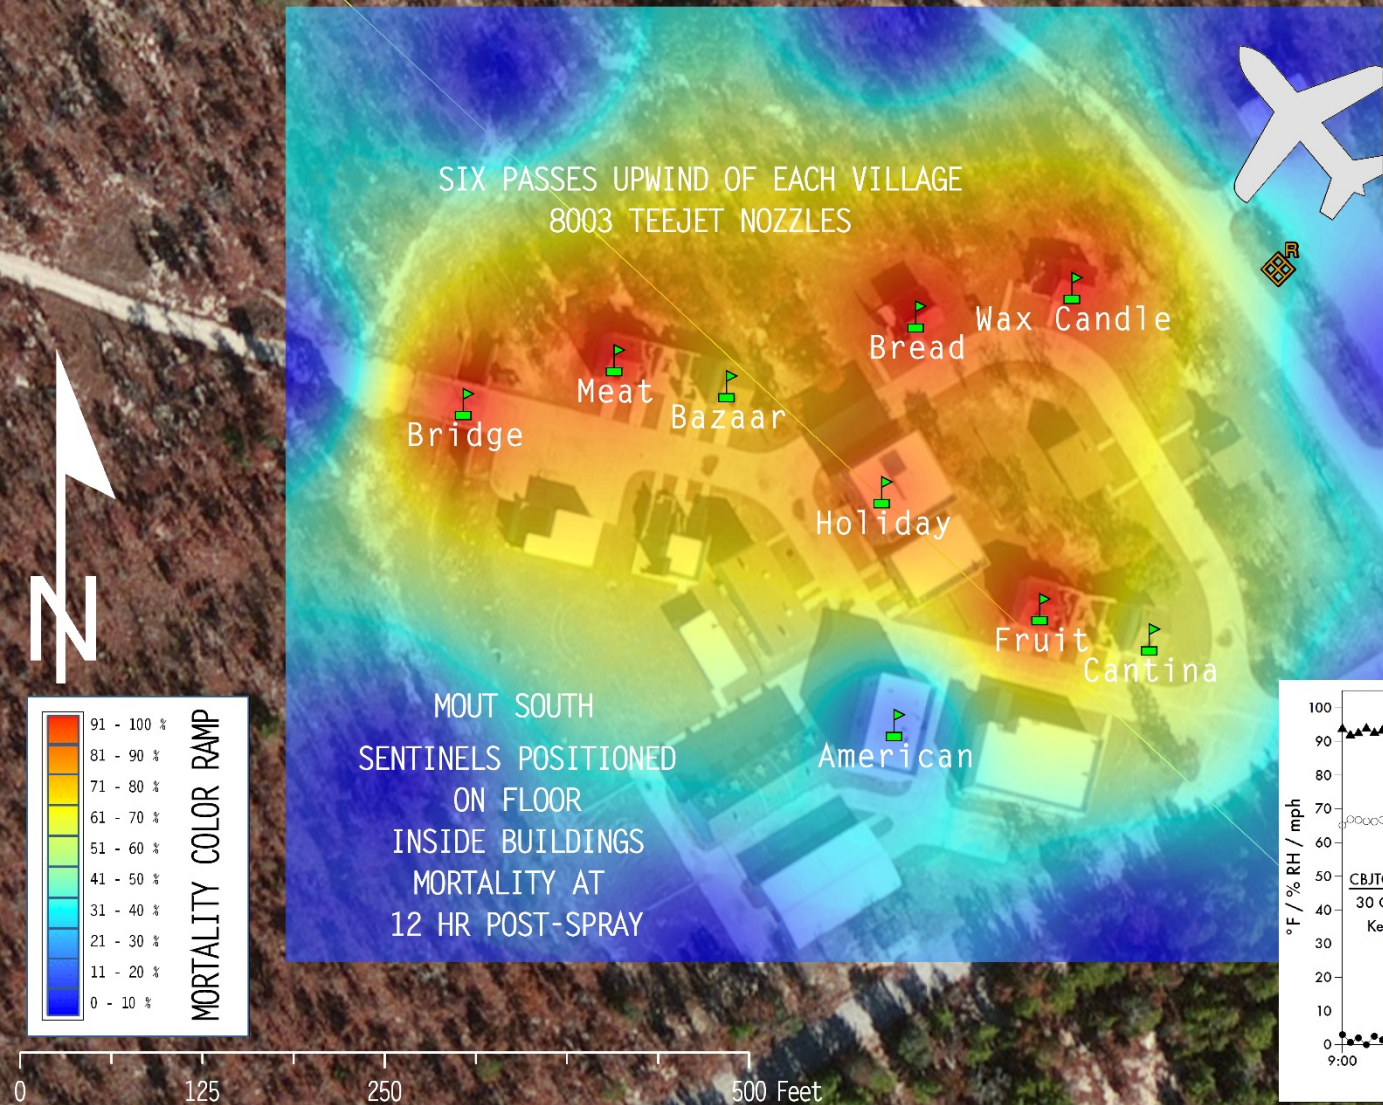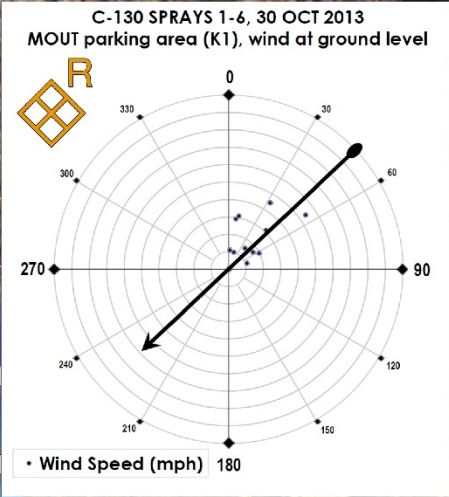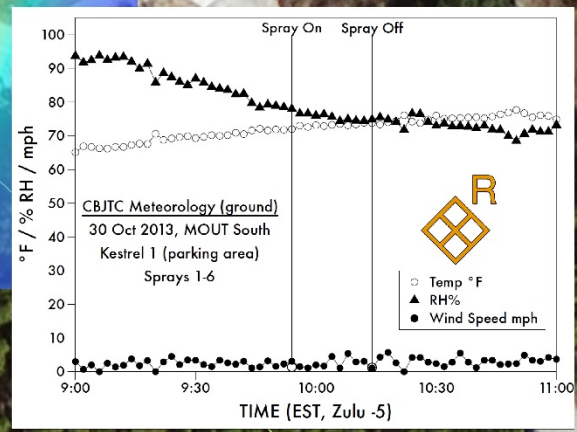

**SET C**

S25–S36 Figs. Naled efficacy (mortality), Village 29 Oct.

**Figure S25**  
 29 October 2013  
 800I nozzles  
 Village  
 1 hr mortality  
 Outdoors **IN BOX**

USAF / USDA-ARS-CMAVE / NECE  
 DWFP COLLABORATIVE FIELD TRIAL  
 2013-10-29  
 CAMP BLANDING JOINT TRAINING CENTER, FL  
**VILLAGE**

**NALED** AERIAL APPLICATION  
 AE. AEGYPTI TARGET

SIX PASSES UPWIND OF EACH VILLAGE  
 8001 TEEJET NOZZLES

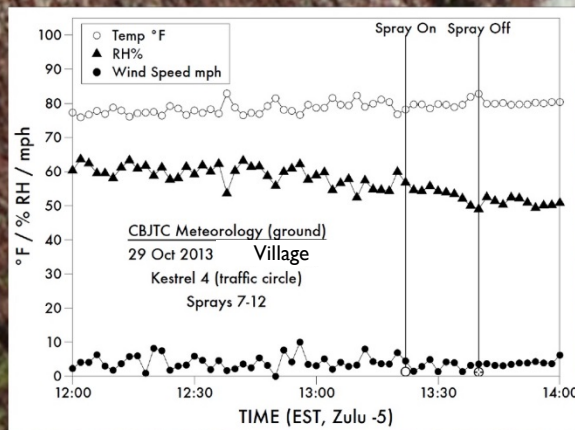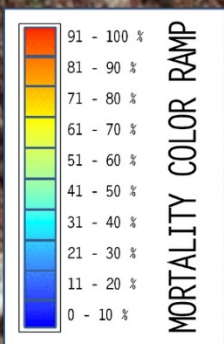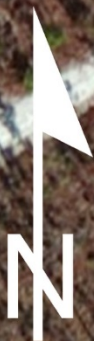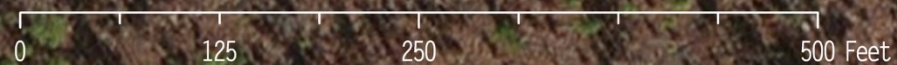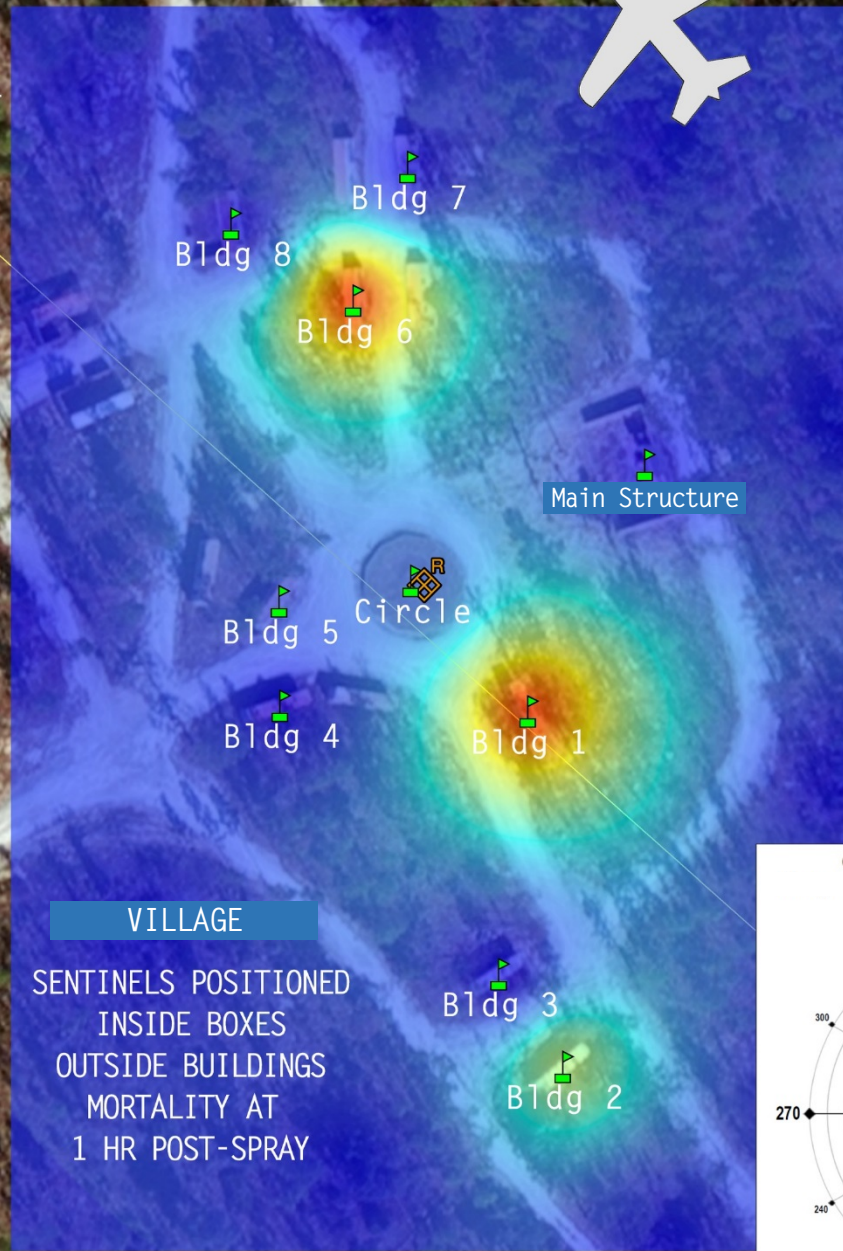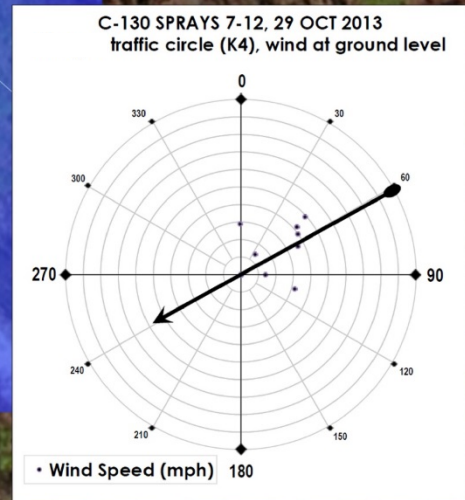

**Figure S26**  
 29 October 2013  
 800I nozzles  
 Village  
 4 hr mortality  
 Outdoors **IN BOX**

USAF / USDA-ARS-CMAVE / NECE  
 DWFP COLLABORATIVE FIELD TRIAL  
 2013-10-29  
 CAMP BLANDING JOINT TRAINING CENTER, FL  
**VILLAGE**  
**NALED** AERIAL APPLICATION  
 AE. AEGYPTI TARGET  
 SIX PASSES UPWIND OF EACH VILLAGE  
 8001 TEEJET NOZZLES

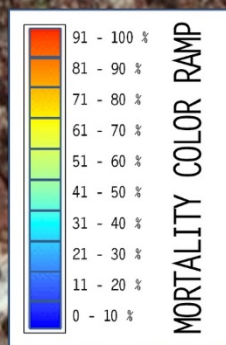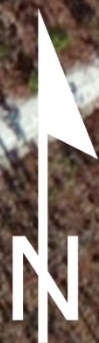

0 125 250 500 Feet

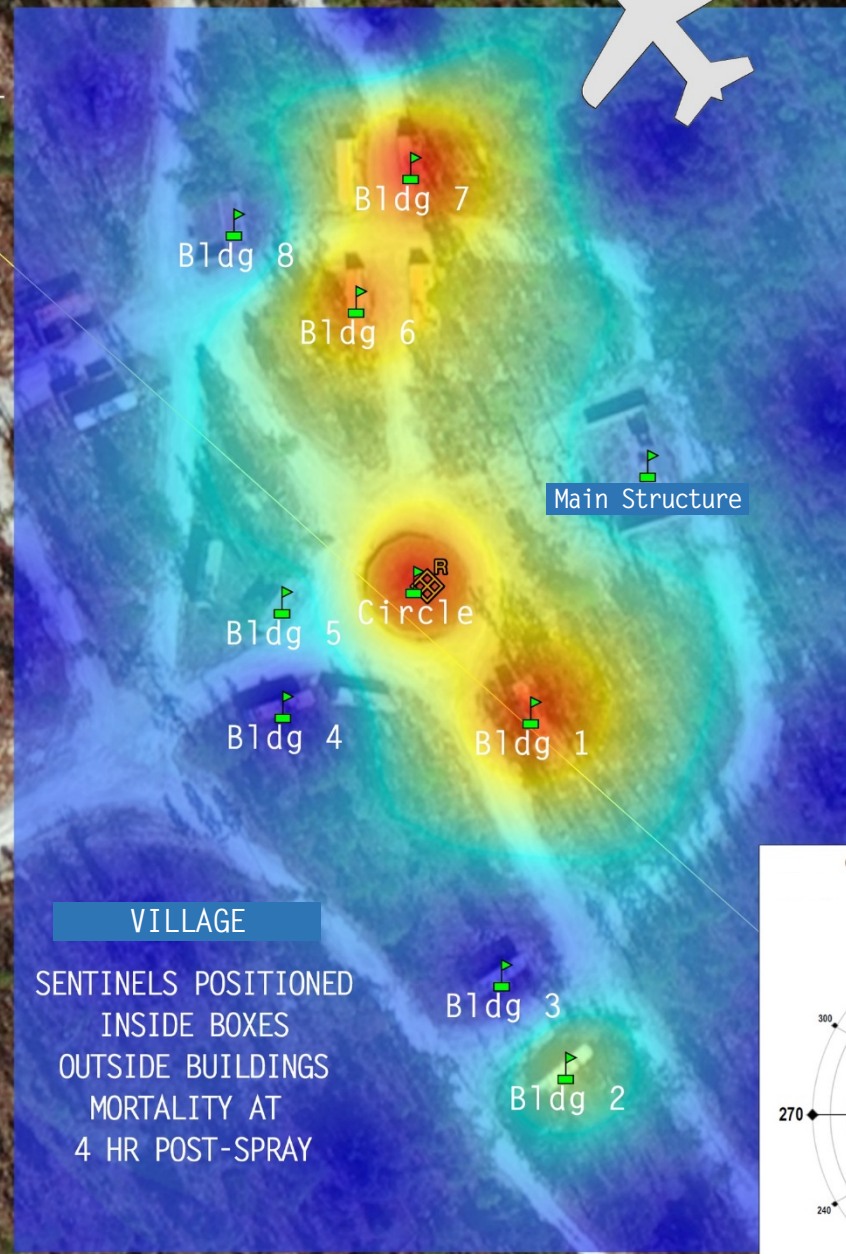

**VILLAGE**  
 SENTINELS POSITIONED  
 INSIDE BOXES  
 OUTSIDE BUILDINGS  
 MORTALITY AT  
 4 HR POST-SPRAY

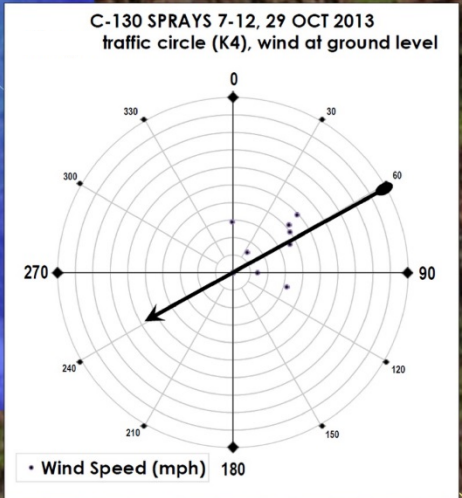

**Figure S27**  
 29 October 2013  
 800I nozzles  
 Village  
 12 hr mortality  
 Outdoors **IN BOX**

USAF / USDA-ARS-CMAVE / NECE  
 DWFP COLLABORATIVE FIELD TRIAL  
 2013-10-29  
 CAMP BLANDING JOINT TRAINING CENTER, FL  
**VILLAGE**  
**NALED** AERIAL APPLICATION  
 AE. AEGYPTI TARGET  
 SIX PASSES UPWIND OF EACH VILLAGE  
 8001 TEEJET NOZZLES

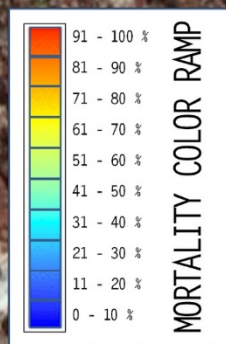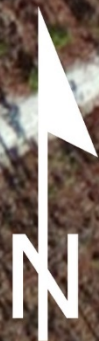

0 125 250 500 Feet

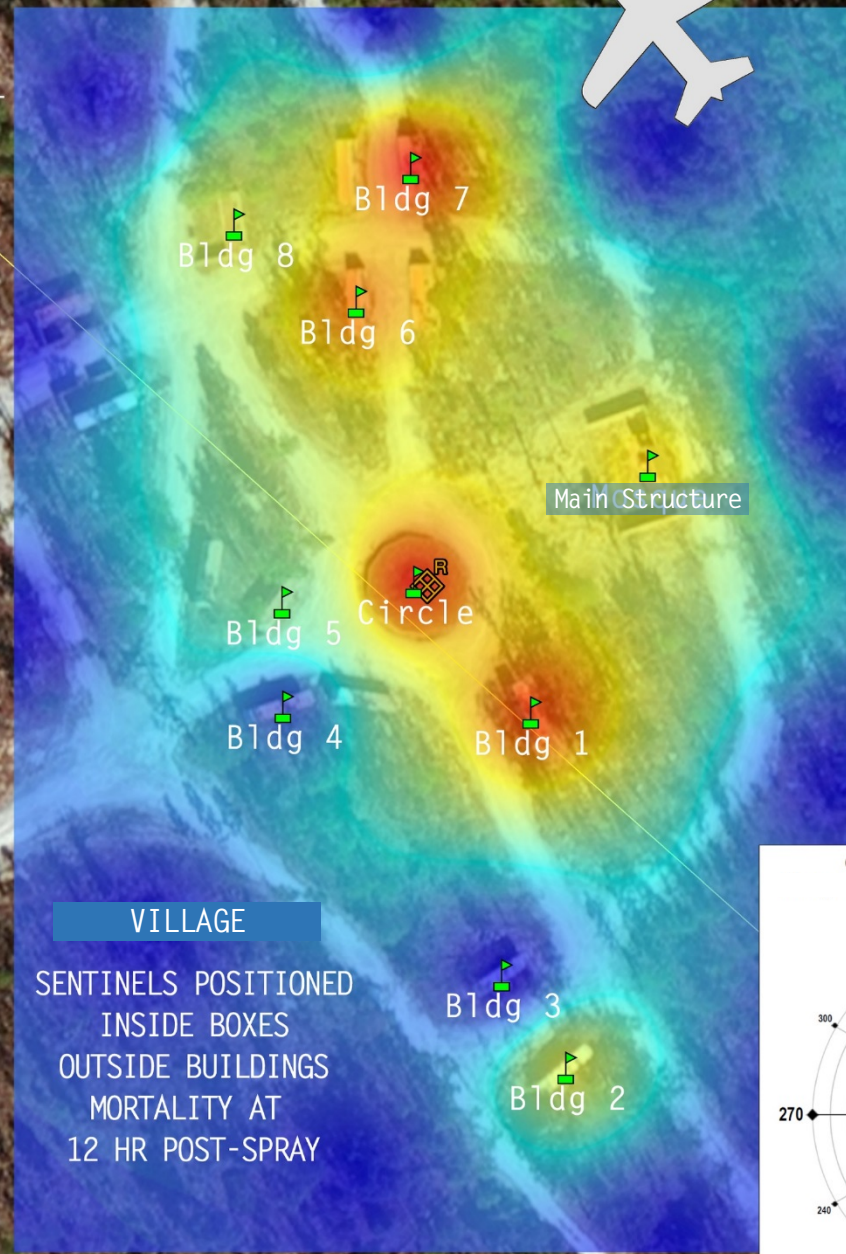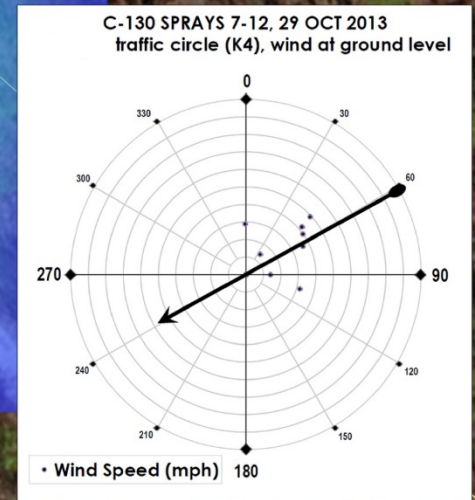

**Figure S28**  
 29 October 2013  
 800I nozzles  
 Village  
 1 hr mortality  
 Outdoors **ON POLE**

USAF / USDA-ARS-CMAVE / NECE  
 DWFP COLLABORATIVE FIELD TRIAL  
 2013-10-29  
 CAMP BLANDING JOINT TRAINING CENTER, FL  
**VILLAGE**  
**NALED** AERIAL APPLICATION  
 AE. AEGYPTI TARGET  
 SIX PASSES UPWIND OF EACH VILLAGE  
 8001 TEEJET NOZZLES

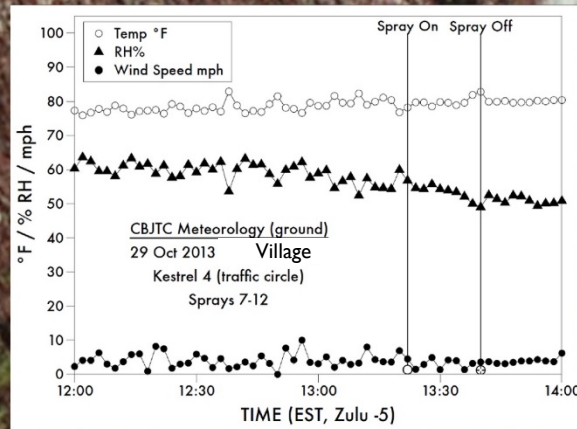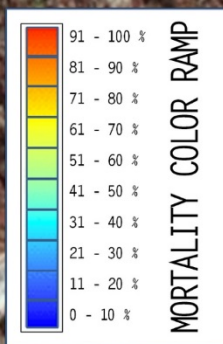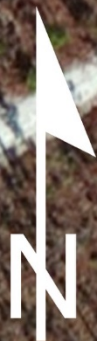

0 125 250 500 Feet

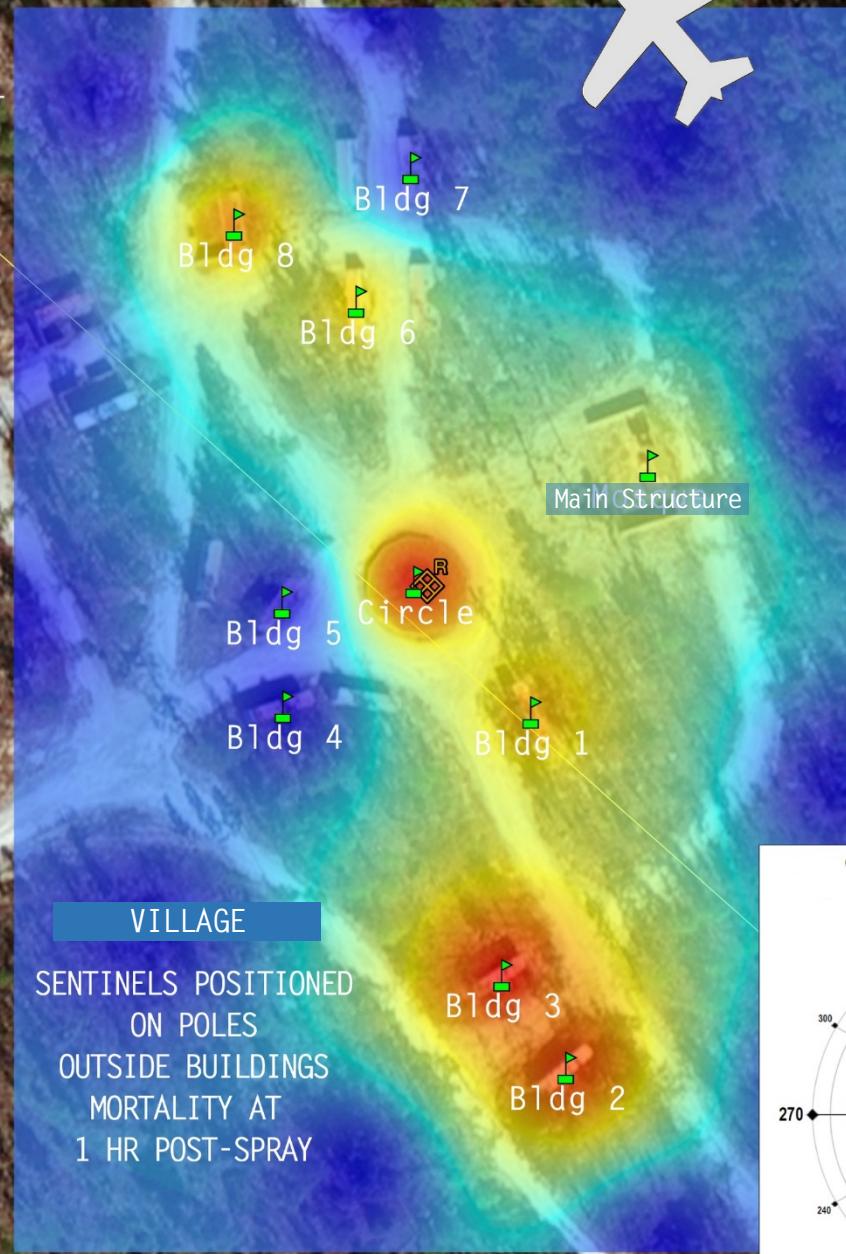

**VILLAGE**  
 SENTINELS POSITIONED  
 ON POLES  
 OUTSIDE BUILDINGS  
 MORTALITY AT  
 1 HR POST-SPRAY

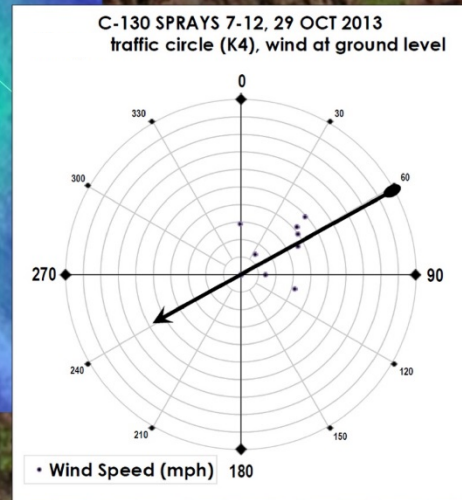

**Figure S29**  
 29 October 2013  
 800I nozzles  
 Village  
 4 hr mortality  
 Outdoors **ON POLE**

USAF / USDA-ARS-CMAVE / NECE  
 DWFP COLLABORATIVE FIELD TRIAL  
 2013-10-29  
 CAMP BLANDING JOINT TRAINING CENTER, FL  
**VILLAGE**  
**NALED** AERIAL APPLICATION  
 AE. AEGYPTI TARGET  
 SIX PASSES UPWIND OF EACH VILLAGE  
 8001 TEEJET NOZZLES

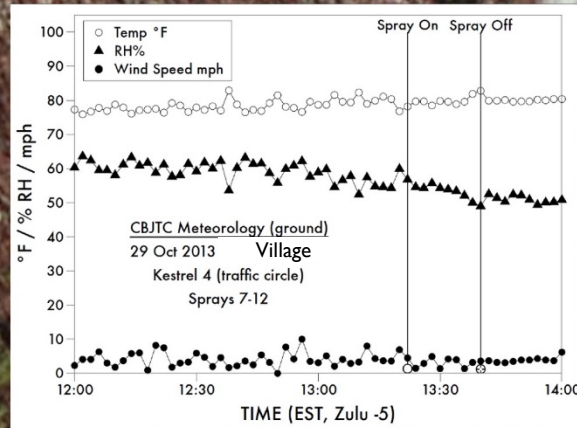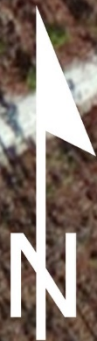

0 125 250 500 Feet

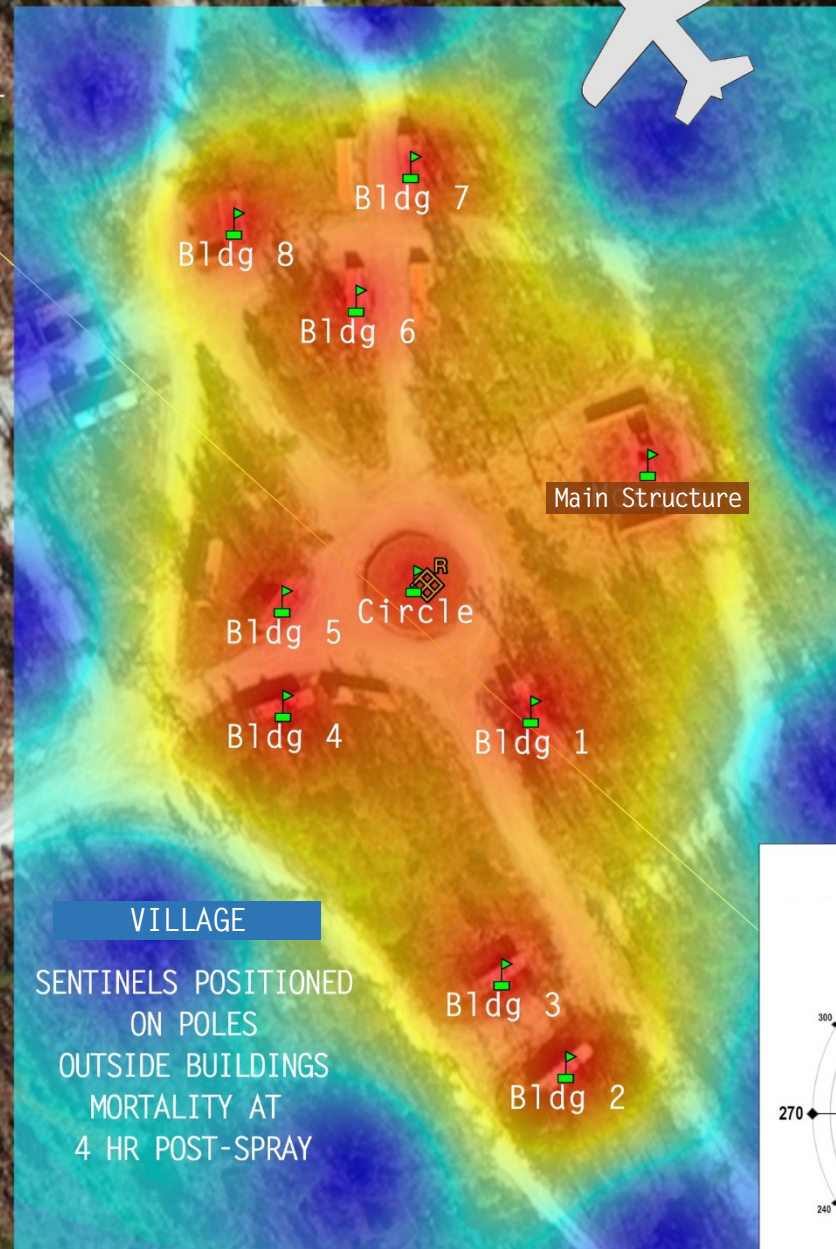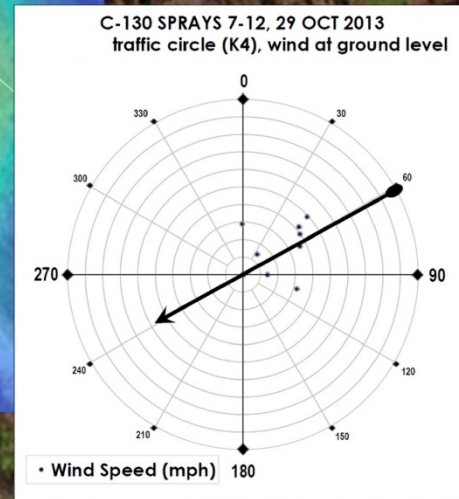



**Figure S30**  
 29 October 2013  
 800I nozzles  
 Village  
 12 hr mortality  
 Outdoors **ON POLE**

USAF / USDA-ARS-CMAVE / NECE  
 DWFP COLLABORATIVE FIELD TRIAL  
 2013-10-29  
 CAMP BLANDING JOINT TRAINING CENTER, FL  
**VILLAGE**  
**NALED** AERIAL APPLICATION  
 AE. AEGYPTI TARGET  
 SIX PASSES UPWIND OF EACH VILLAGE  
 8001 TEEJET NOZZLES

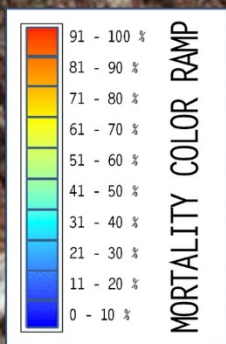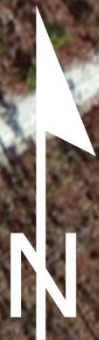

0 125 250 500 Feet

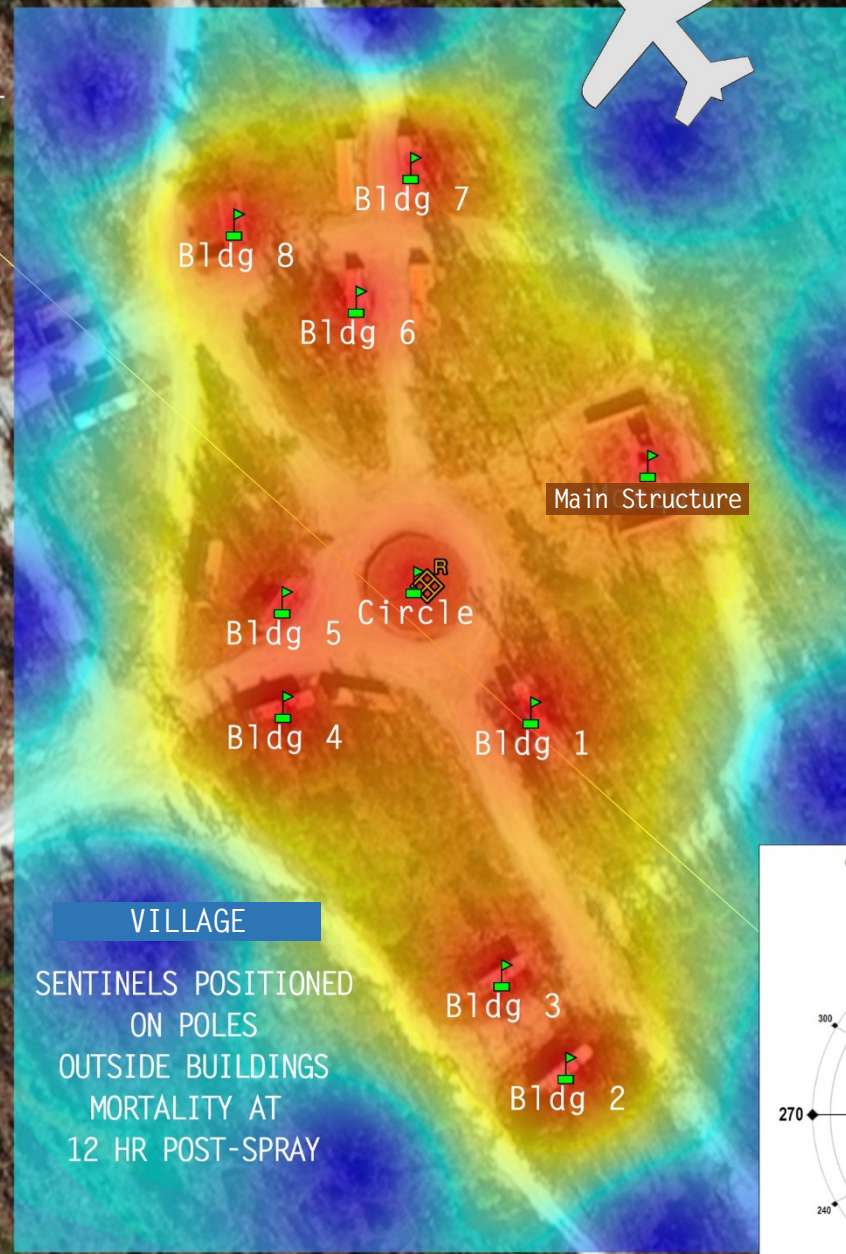

**VILLAGE**  
 SENTINELS POSITIONED  
 ON POLES  
 OUTSIDE BUILDINGS  
 MORTALITY AT  
 12 HR POST-SPRAY

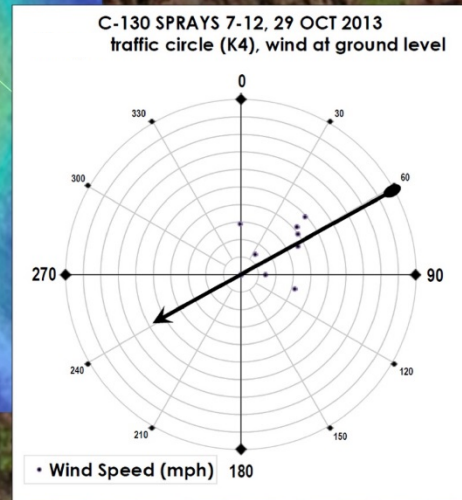

**Figure S3I**  
 29 October 2013  
 800I nozzles  
 Village  
 1 hr mortality  
 Indoors **IN BOX**

USAF / USDA-ARS-CMAVE / NECE  
 DWFP COLLABORATIVE FIELD TRIAL  
 2013-10-29  
 CAMP BLANDING JOINT TRAINING CENTER, FL  
**VILLAGE**  
**NALED** AERIAL APPLICATION  
 AE. AEGYPTI TARGET  
 SIX PASSES UPWIND OF EACH VILLAGE  
 8001 TEEJET NOZZLES

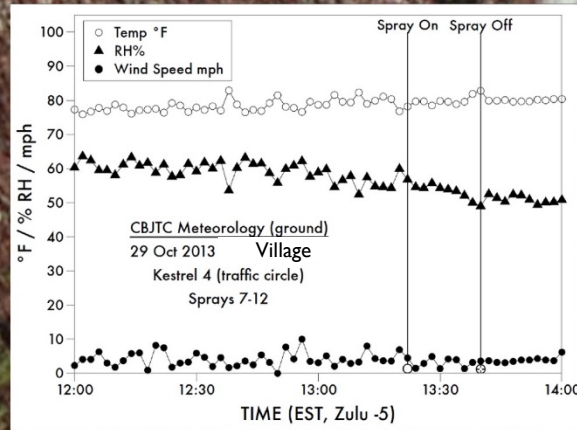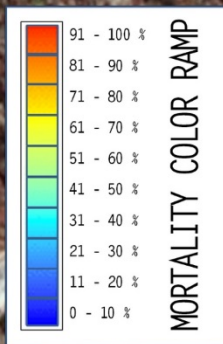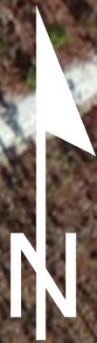

0 125 250 500 Feet

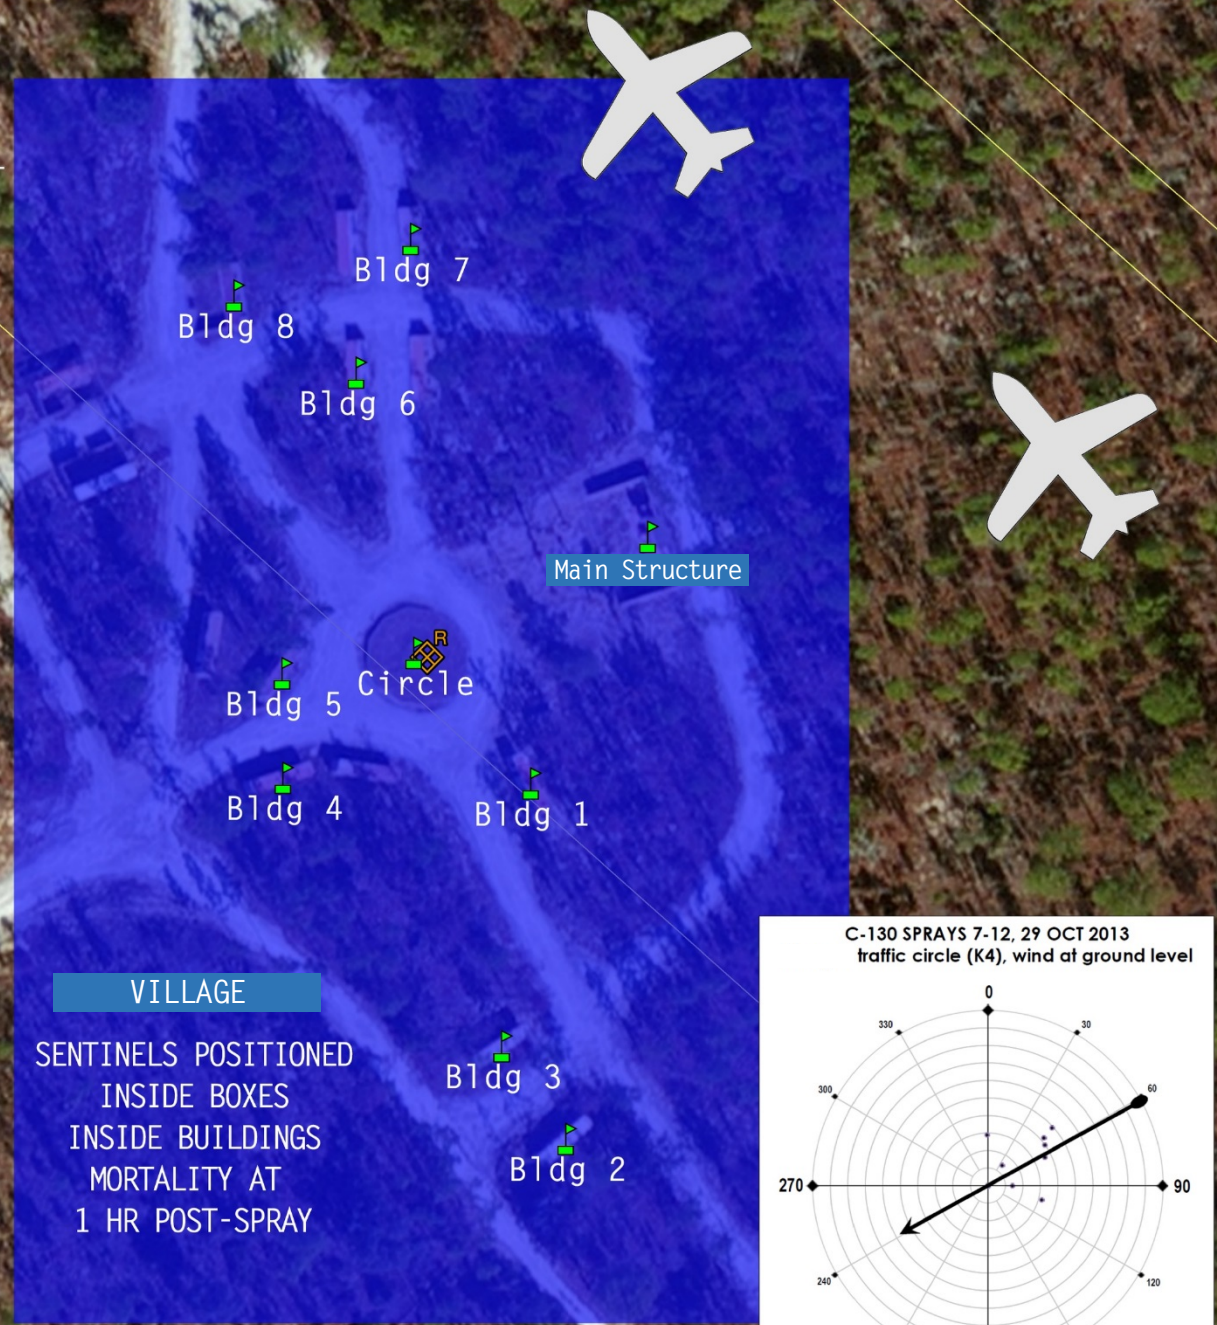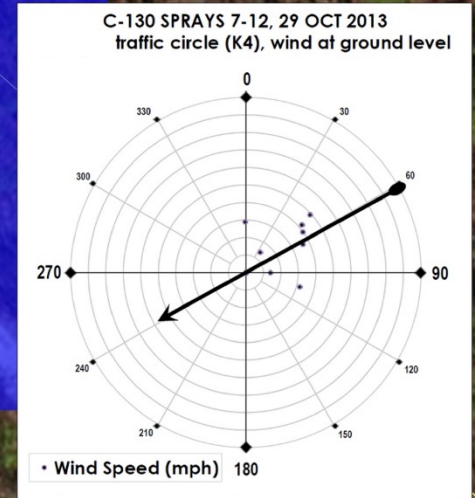

**Figure S32**  
 29 October 2013  
 800I nozzles  
 Village  
 4 hr mortality  
 Indoors **IN BOX**

USAF / USDA-ARS-CMAVE / NECE  
 DWFP COLLABORATIVE FIELD TRIAL  
 2013-10-29  
 CAMP BLANDING JOINT TRAINING CENTER, FL  
**VILLAGE**  
**NALED** AERIAL APPLICATION  
 AE. AEGYPTI TARGET  
 SIX PASSES UPWIND OF EACH VILLAGE  
 8001 TEEJET NOZZLES

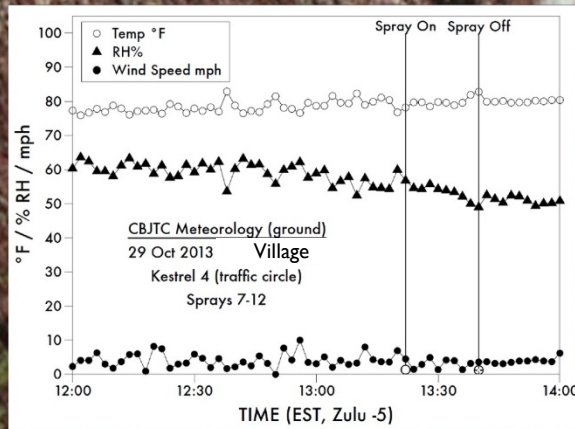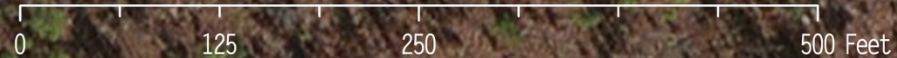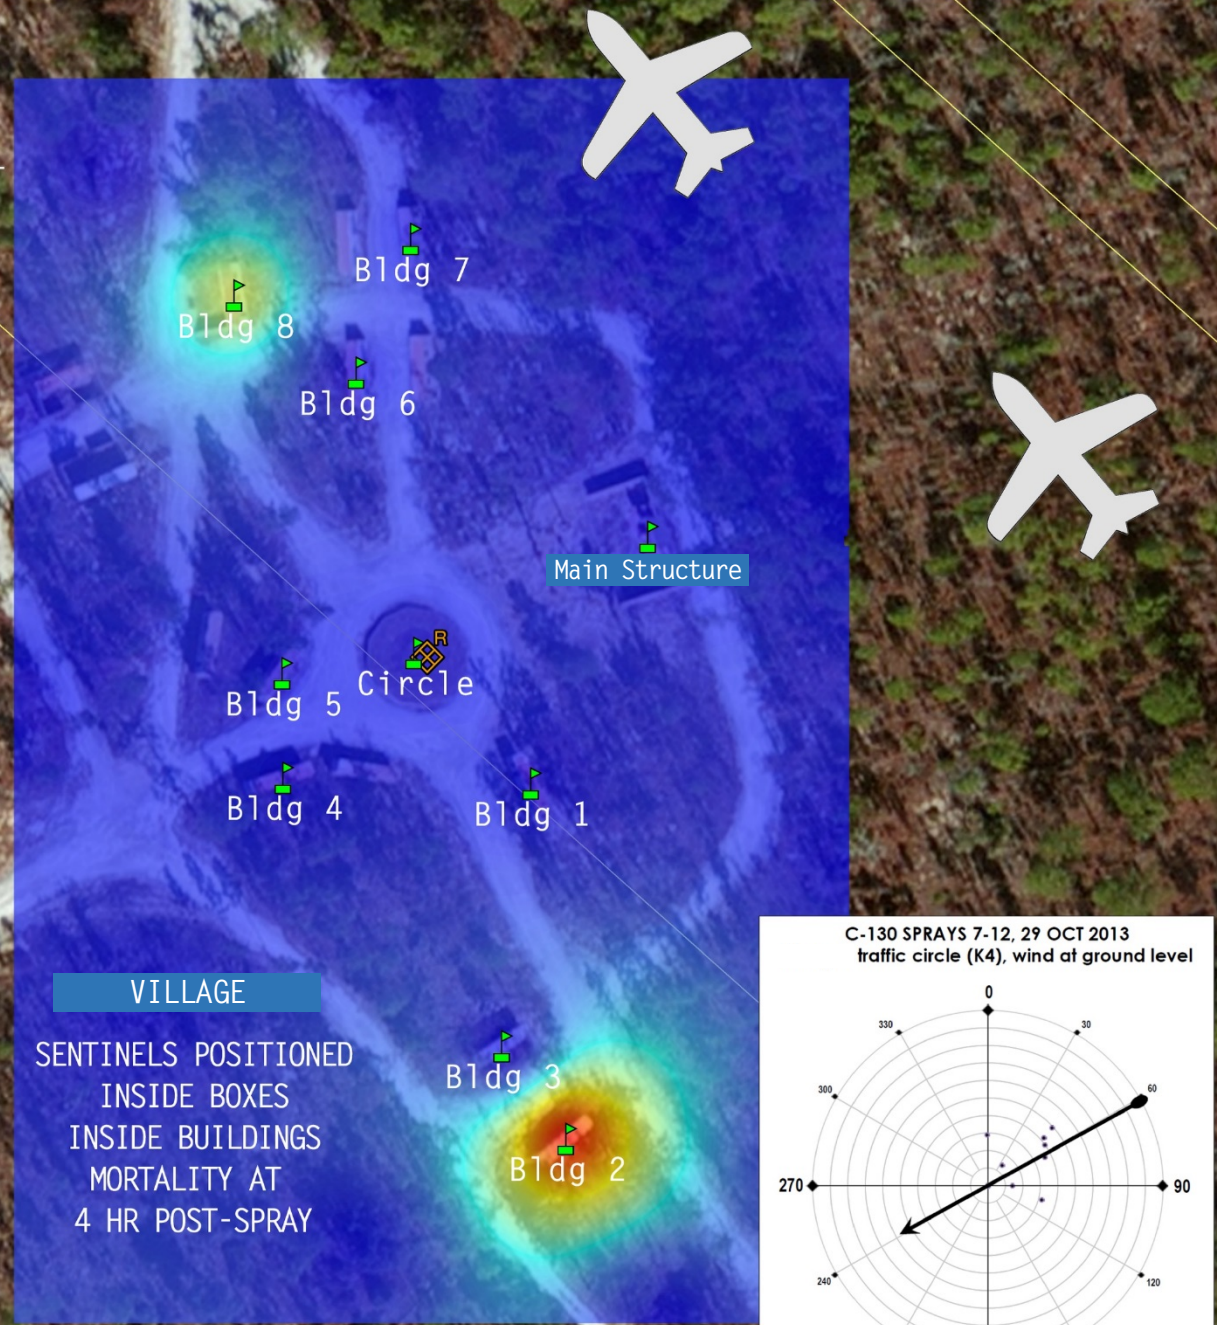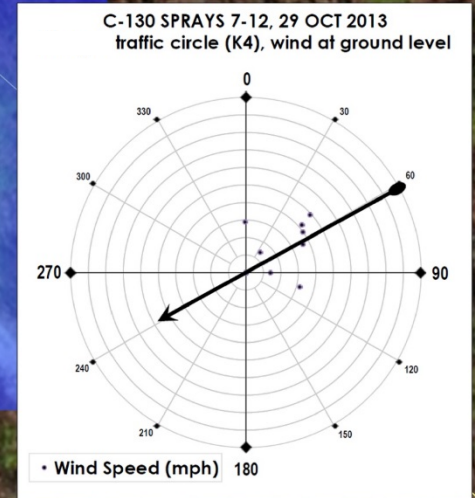

**Figure S33**  
 29 October 2013  
 800I nozzles  
 Village  
 12 hr mortality  
 Indoors **IN BOX**

USAF / USDA-ARS-CMAVE / NECE  
 DWFP COLLABORATIVE FIELD TRIAL  
 2013-10-29  
 CAMP BLANDING JOINT TRAINING CENTER, FL  
**VILLAGE**  
**NALED** AERIAL APPLICATION  
 AE. AEGYPTI TARGET  
 SIX PASSES UPWIND OF EACH VILLAGE  
 8001 TEEJET NOZZLES



0 125 250 500 Feet

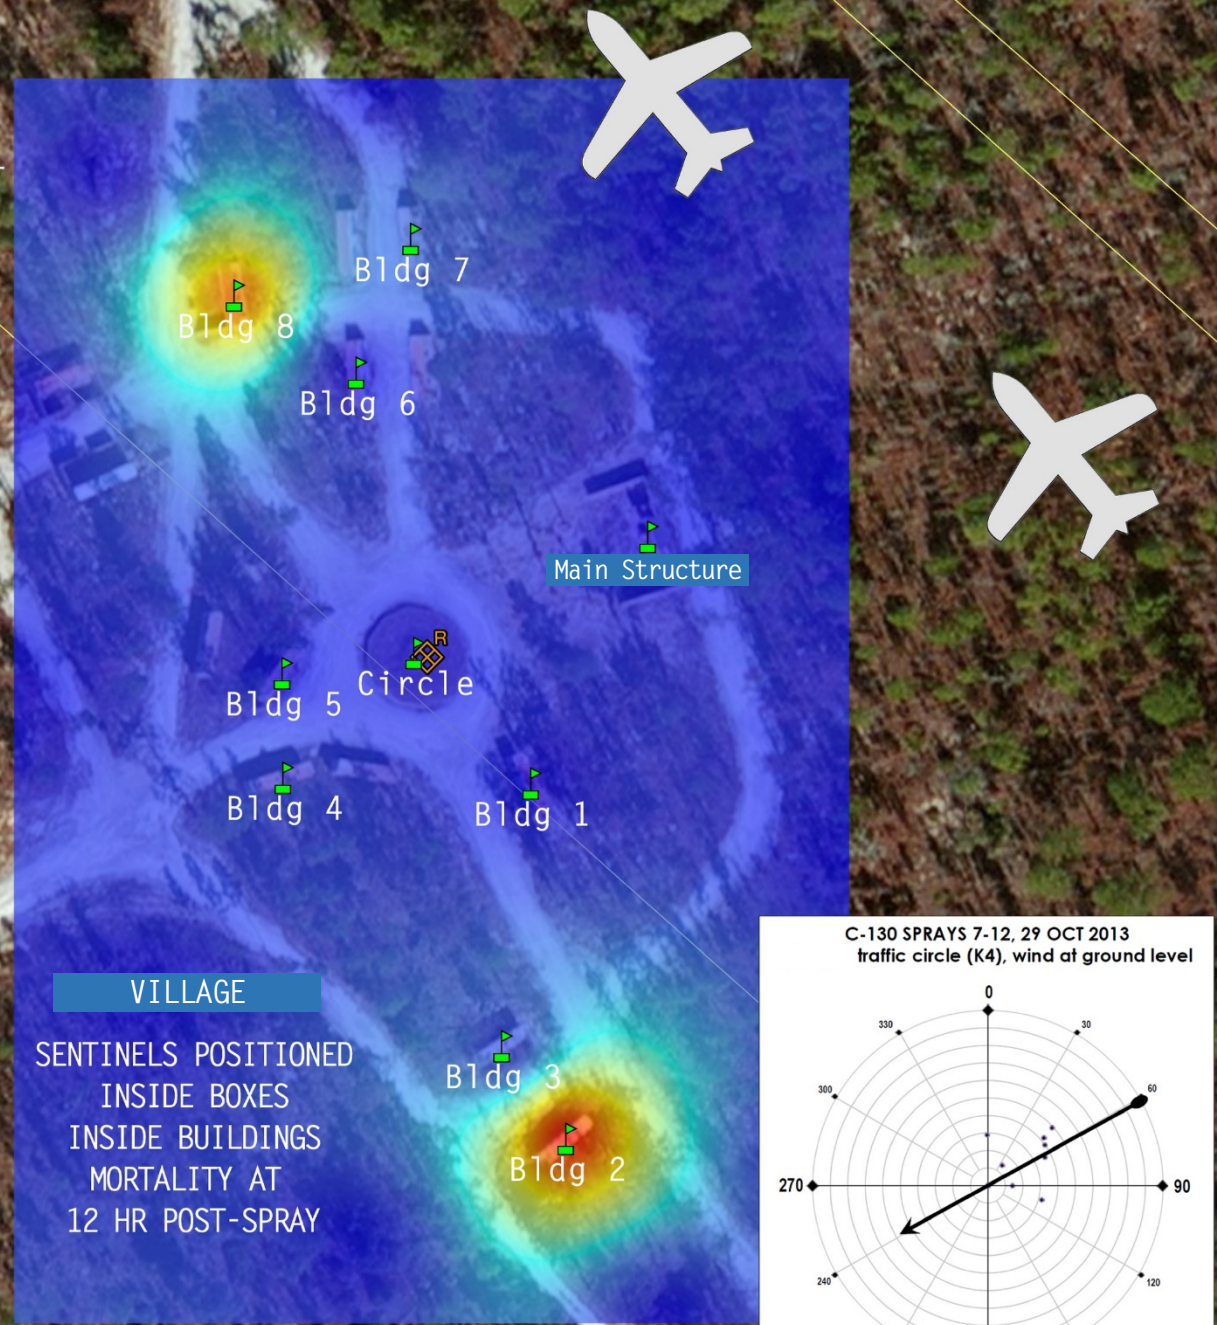

**VILLAGE**  
 SENTINELS POSITIONED  
 INSIDE BOXES  
 INSIDE BUILDINGS  
 MORTALITY AT  
 12 HR POST-SPRAY

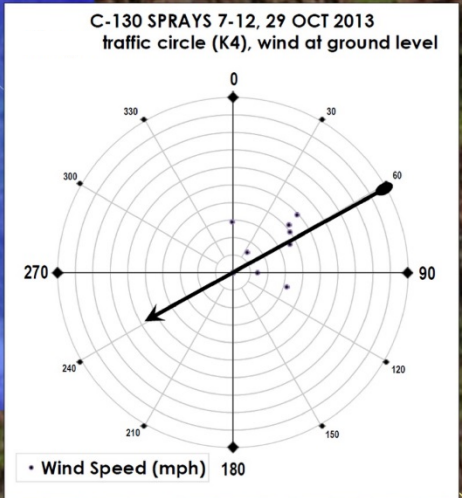

**Figure S34**  
 29 October 2013  
 800I nozzles  
 Village  
 1 hr mortality  
 Indoors **ON FLOOR**

USAF / USDA-ARS-CMAVE / NECE  
 DWFP COLLABORATIVE FIELD TRIAL  
 2013-10-29  
 CAMP BLANDING JOINT TRAINING CENTER, FL  
**VILLAGE**

**NALED** AERIAL APPLICATION  
 AE. AEGYPTI TARGET

SIX PASSES UPWIND OF EACH VILLAGE  
 8001 TEEJET NOZZLES

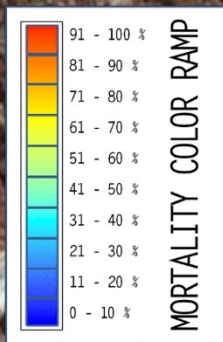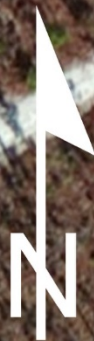

0 125 250 500 Feet

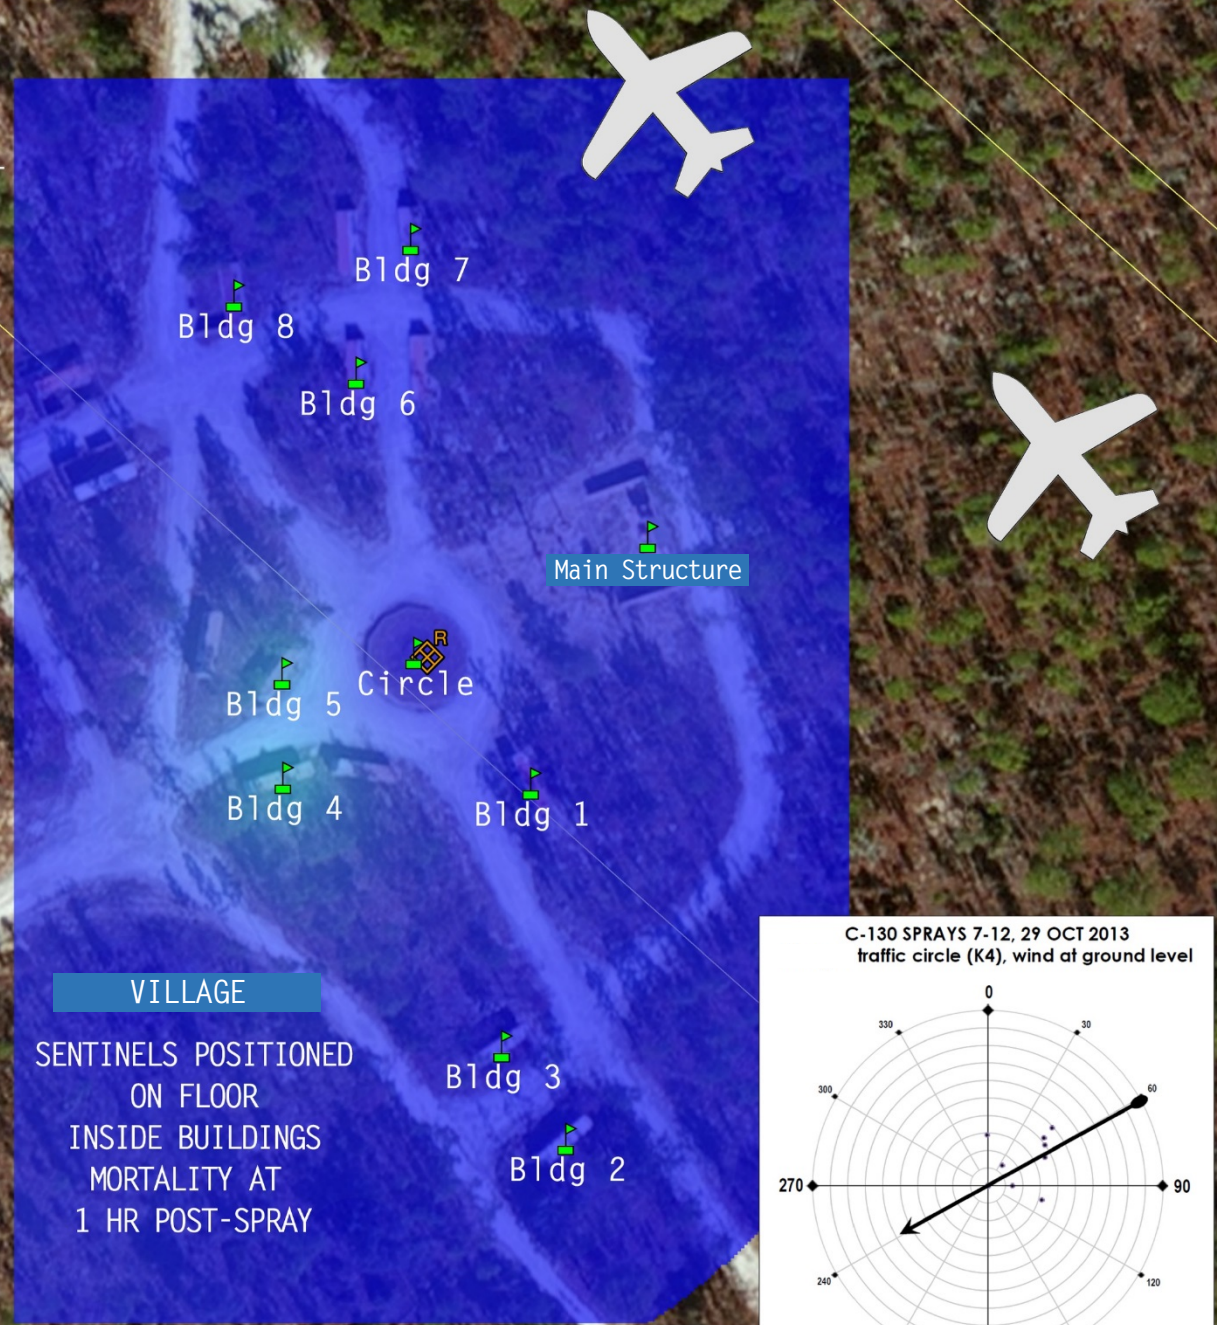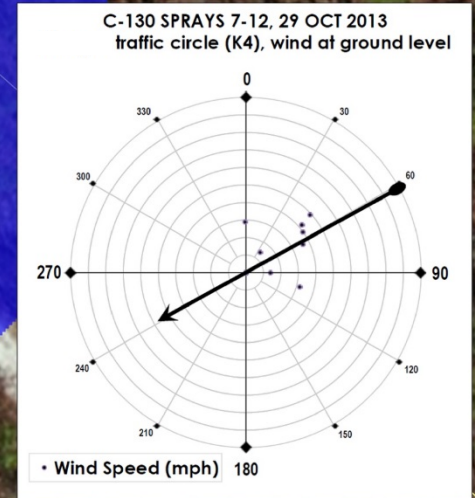

**Figure S35**  
 29 October 2013  
 800I nozzles  
 Village  
 4 hr mortality  
 Indoors **ON FLOOR**

USAF / USDA-ARS-CMAVE / NECE  
 DWFP COLLABORATIVE FIELD TRIAL  
 2013-10-29  
 CAMP BLANDING JOINT TRAINING CENTER, FL  
**VILLAGE**  
**NALED** AERIAL APPLICATION  
 AE. AEGYPTI TARGET  
 SIX PASSES UPWIND OF EACH VILLAGE  
 8001 TEEJET NOZZLES



0 125 250 500 Feet

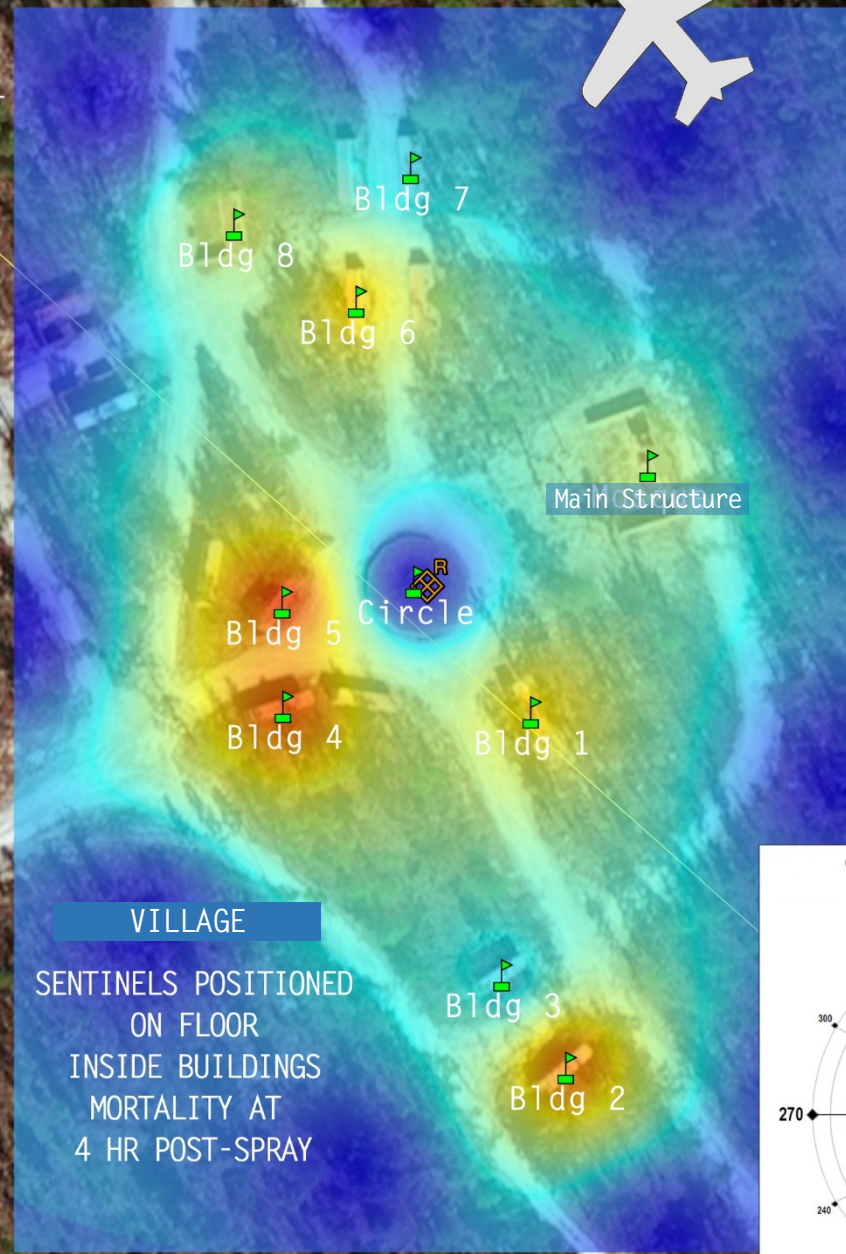

**VILLAGE**  
 SENTINELS POSITIONED  
 ON FLOOR  
 INSIDE BUILDINGS  
 MORTALITY AT  
 4 HR POST-SPRAY

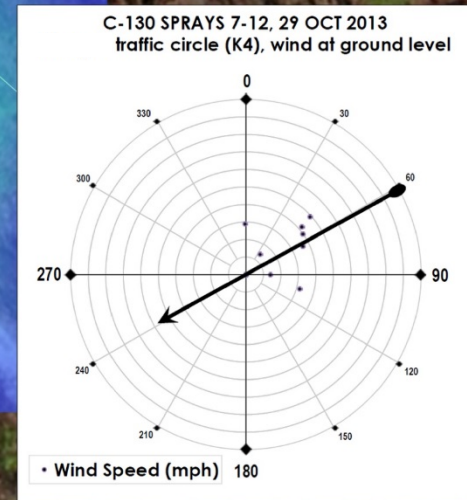

**Figure S36**  
 29 October 2013  
 800I nozzles  
 Village  
 12 hr mortality  
 Indoors **ON FLOOR**

USAF / USDA-ARS-CMAVE / NECE  
 DWFP COLLABORATIVE FIELD TRIAL  
 2013-10-29  
 CAMP BLANDING JOINT TRAINING CENTER, FL  
**VILLAGE**  
**NALED** AERIAL APPLICATION  
 AE. AEGYPTI TARGET  
 SIX PASSES UPWIND OF EACH VILLAGE  
 8001 TEEJET NOZZLES

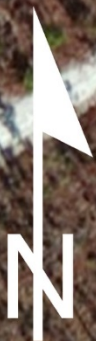

0 125 250 500 Feet

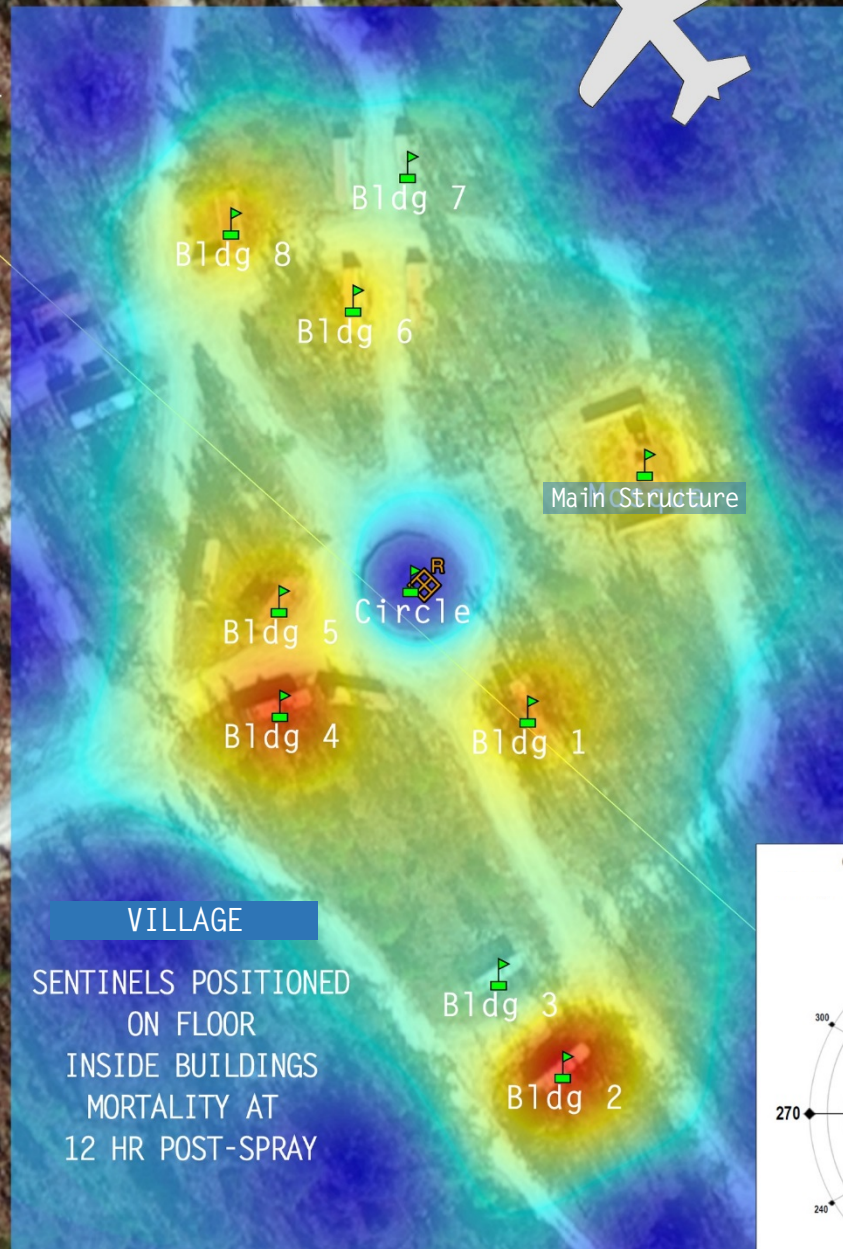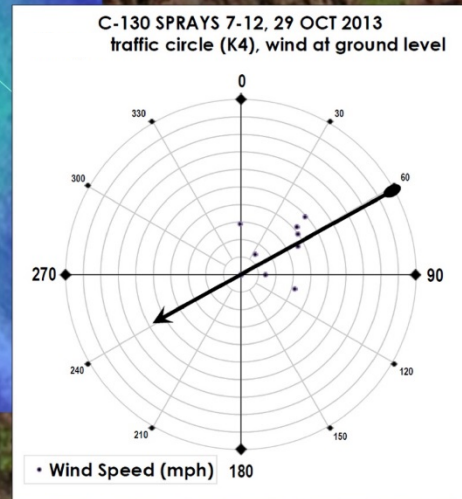

**SET D**

S37–S48 Figs. Naled efficacy (mortality), Village 30 Oct.



**Figure S37**  
 30 October 2013  
 8003 nozzles  
 Village  
 1 hr mortality  
 Outdoors **IN BOX**

USAF / USDA-ARS-CMAVE / NECE  
 DWFP COLLABORATIVE FIELD TRIAL  
 2013-10-30  
 CAMP BLANDING JOINT TRAINING CENTER, FL  
**VILLAGE**  
**NALED** AERIAL APPLICATION  
 AE. AEGYPTI TARGET  
 SIX PASSES UPWIND OF EACH VILLAGE  
 8003 TEEJET NOZZLES

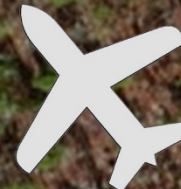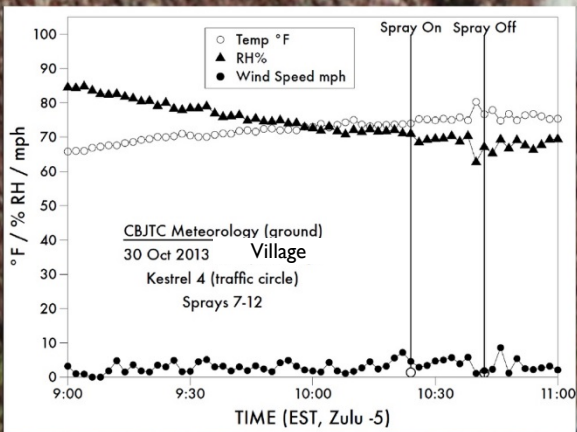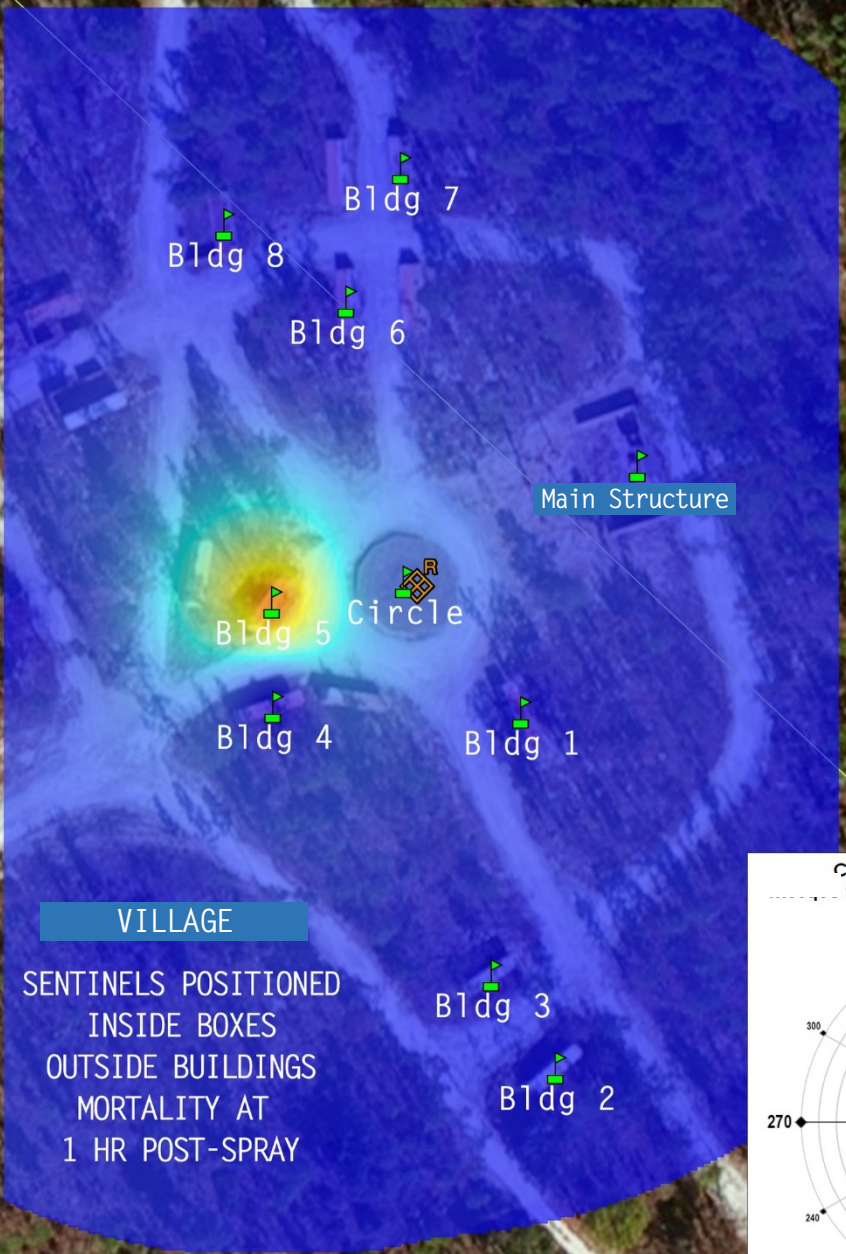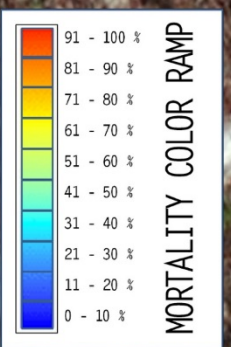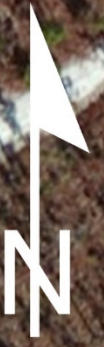

0 125 250 500 Feet

**VILLAGE**  
 SENTINELS POSITIONED  
 INSIDE BOXES  
 OUTSIDE BUILDINGS  
 MORTALITY AT  
 1 HR POST-SPRAY

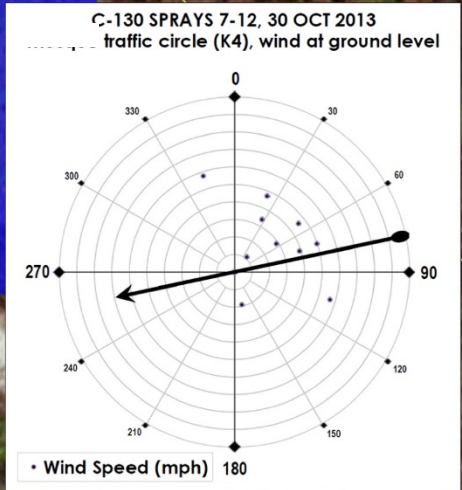

**Figure S38**  
 30 October 2013  
 8003 nozzles  
 Village  
 4 hr mortality  
 Outdoors **IN BOX**

USAF / USDA-ARS-CMAVE / NECE  
 DWFP COLLABORATIVE FIELD TRIAL  
 2013-10-30  
 CAMP BLANDING JOINT TRAINING CENTER, FL  
**VILLAGE**  
**NALED** AERIAL APPLICATION  
 AE. AEGYPTI TARGET  
 SIX PASSES UPWIND OF EACH VILLAGE  
 8003 TEEJET NOZZLES

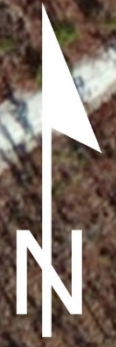

0 125 250 500 Feet

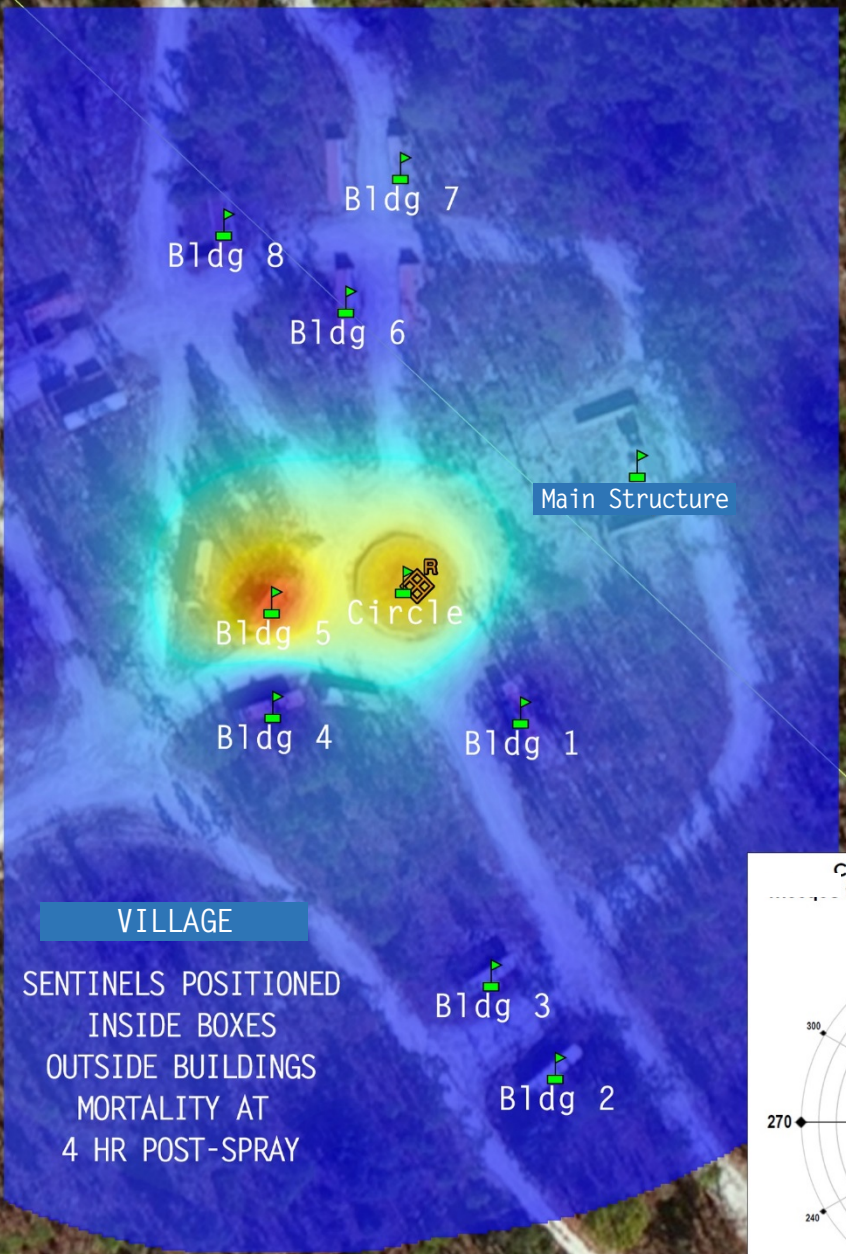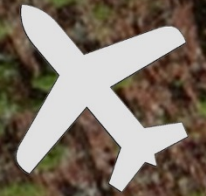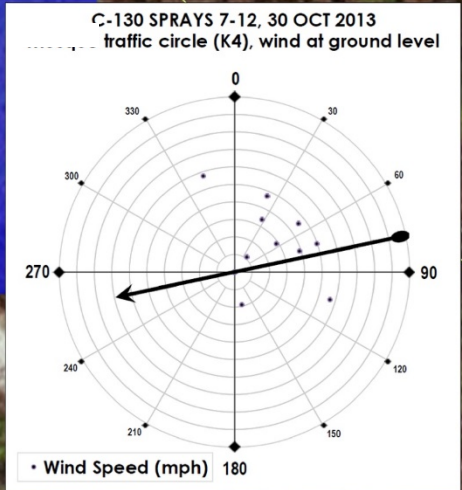

**Figure S39**  
 30 October 2013  
 8003 nozzles  
 Village  
 12 hr mortality  
 Outdoors **IN BOX**

USAF / USDA-ARS-CMAVE / NECE  
 DWFP COLLABORATIVE FIELD TRIAL  
 2013-10-30  
 CAMP BLANDING JOINT TRAINING CENTER, FL  
**VILLAGE**  
**NALED** AERIAL APPLICATION  
 AE. AEGYPTI TARGET  
 SIX PASSES UPWIND OF EACH VILLAGE  
 8003 TEEJET NOZZLES

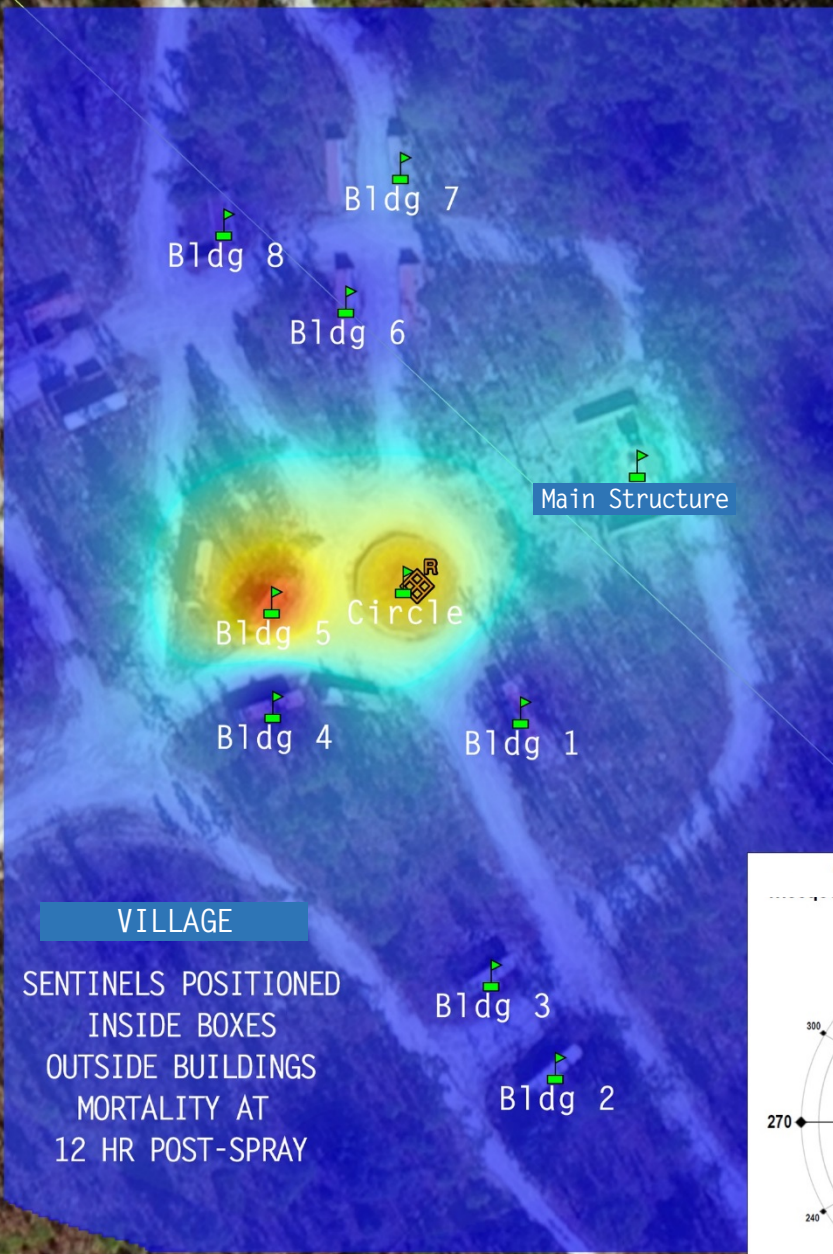

**VILLAGE**  
 SENTINELS POSITIONED  
 INSIDE BOXES  
 OUTSIDE BUILDINGS  
 MORTALITY AT  
 12 HR POST-SPRAY

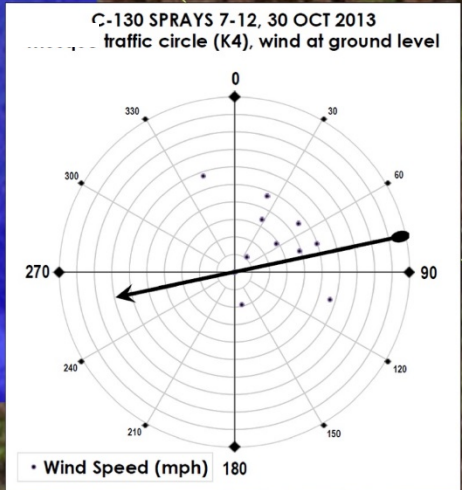

**Figure S40**  
 30 October 2013  
 8003 nozzles  
 Village  
 1 hr mortality  
 Outdoors **ON POLE**

USAF / USDA-ARS-CMAVE / NECE  
 DWFP COLLABORATIVE FIELD TRIAL  
 2013-10-30  
 CAMP BLANDING JOINT TRAINING CENTER, FL  
**VILLAGE**  
**NALED** AERIAL APPLICATION  
 AE. AEGYPTI TARGET  
 SIX PASSES UPWIND OF EACH VILLAGE  
 8003 TEEJET NOZZLES

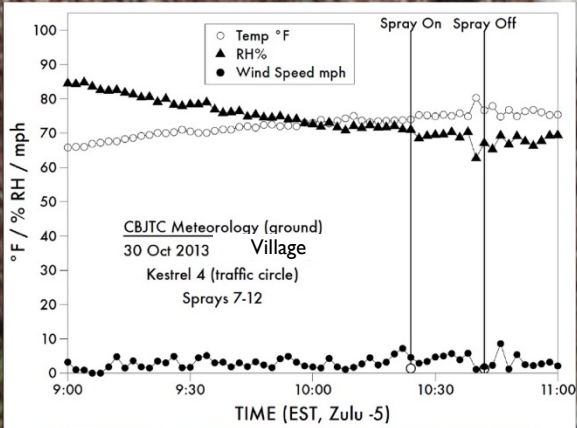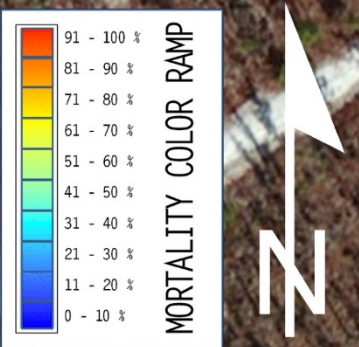

0 125 250 500 Feet

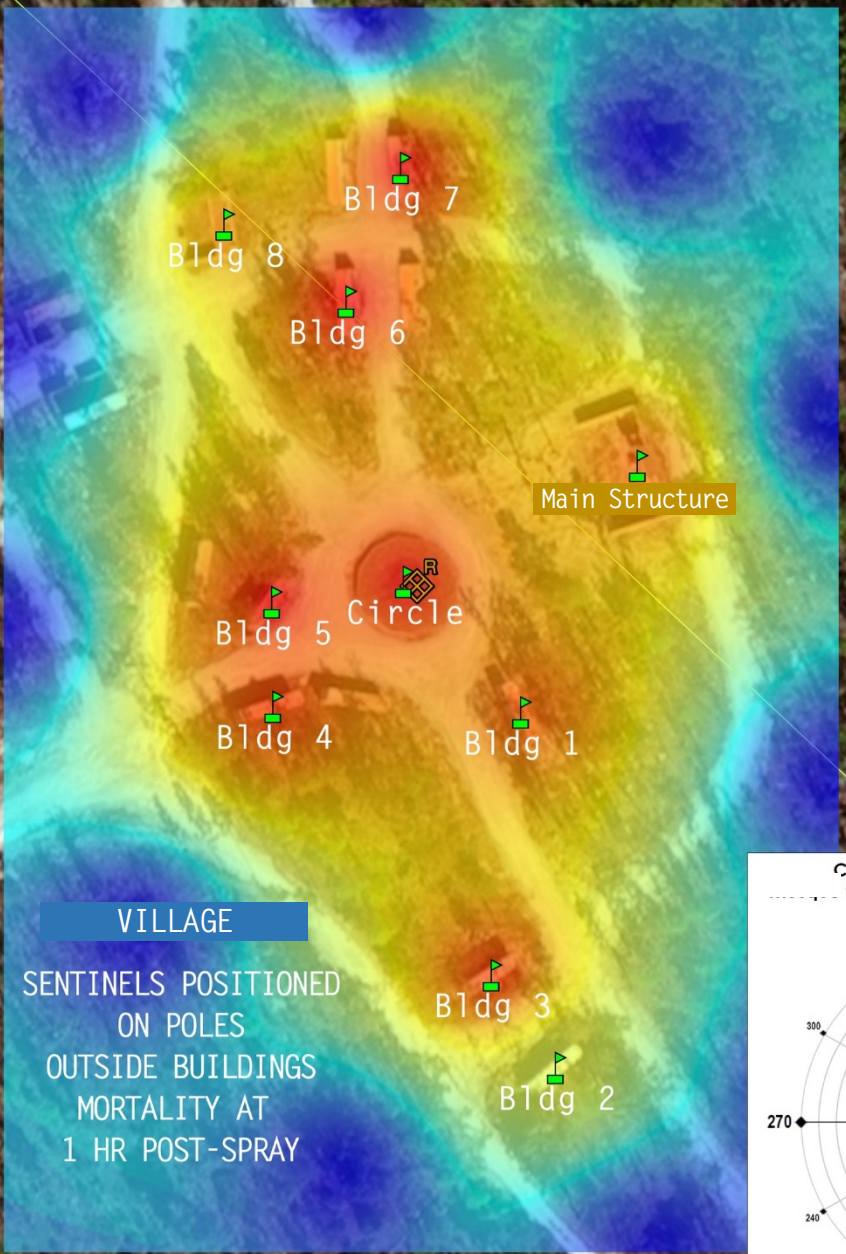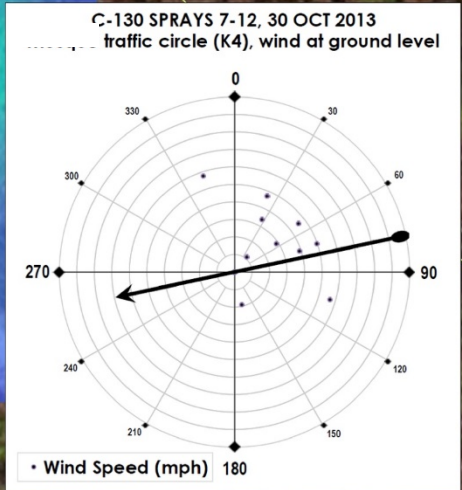

**Figure S4I**  
 30 October 2013  
 8003 nozzles  
 Village  
 4 hr mortality  
 Outdoors **ON POLE**

USAF / USDA-ARS-CMAVE / NECE  
 DWFP COLLABORATIVE FIELD TRIAL  
 2013-10-30  
 CAMP BLANDING JOINT TRAINING CENTER, FL

2013-10-30

CAMP BLANDING JOINT TRAINING CENTER, FL

VILLAGE

NALED AERIAL APPLICATION

AE. AEGYPTI TARGET

SIX PASSES UPWIND OF EACH VILLAGE

8003 TEEJET NOZZLES

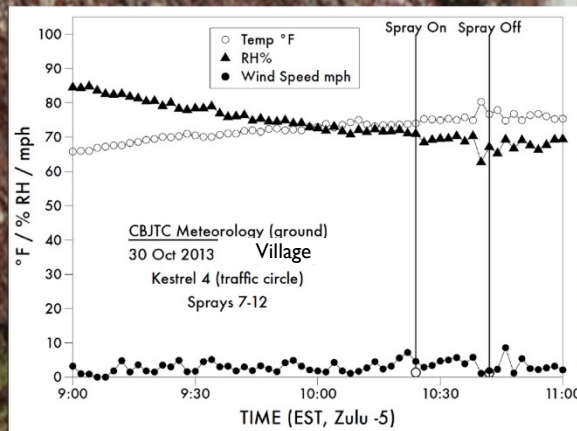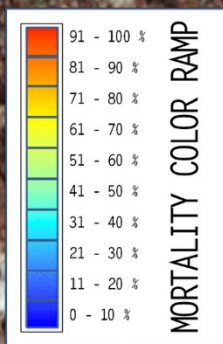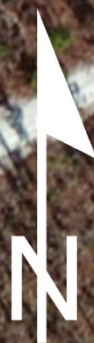

0 125 250 500 Feet

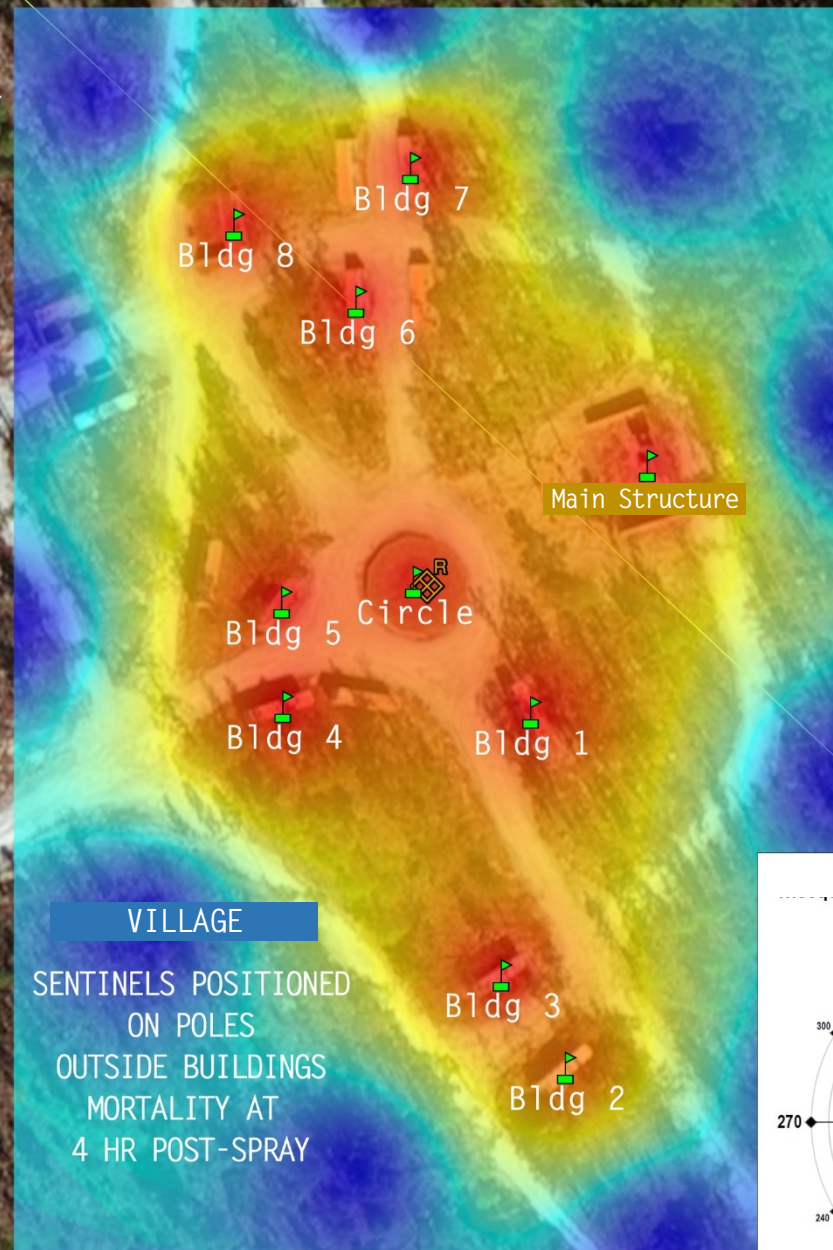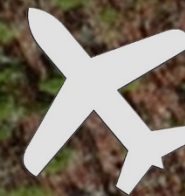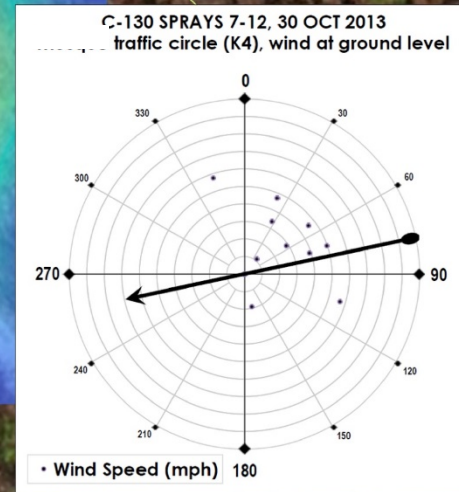

**Figure S42**  
 30 October 2013  
 8003 nozzles  
 Village  
 12 hr mortality  
 Outdoors **ON POLE**

USAF / USDA-ARS-CMAVE / NECE  
 DWFP COLLABORATIVE FIELD TRIAL  
 2013-10-30  
 CAMP BLANDING JOINT TRAINING CENTER, FL  
**VILLAGE**  
**NALED** AERIAL APPLICATION  
 AE. AEGYPTI TARGET  
 SIX PASSES UPWIND OF EACH VILLAGE  
 8003 TEEJET NOZZLES

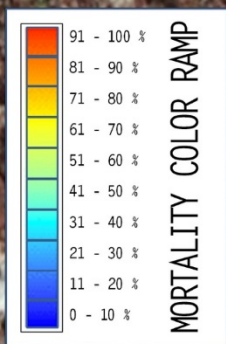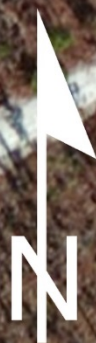

0 125 250 500 Feet

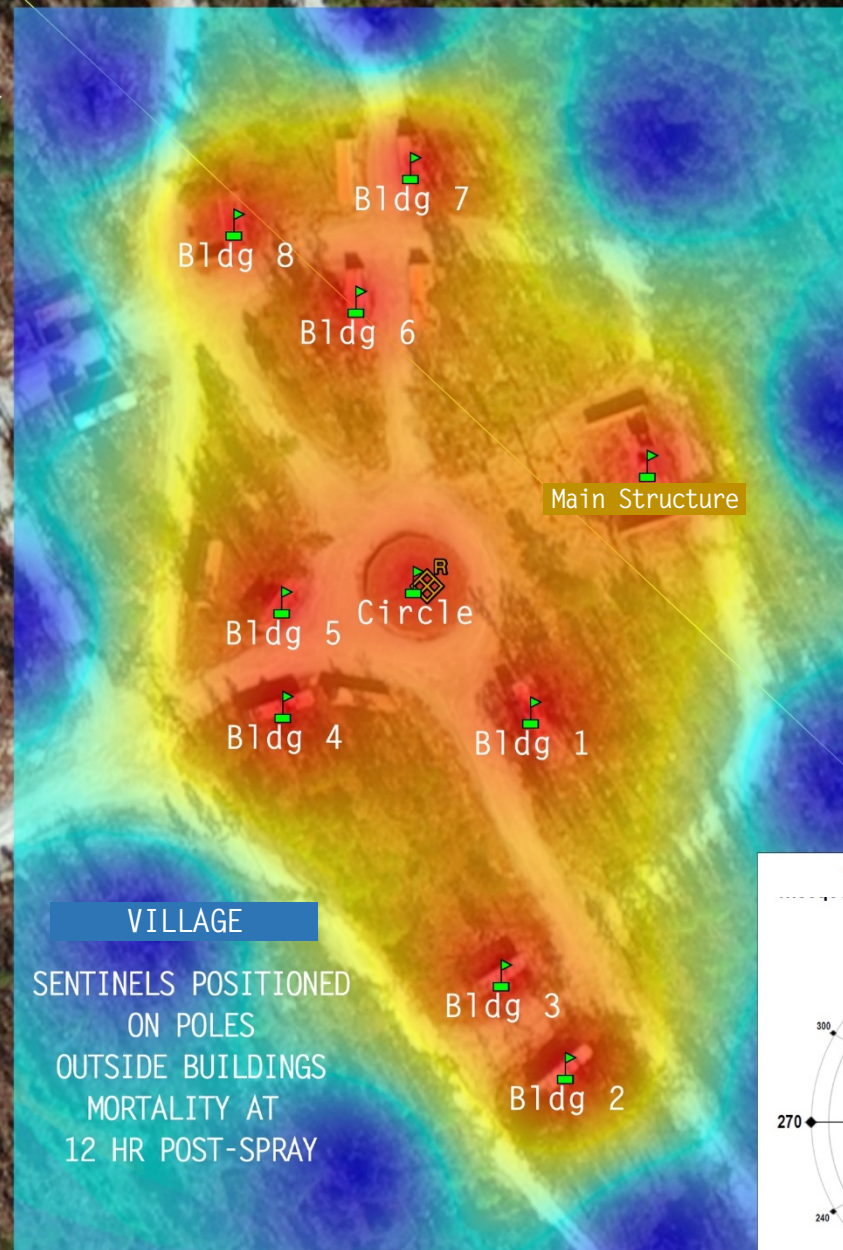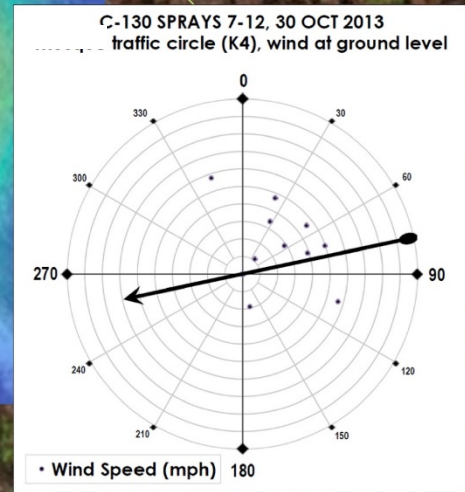

**Figure S43**  
 30 October 2013  
 8003 nozzles  
 Village  
 1 hr mortality  
 Indoors **IN BOX**

USAF / USDA-ARS-CMAVE / NECE  
 DWFP COLLABORATIVE FIELD TRIAL  
 2013-10-30  
 CAMP BLANDING JOINT TRAINING CENTER, FL  
**VILLAGE**  
**NALED** AERIAL APPLICATION  
 AE. AEGYPTI TARGET  
 SIX PASSES UPWIND OF EACH VILLAGE  
 8003 TEEJET NOZZLES

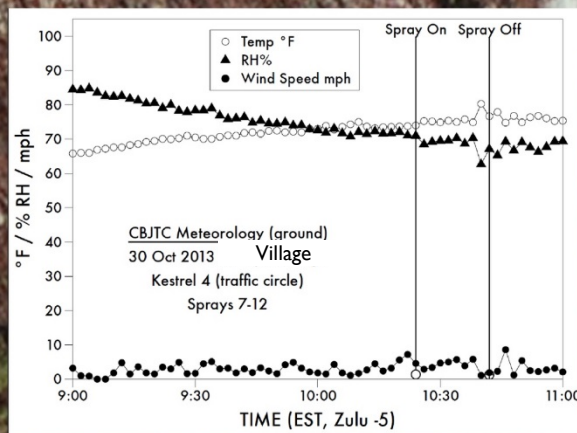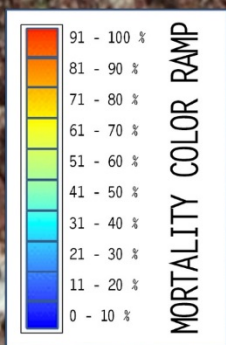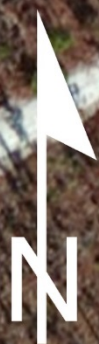

0 125 250 500 Feet

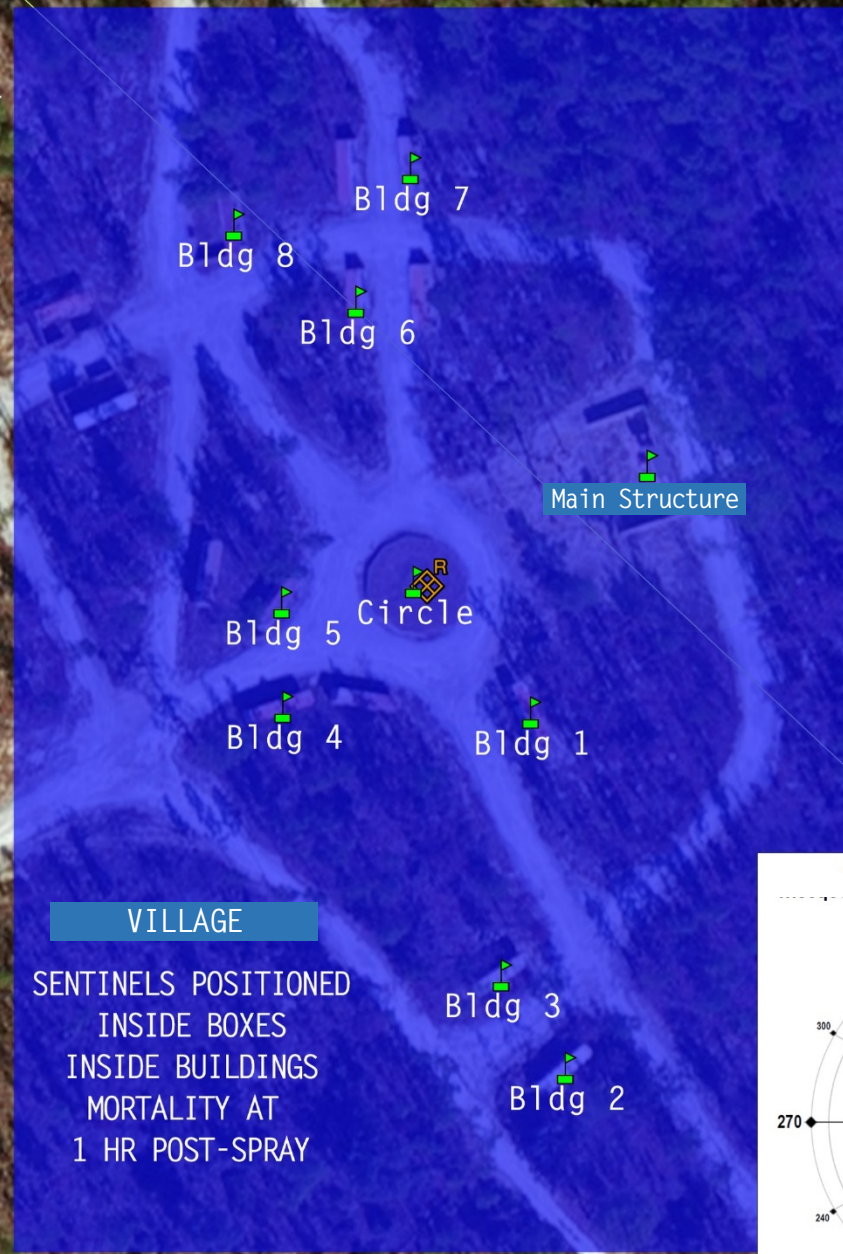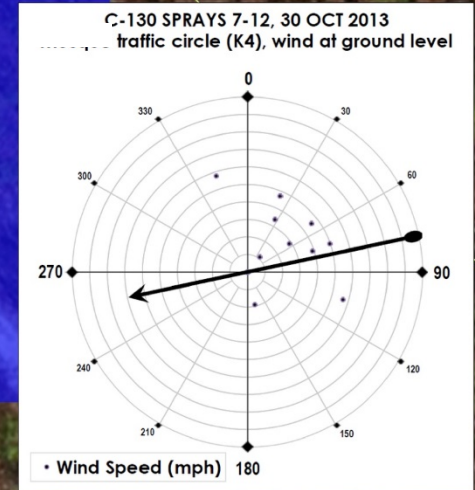

**Figure S44**  
 30 October 2013  
 8003 nozzles  
 Village  
 4 hr mortality  
 Indoors **IN BOX**

USAF / USDA-ARS-CMAVE / NECE  
 DWFP COLLABORATIVE FIELD TRIAL  
 2013-10-30  
 CAMP BLANDING JOINT TRAINING CENTER, FL  
**VILLAGE**  
**NALED** AERIAL APPLICATION  
 AE. AEGYPTI TARGET  
 SIX PASSES UPWIND OF EACH VILLAGE  
 8003 TEEJET NOZZLES

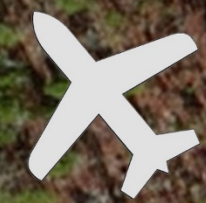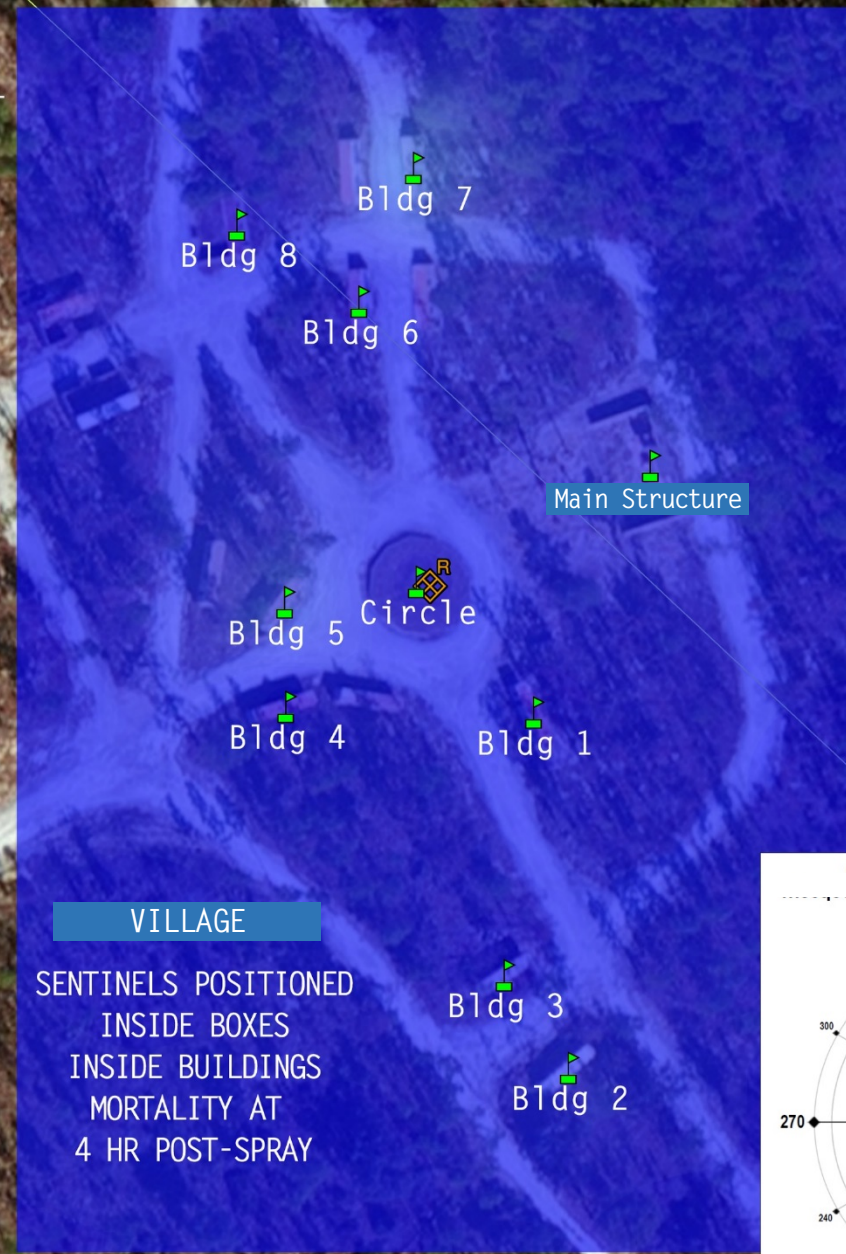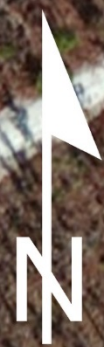

**VILLAGE**  
 SENTINELS POSITIONED  
 INSIDE BOXES  
 INSIDE BUILDINGS  
 MORTALITY AT  
 4 HR POST-SPRAY

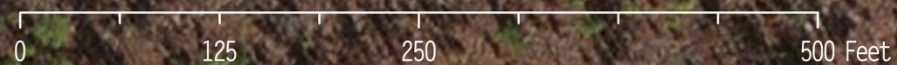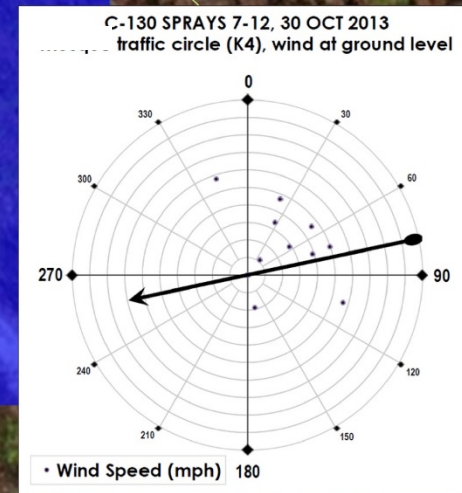



**Figure S45**  
 30 October 2013  
 8003 nozzles  
 Village  
 12 hr mortality  
 Indoors **IN BOX**

USAF / USDA-ARS-CMAVE / NECE  
 DWFP COLLABORATIVE FIELD TRIAL  
 2013-10-30  
 CAMP BLANDING JOINT TRAINING CENTER, FL  
**VILLAGE**  
**NALED** AERIAL APPLICATION  
 AE. AEGYPTI TARGET  
 SIX PASSES UPWIND OF EACH VILLAGE  
 8003 TEEJET NOZZLES

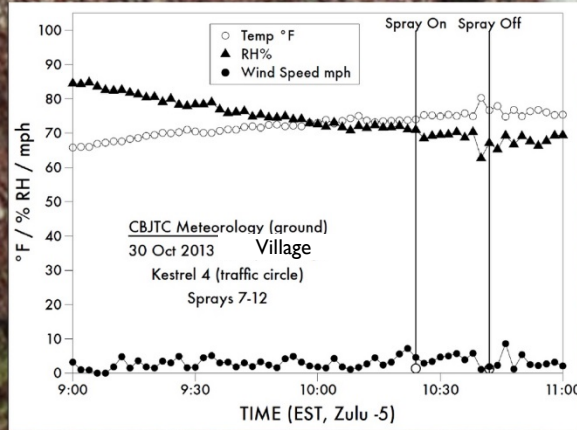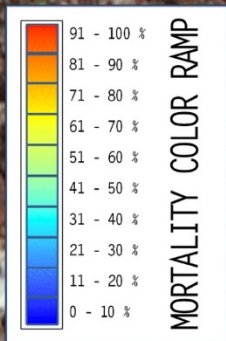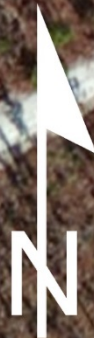

0 125 250 500 Feet

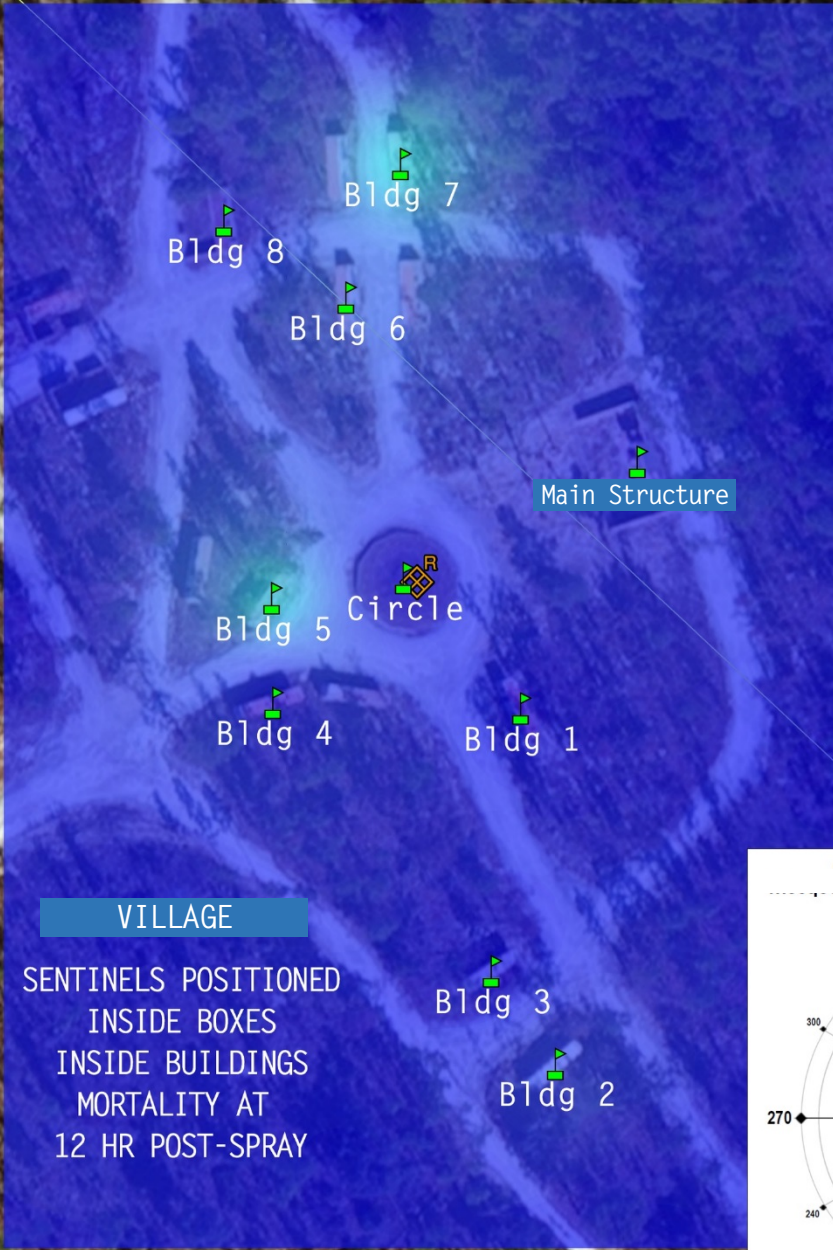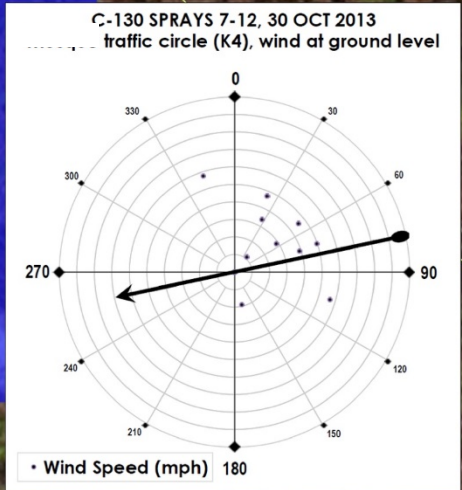

**Figure S46**  
 30 October 2013  
 8003 nozzles  
 Village  
 1 hr mortality  
 Indoors **ON FLOOR**

USAF / USDA-ARS-CMAVE / NECE  
 DWFP COLLABORATIVE FIELD TRIAL  
 2013-10-30  
 CAMP BLANDING JOINT TRAINING CENTER, FL  
**VILLAGE**  
**NALED** AERIAL APPLICATION  
 AE. AEGYPTI TARGET  
 SIX PASSES UPWIND OF EACH VILLAGE  
 8003 TEEJET NOZZLES

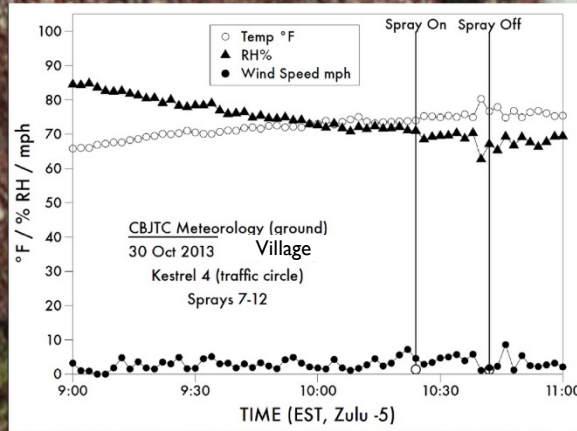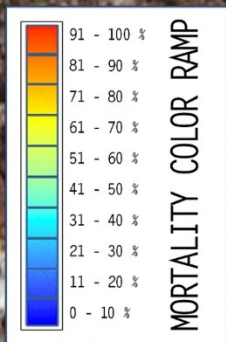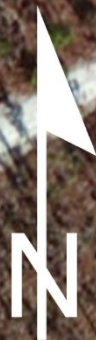

0 125 250 500 Feet

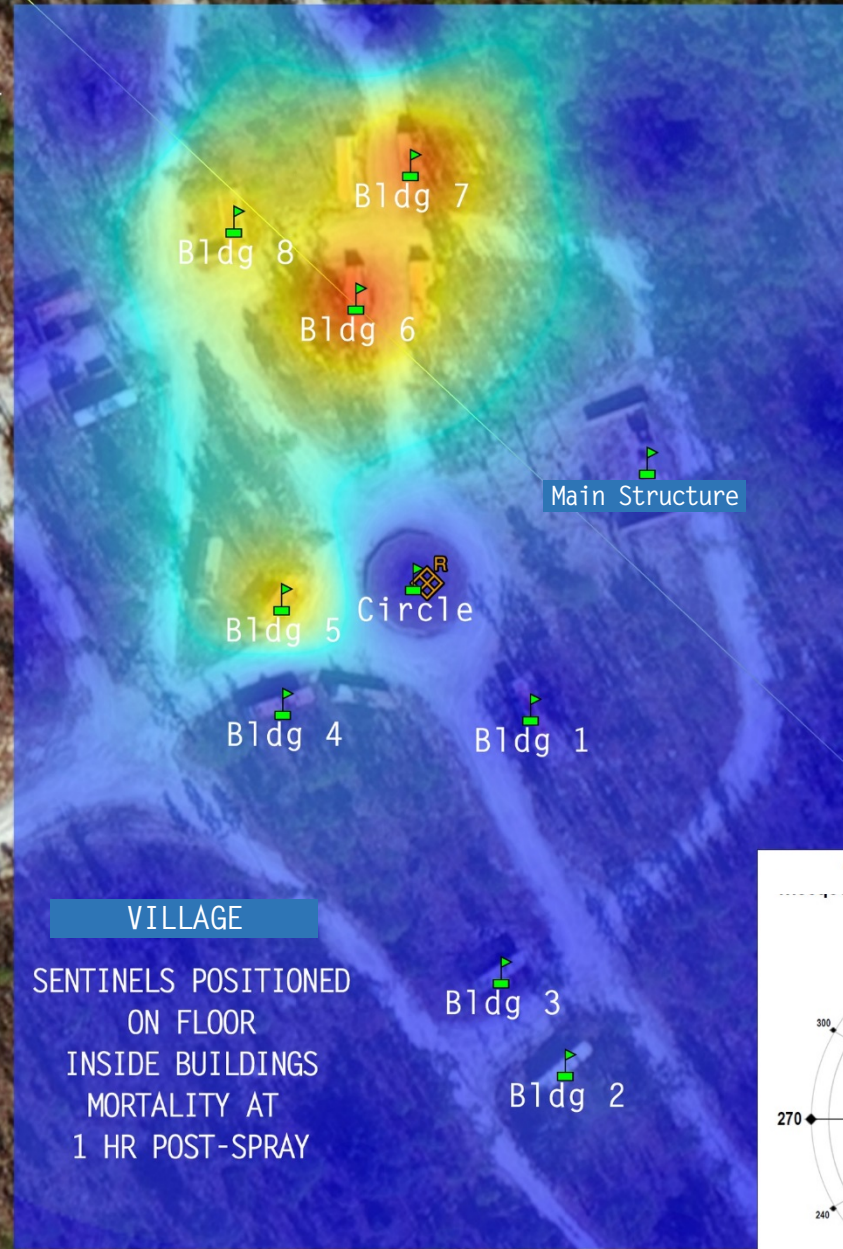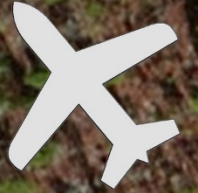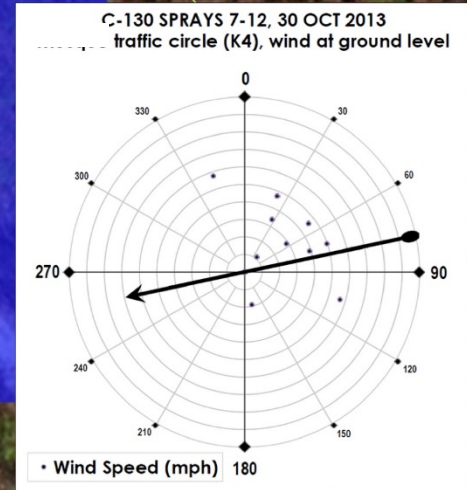

**Figure S47**  
 30 October 2013  
 8003 nozzles  
 Village  
 4 hr mortality  
 Indoors **ON FLOOR**

USAF / USDA-ARS-CMAVE / NECE  
 DWFP COLLABORATIVE FIELD TRIAL  
 2013-10-30  
 CAMP BLANDING JOINT TRAINING CENTER, FL  
**VILLAGE**  
**NALED** AERIAL APPLICATION  
 AE. AEGYPTI TARGET  
 SIX PASSES UPWIND OF EACH VILLAGE  
 8003 TEEJET NOZZLES

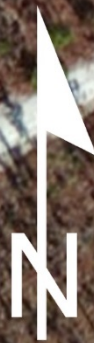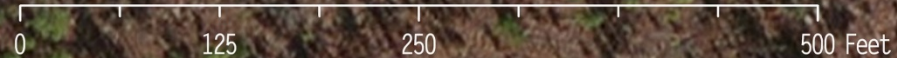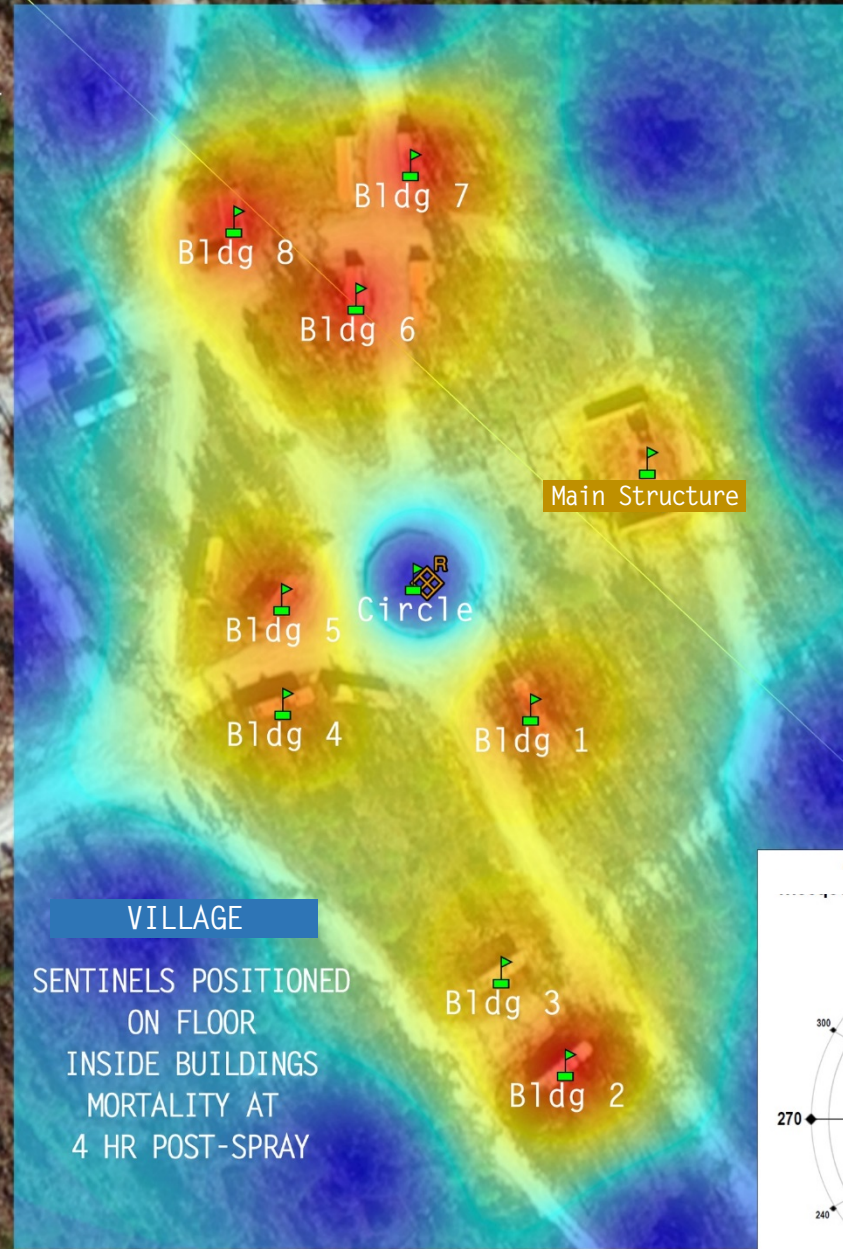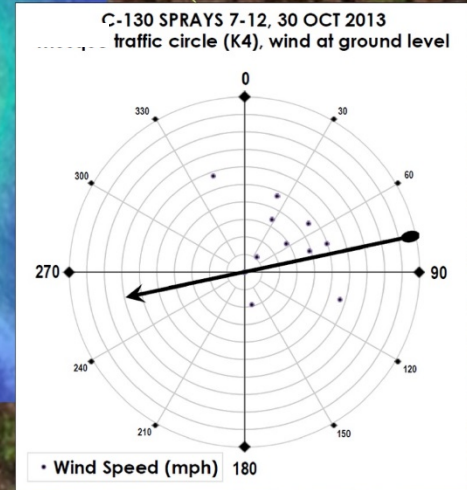

**Figure S48**  
 30 October 2013  
 8003 nozzles  
 Village  
 12 hr mortality  
 Indoors **ON FLOOR**

USAF / USDA-ARS-CMAVE / NECE  
 DWFP COLLABORATIVE FIELD TRIAL  
 2013-10-30  
 CAMP BLANDING JOINT TRAINING CENTER, FL  
**VILLAGE**  
**NALED** AERIAL APPLICATION  
 AE. AEGYPTI TARGET  
 SIX PASSES UPWIND OF EACH VILLAGE  
 8003 TEEJET NOZZLES

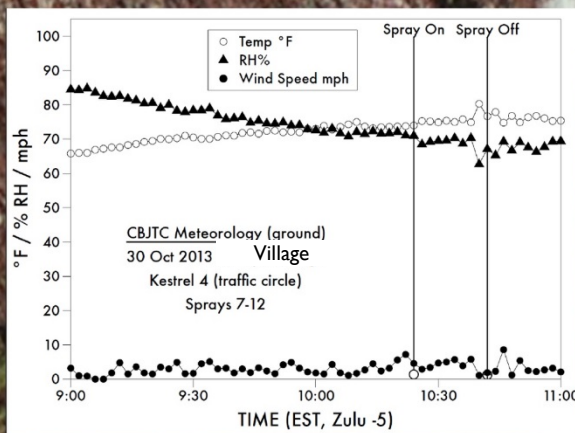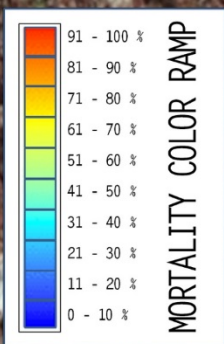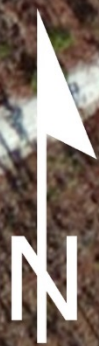

0 125 250 500 Feet

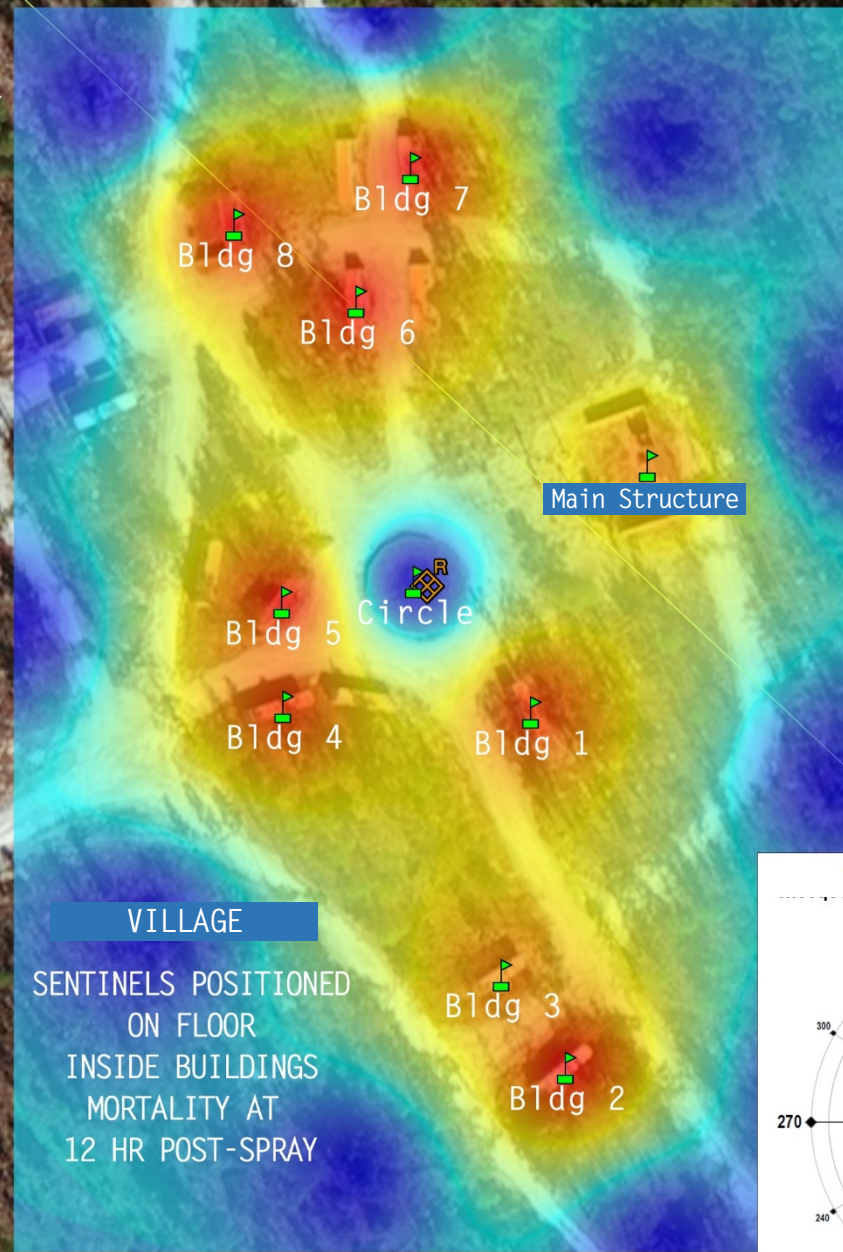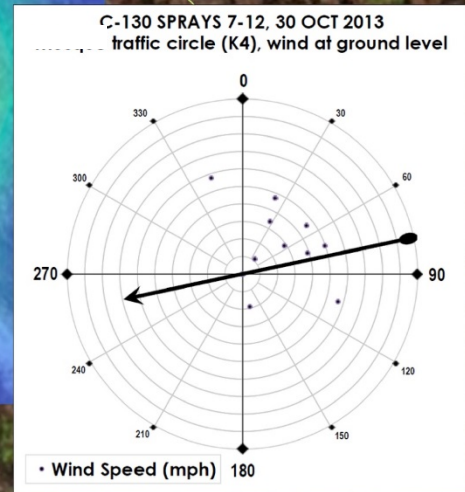

**SET E**

S49–S50 Figs. Naled droplet densities, MOU 29 Oct.

# Figure S49

29 October 2013

800I nozzles

MOUT South and nearby road Transect.

Droplet density (uncorrected) on 1/8-in spinning rods mounted on FLB spinners, in droplets per mm<sup>2</sup>.

Note value of 33.62 in red with a black background to distinguish the FLB spinner located on a rooftop. All other values in red (with white background) represent FLB spinners at ground level.

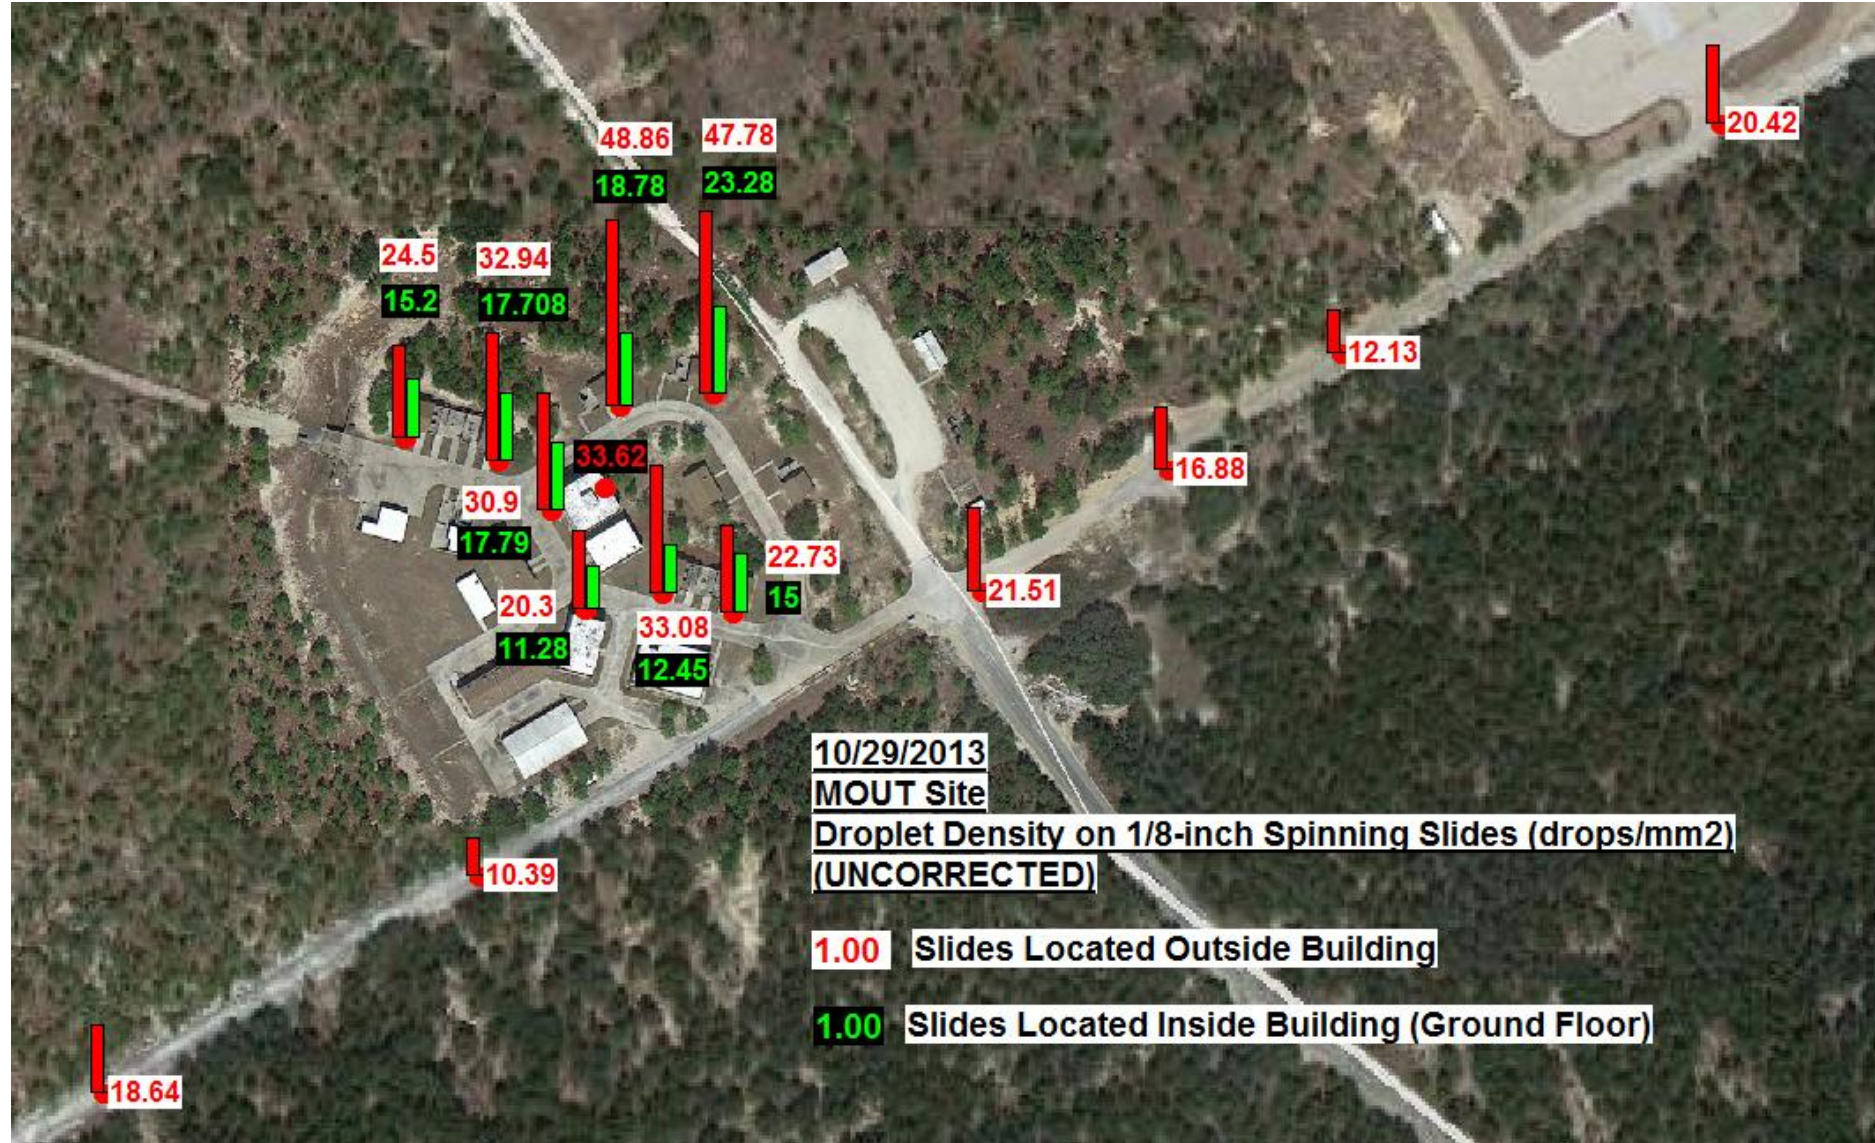

**Figure S50**

29 October 2013

8001 nozzles

MOUT South and nearby  
road Transect.

Droplet density  
(uncorrected) on 1/8-in  
spinning rods mounted on  
**outdoor** FLB spinners, in  
droplets per mm<sup>2</sup>,  
represented as a 'heat map'  
to approximate transitions  
among values at point  
measurement locations.

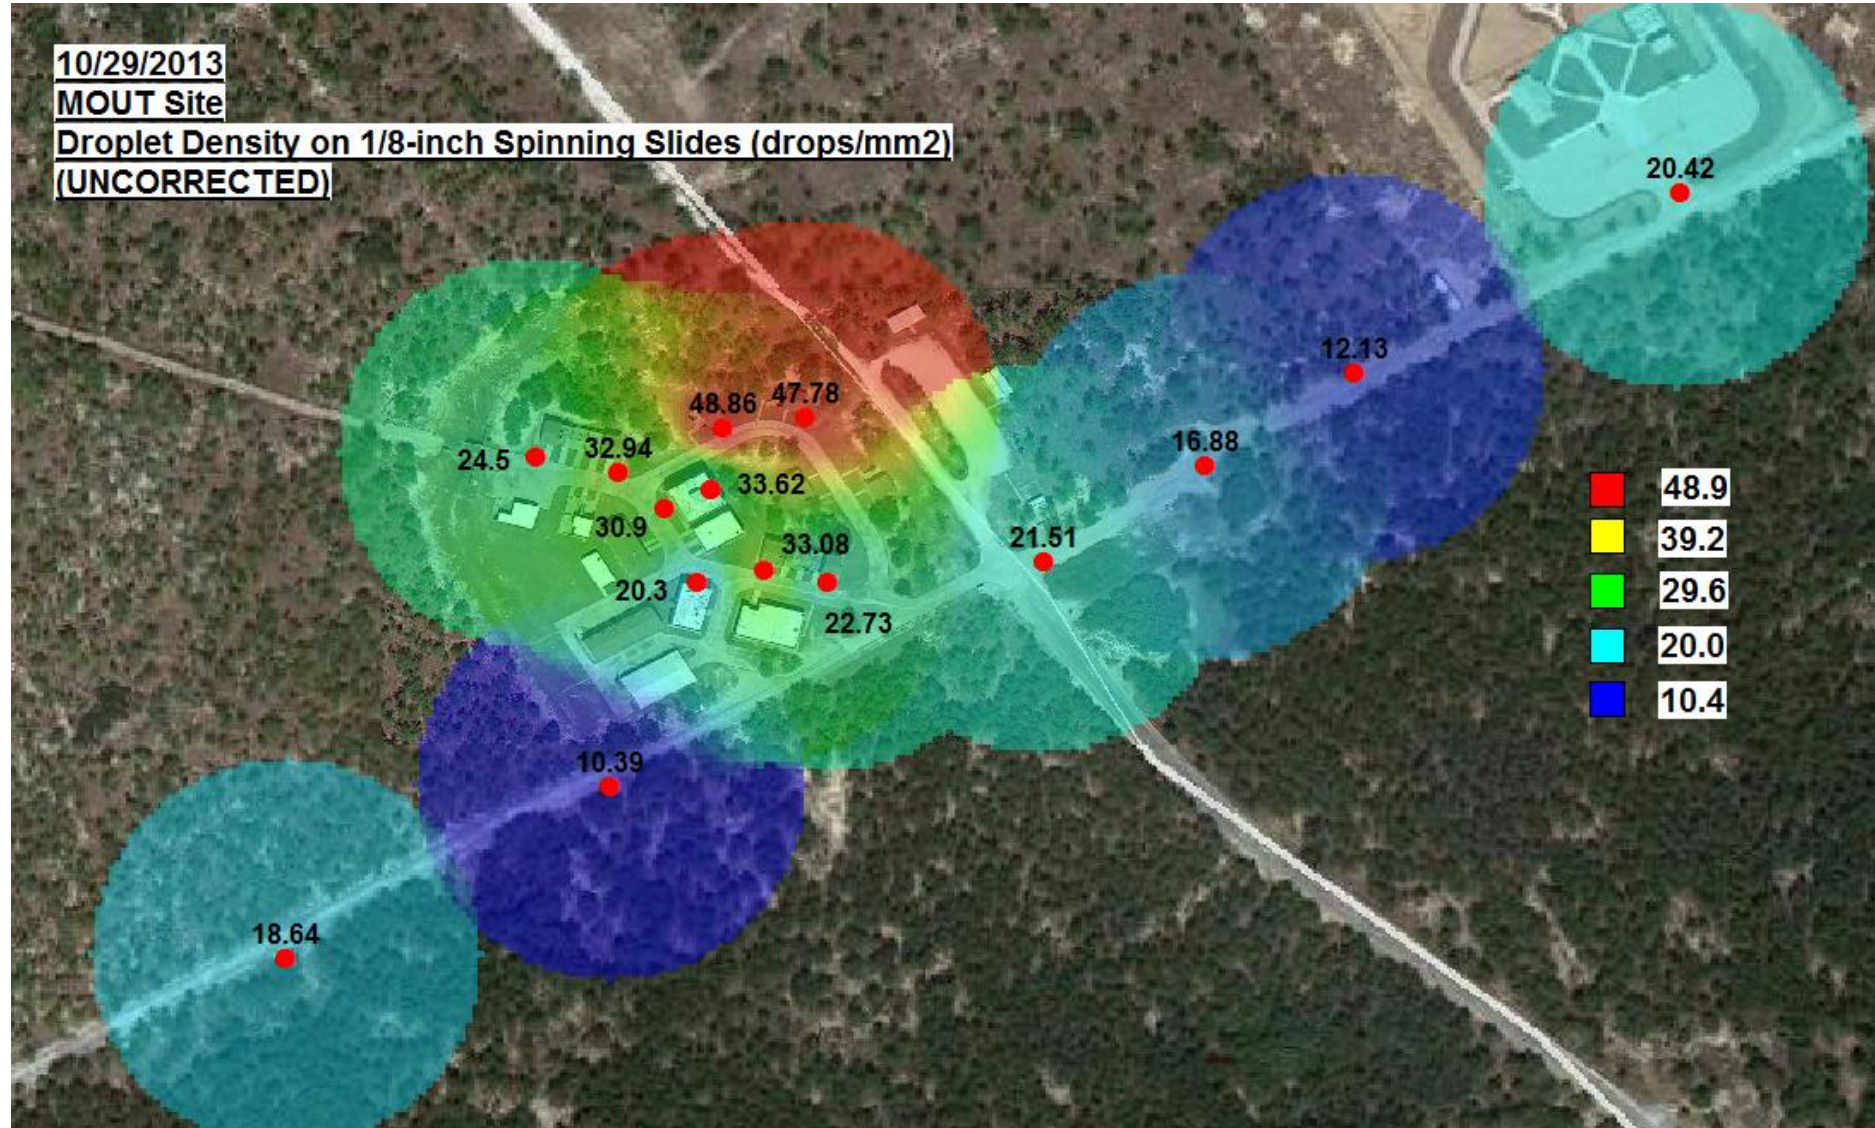

**SET F**

S51–S52 Figs. Naled droplet densities, MOU 30 Oct.



## Figure S51

30 October 2013

8003 nozzles

MOUT South and nearby  
road Transect.

Droplet density  
(uncorrected) on 1/8-in  
spinning rods mounted on  
FLB spinners, in droplets per  
 $\text{mm}^2$ .

Note value of 33.62 in red  
with a **yellow** background  
to distinguish the FLB  
spinner located on a rooftop.  
All other values in red (with  
white background) represent  
FLB spinners at ground level.

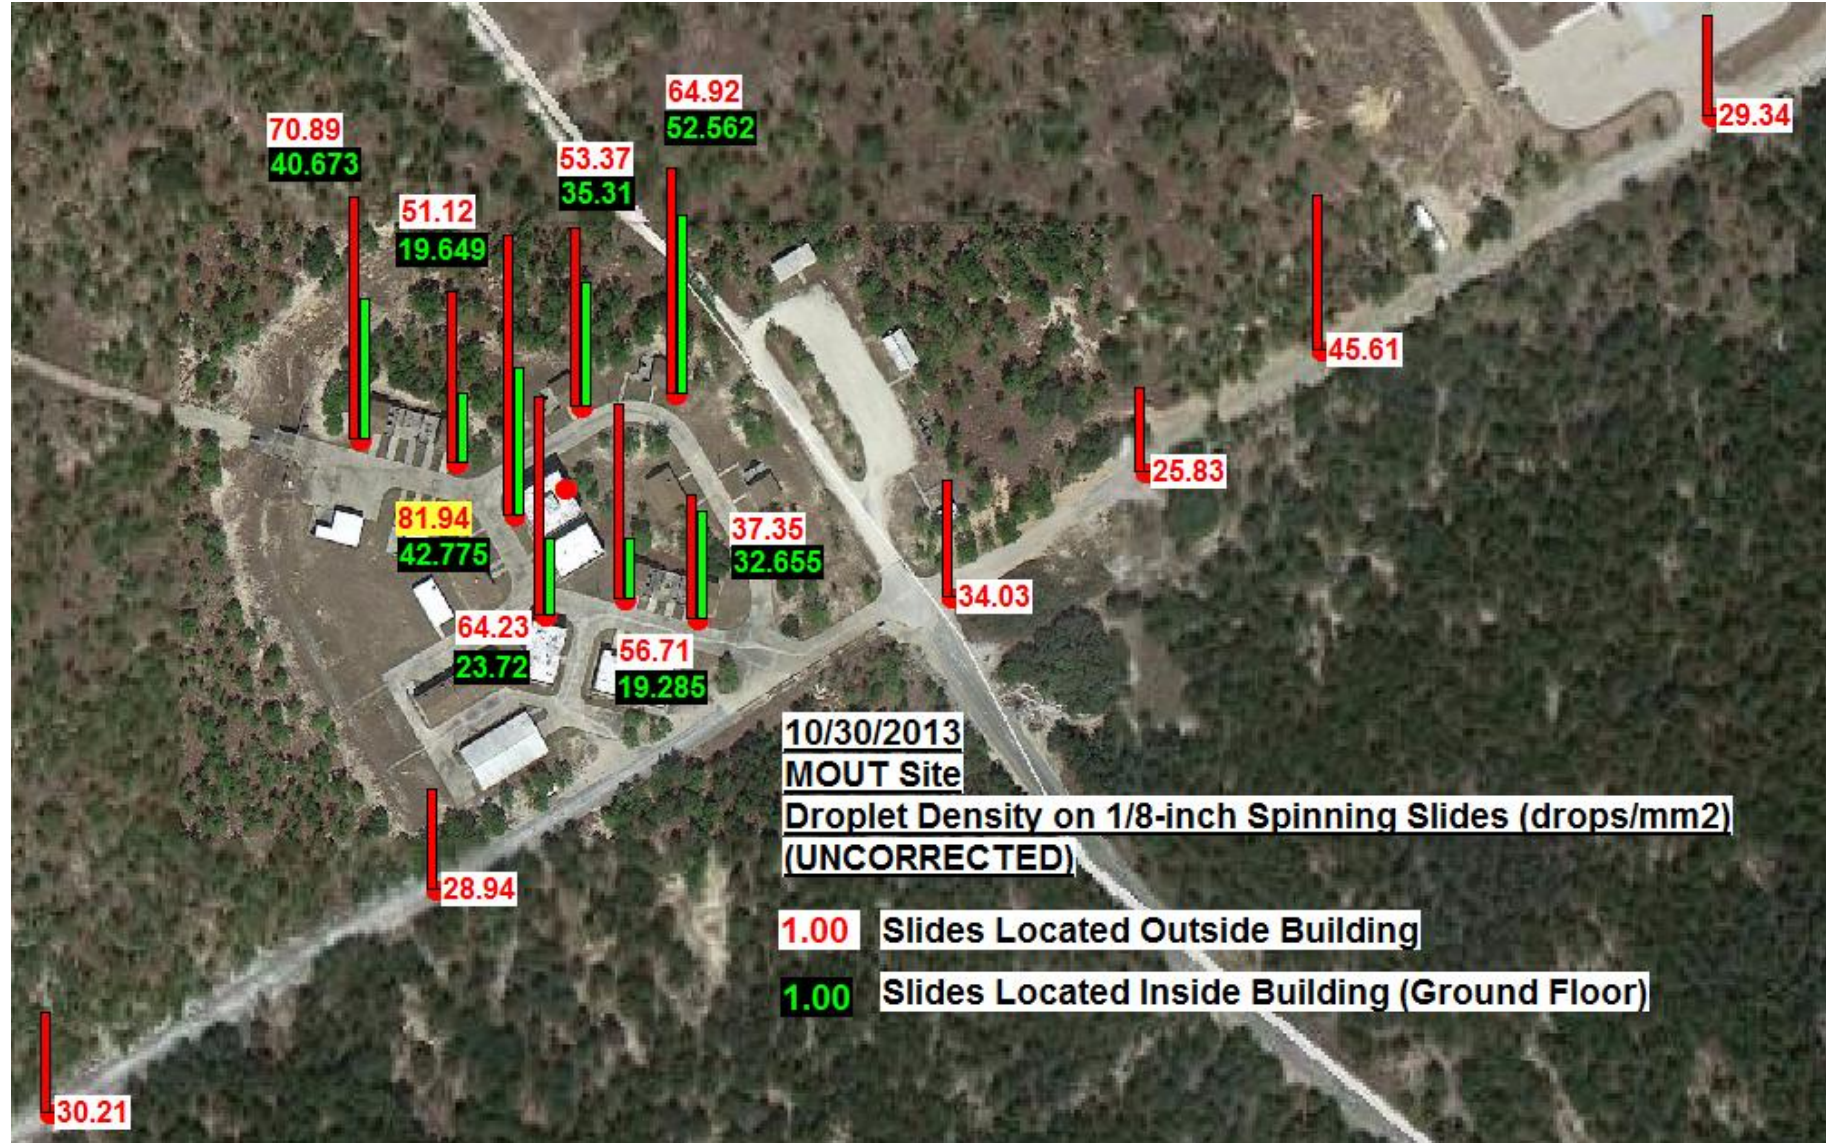

**Figure S52**

30 October 2013

8003 nozzles

MOUT South and nearby  
road Transect.

Droplet density  
(uncorrected) on 1/8-in  
spinning rods mounted on  
**outdoor** FLB spinners, in  
droplets per mm<sup>2</sup>,  
represented as a 'heat map'  
to approximate transitions  
among values at point  
measurement locations.

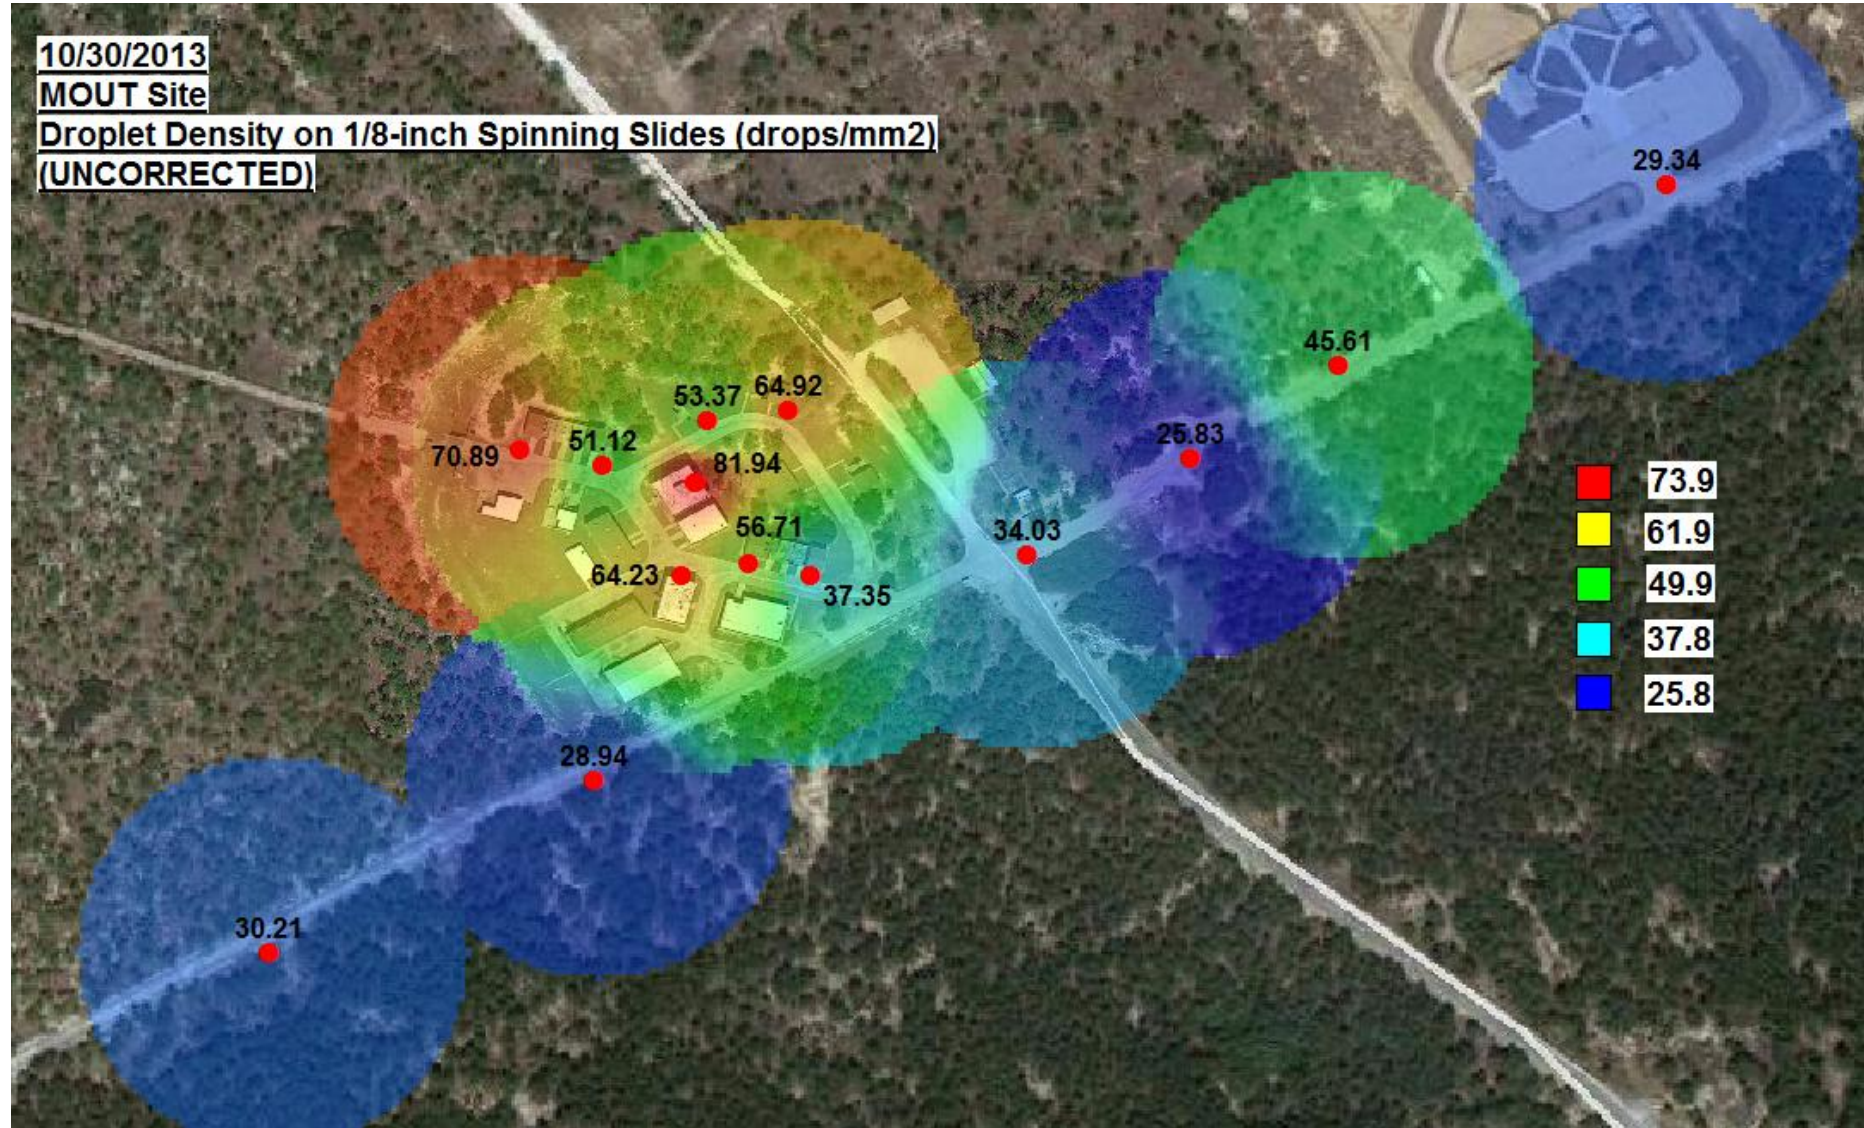

**SET G**

S53–S54 Figs. Naled droplet densities, Village 29 Oct.

# Figure S53

29 October 2013

8001 nozzles

Village and nearby road

Transect

Droplet density (uncorrected) on 1/8-in spinning rods mounted on FLB spinners, in droplets per mm<sup>2</sup>.

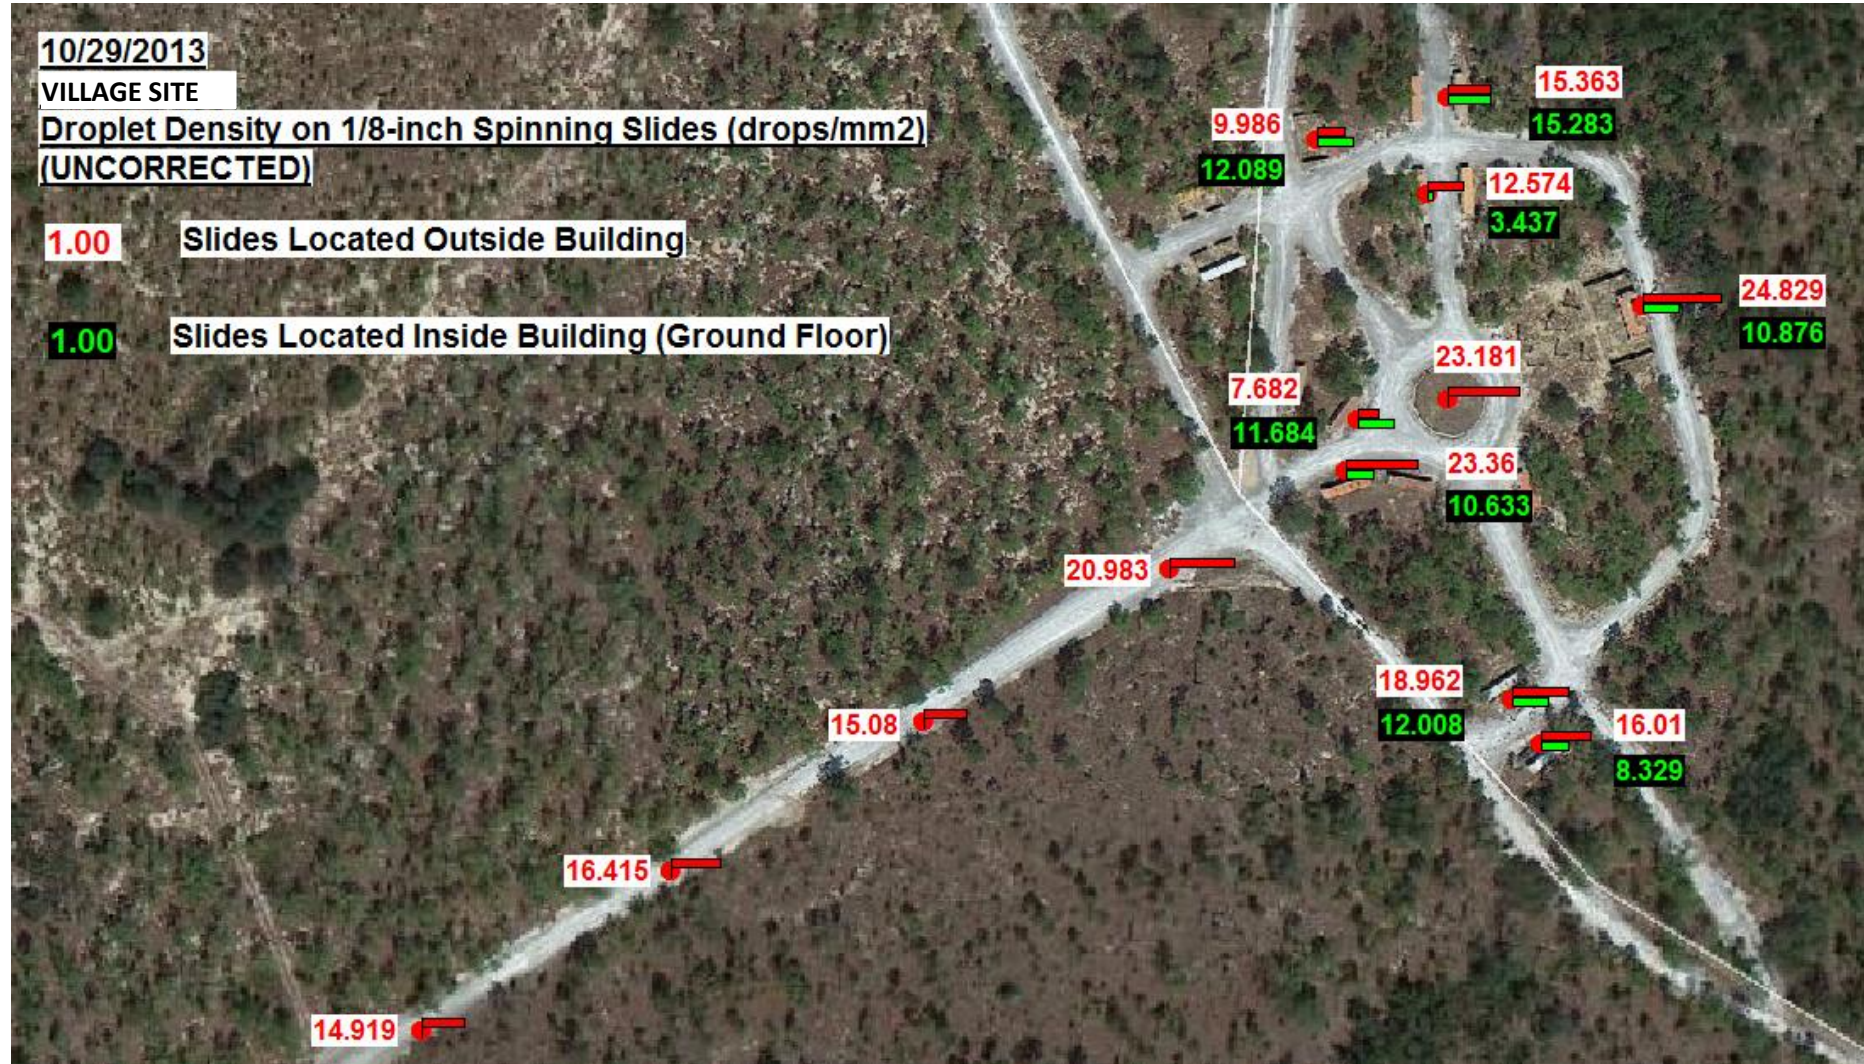

## Figure S54

29 October 2013

800I nozzles

Village and nearby road  
Transect.

Droplet density  
(uncorrected) on 1/8-in  
spinning rods mounted on  
**outdoor** FLB spinners, in  
droplets per mm<sup>2</sup>,  
represented as a 'heat map'  
to approximate transitions  
among values at point  
measurement locations.

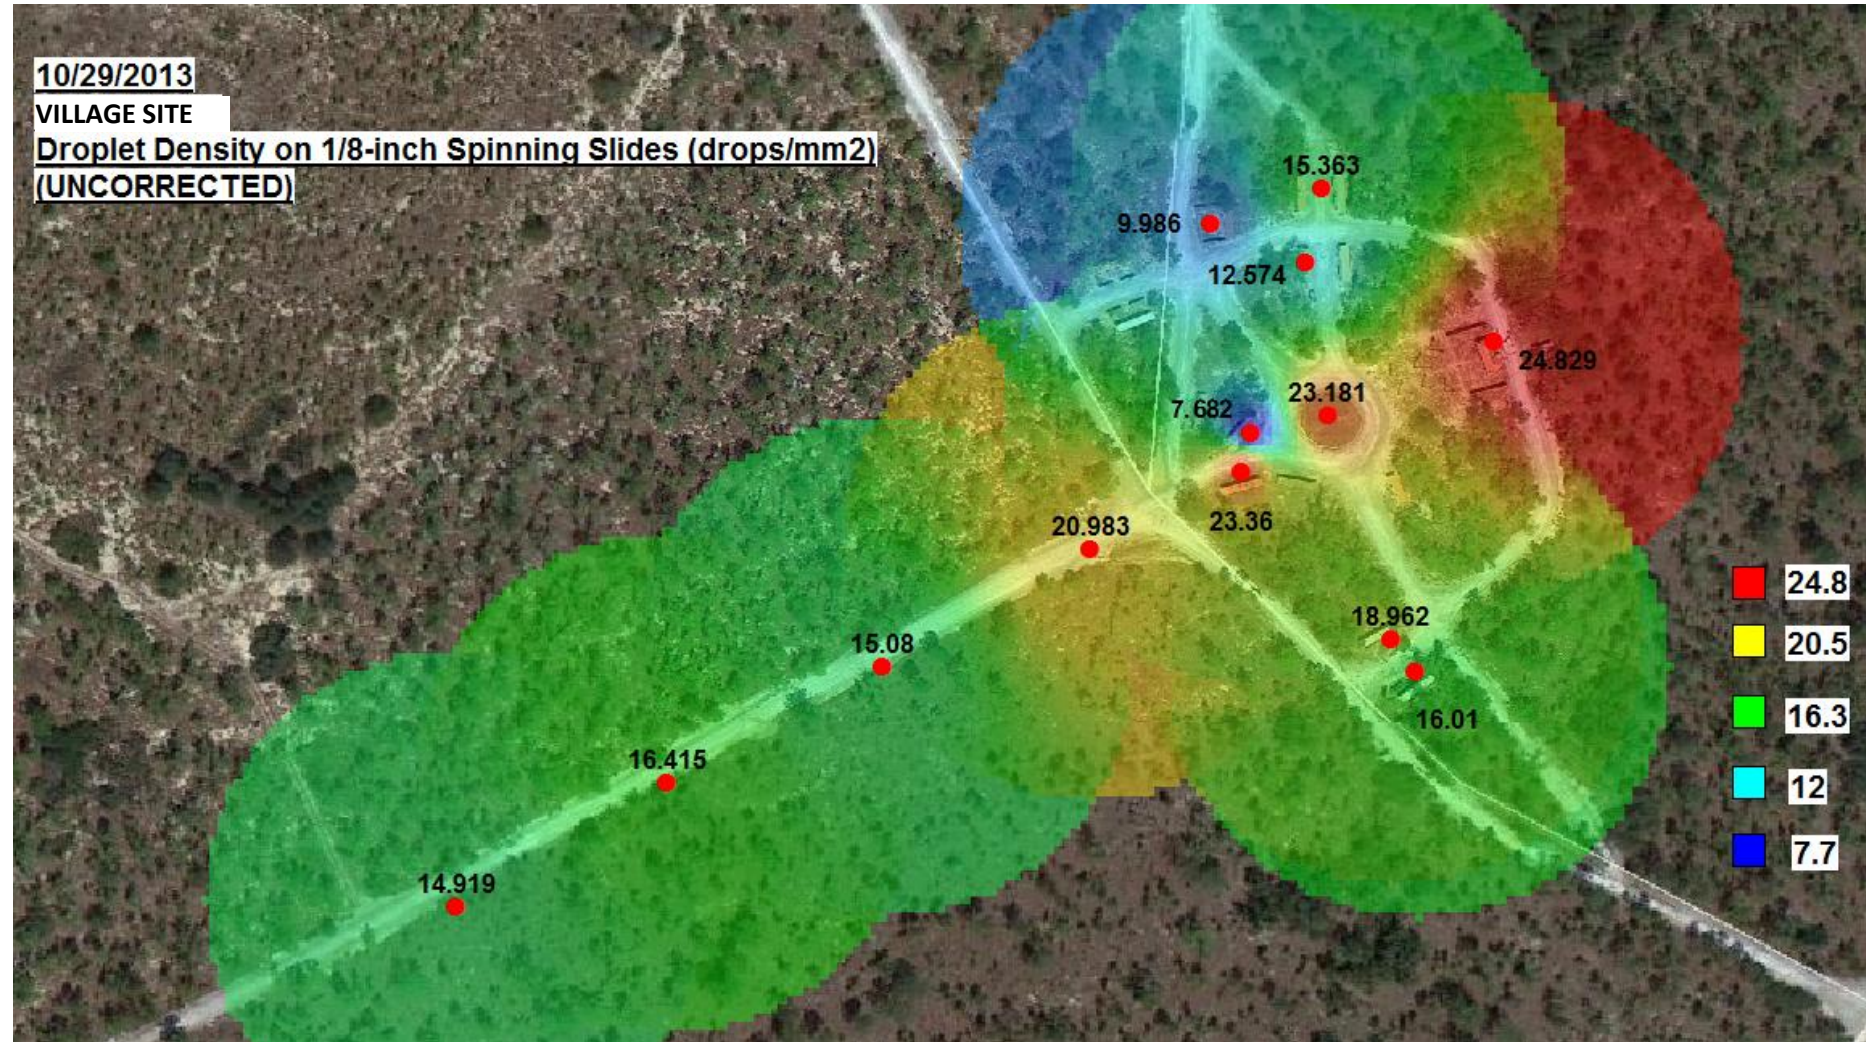

**SET H**

S55–S56 Figs. Naled droplet densities, Village 30 Oct.

# Figure S55

30 October 2013

8003 nozzles

Village and nearby road

Transect

Droplet density (uncorrected) on 1/8-in spinning rods mounted on FLB spinners, in droplets per mm<sup>2</sup>.

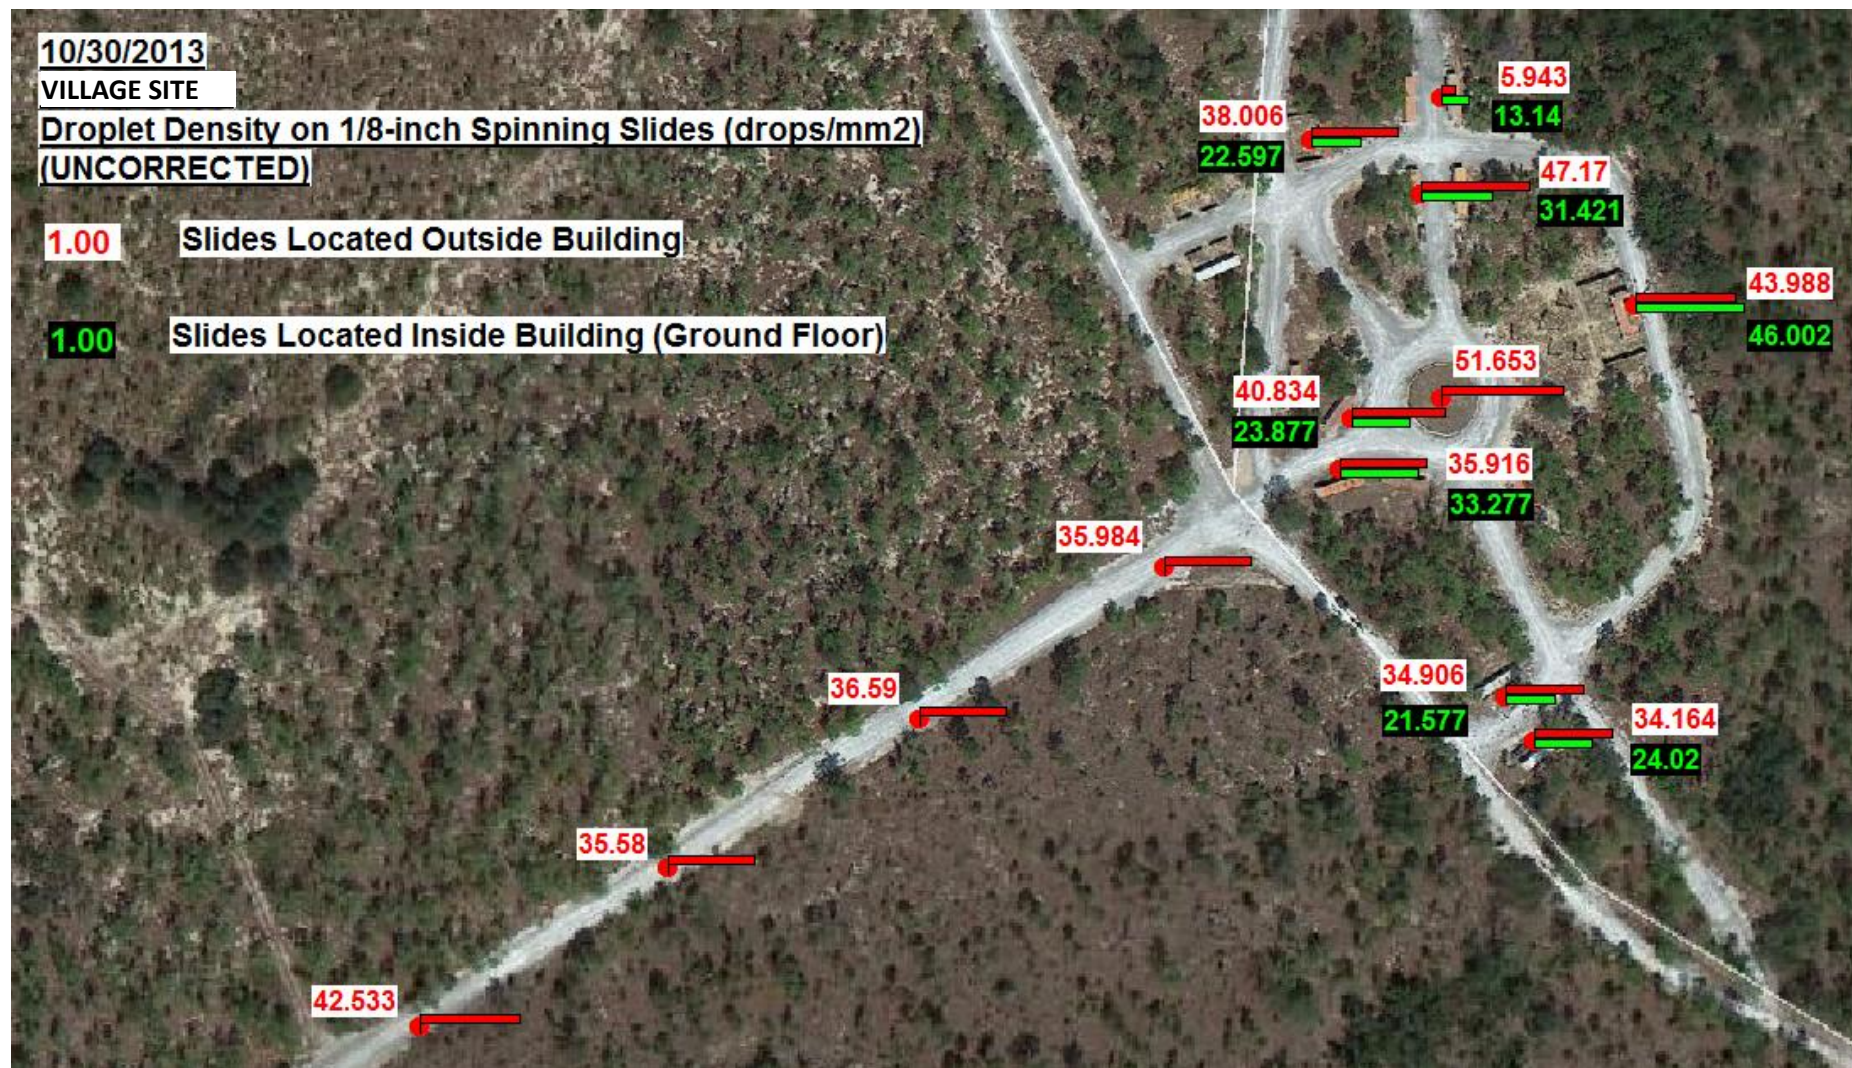

## Figure S56

30 October 2013

8003 nozzles

Village and nearby road  
Transect.

Droplet density  
(uncorrected) on 1/8-in  
spinning rods mounted on  
**outdoor** FLB spinners, in  
droplets per mm<sup>2</sup>,  
represented as a 'heat map'  
to approximate transitions  
among values at point  
measurement locations.

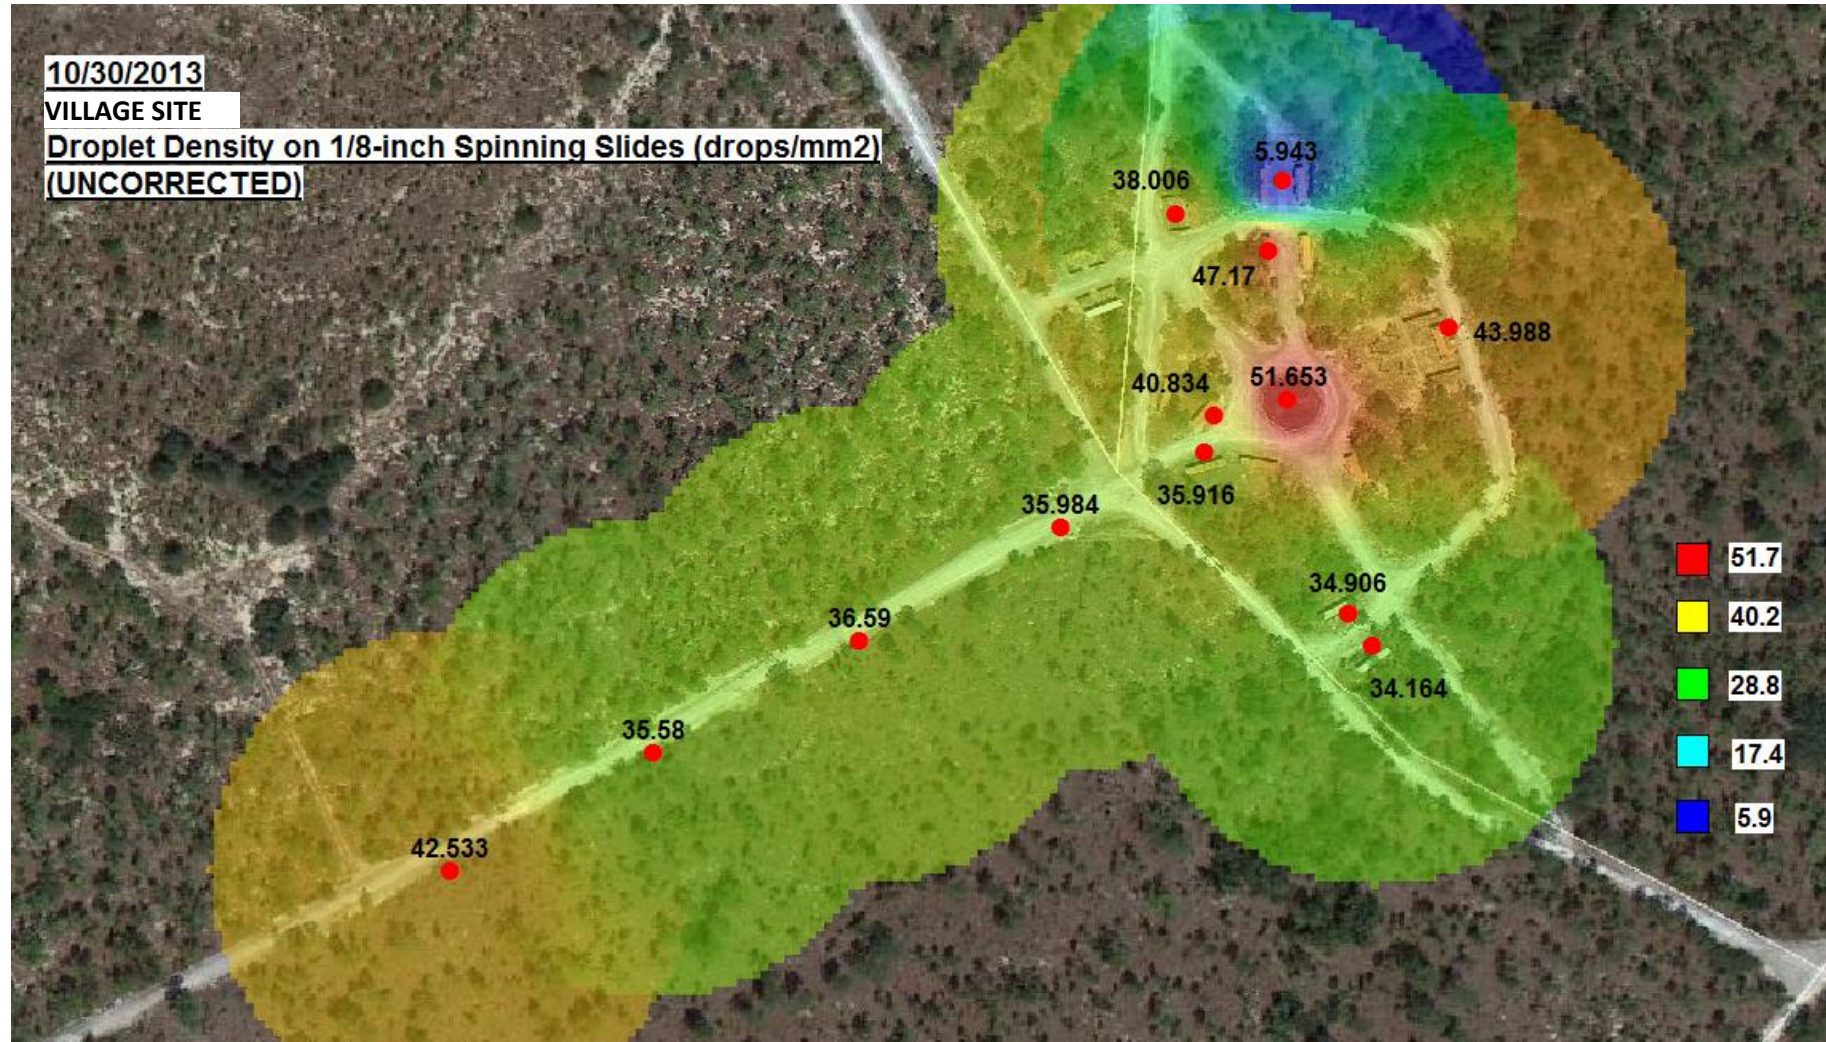



**SET I**

S57–S59 Figs. Naled droplet densities, Transects 29 Oct.

**Figure S57**  
 29 October 2013  
 800I nozzles  
 Road Transects  
 1 hr mortality

USAF / USDA-ARS-CMAVE / NECE  
 DWFP COLLABORATIVE FIELD TRIAL  
 2013-10-29  
 CAMP BLANDING JOINT TRAINING CENTER, FL

**MOUT SOUTH & VILLAGE SITES**  
**NALED AERIAL APPLICATION**  
 AE. AEGYPTI TARGET

SIX PASSES UPWIND OF EACH VILLAGE  
 SENTINEL MOSQUITOES OUTDOORS ON POLES  
 MORTALITY AT 1 HR POST-SPRAY  
 8001 TEEJET NOZZLES

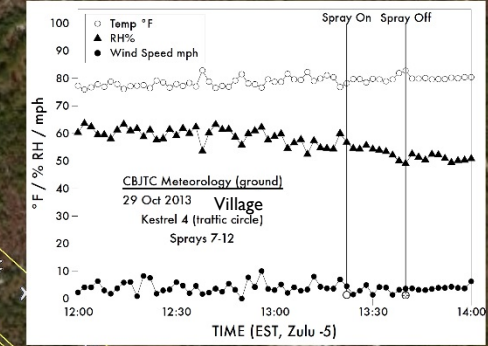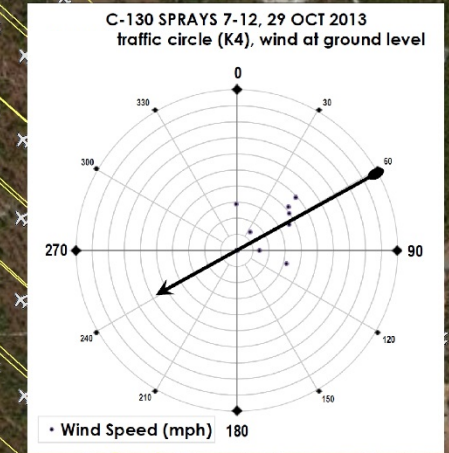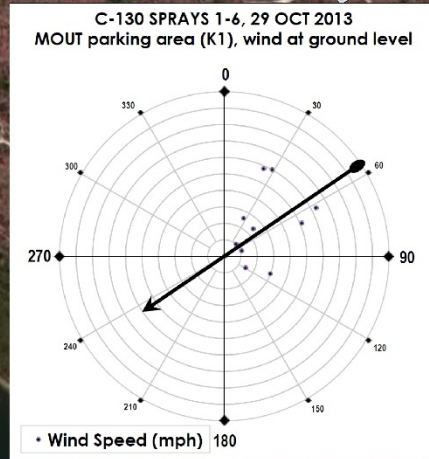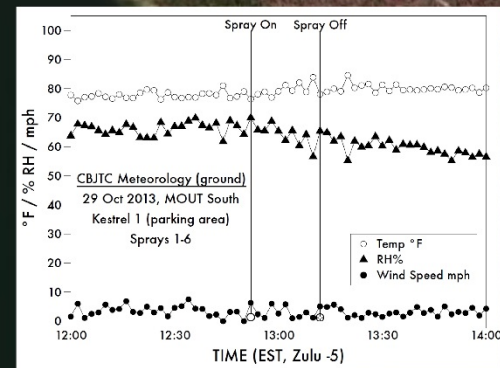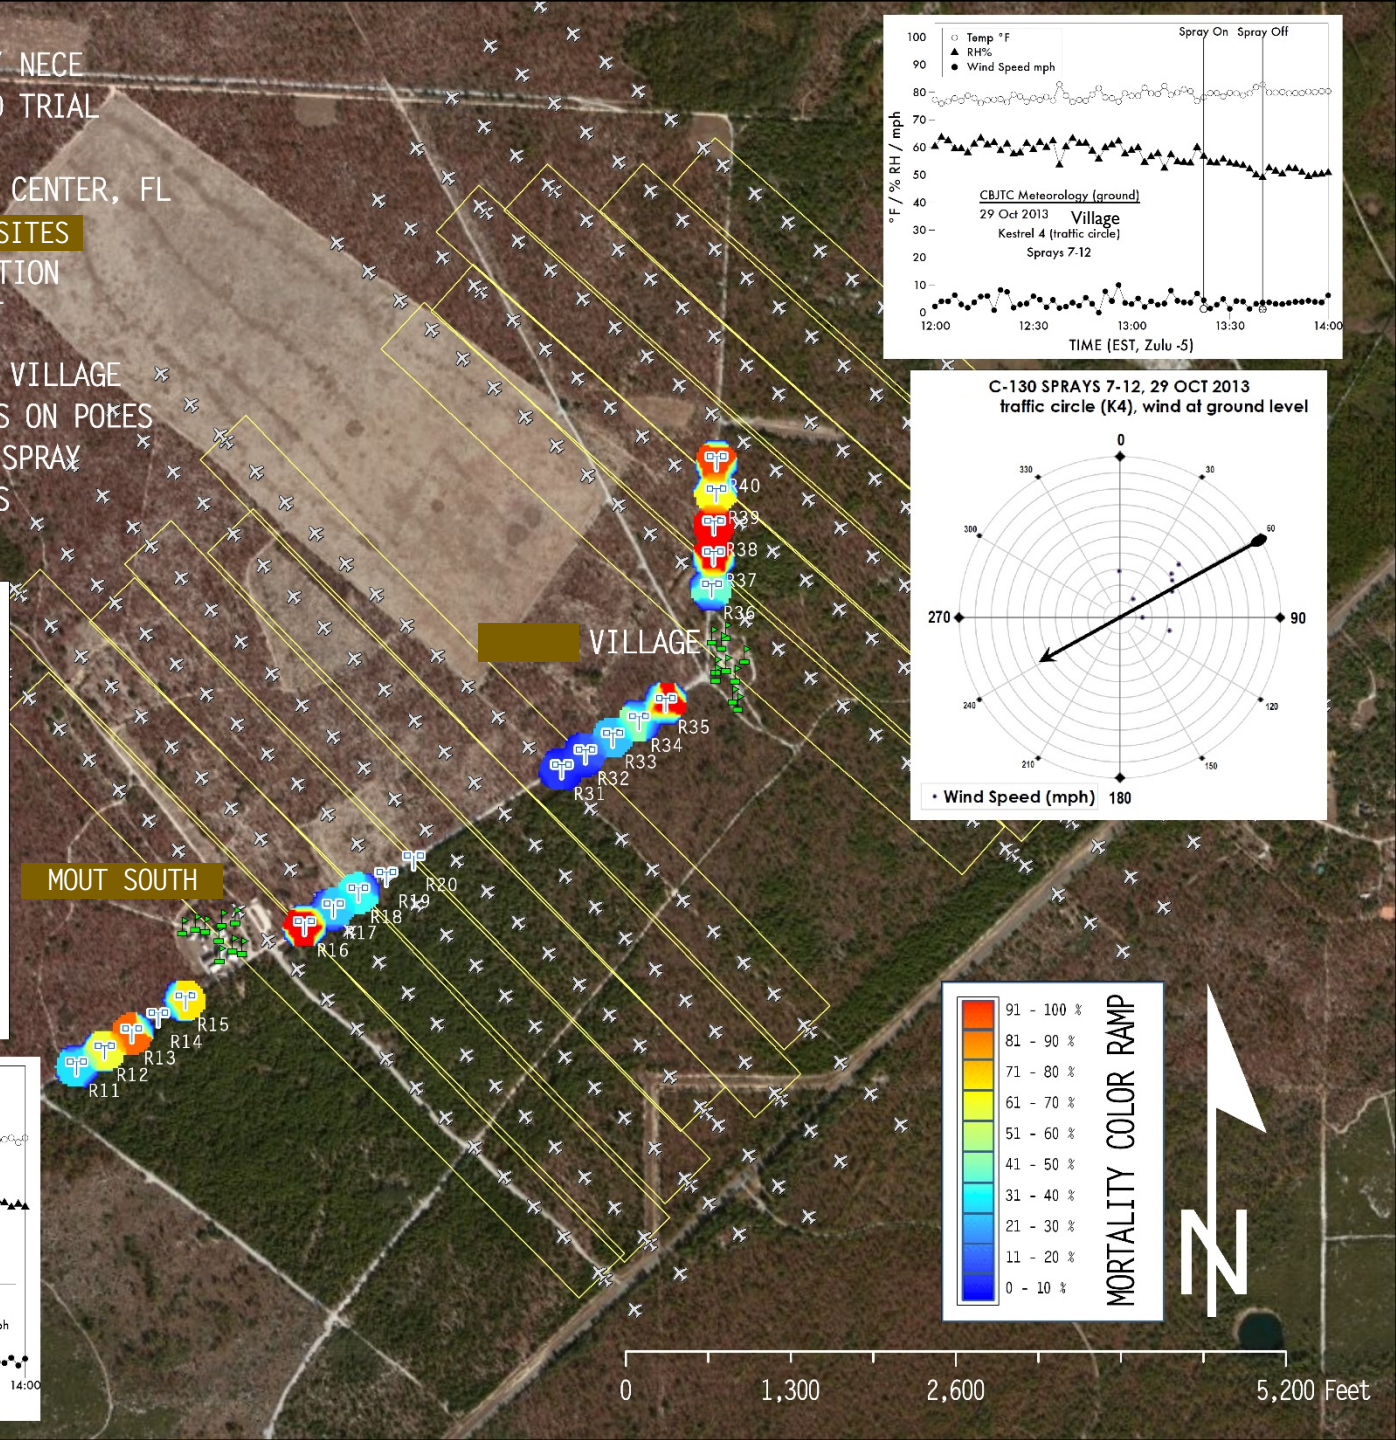

**Figure S58**  
 29 October 2013  
 800I nozzles  
 Road Transects  
 4 hr mortality

USAF / USDA-ARS-CMAVE / NECE  
 DWFP COLLABORATIVE FIELD TRIAL  
 2013-10-29  
 CAMP BLANDING JOINT TRAINING CENTER, FL

**MOUT SOUTH & VILLAGE SITES**  
**NALED AERIAL APPLICATION**  
 AE. AEGYPTI TARGET

SIX PASSES UPWIND OF EACH VILLAGE  
 SENTINEL MOSQUITOES OUTDOORS ON POLES  
 MORTALITY AT 4 HR POST-SPRAY  
 8001 TEEJET NOZZLES

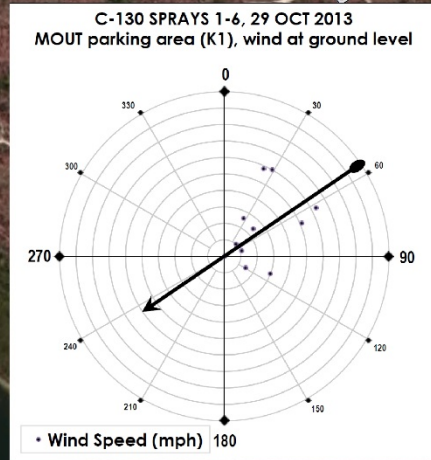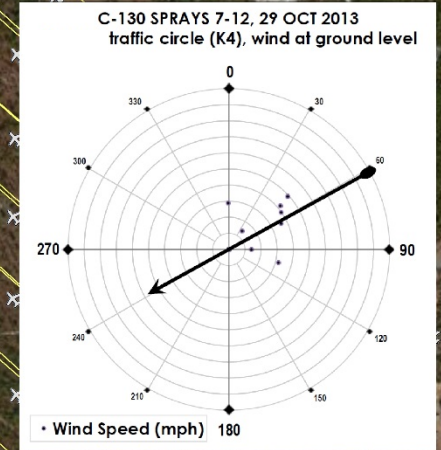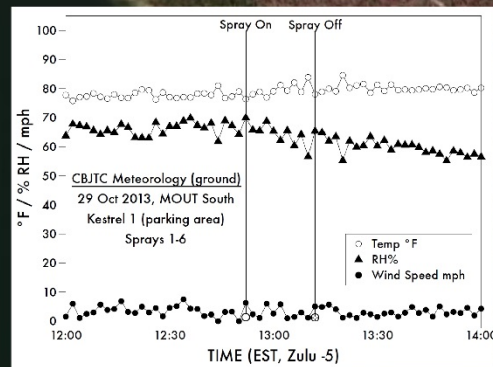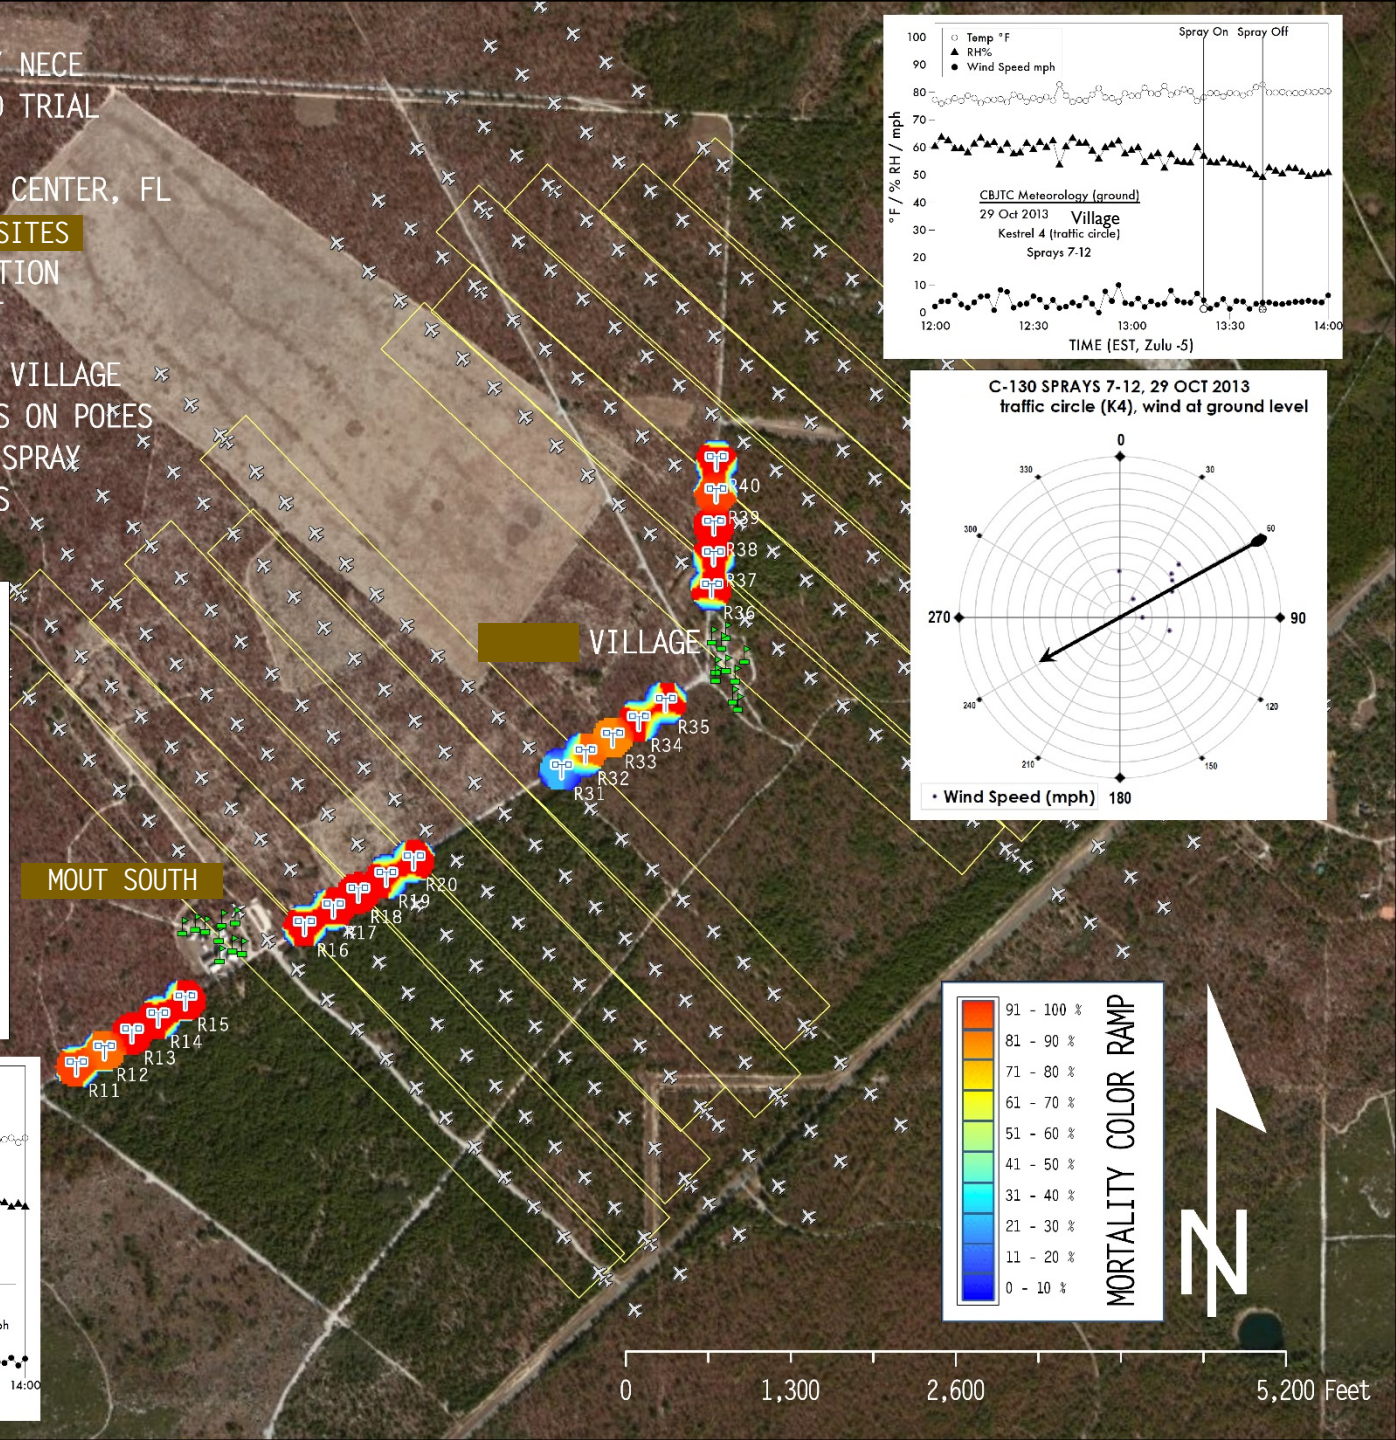

**Figure S59**  
 29 October 2013  
 800I nozzles  
 Road Transects  
 12 hr mortality

USAF / USDA-ARS-CMAVE / NECE  
 DWFP COLLABORATIVE FIELD TRIAL  
 2013-10-29  
 CAMP BLANDING JOINT TRAINING CENTER, FL

**MOUT SOUTH & VILLAGE SITES**  
**NALED AERIAL APPLICATION**  
 AE. AEGYPTI TARGET

SIX PASSES UPWIND OF EACH VILLAGE  
 SENTINEL MOSQUITOES OUTDOORS ON POLES  
 MORTALITY AT 12 HR POST-SPRAY  
 8001 TEEJET NOZZLES

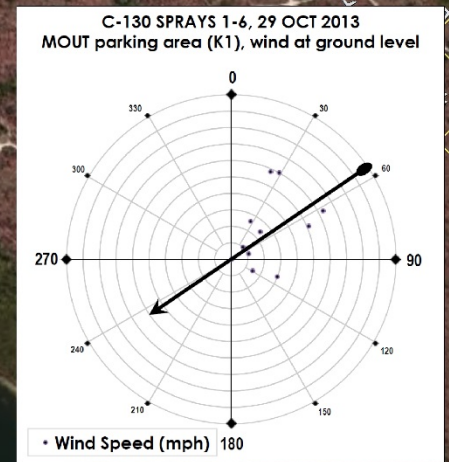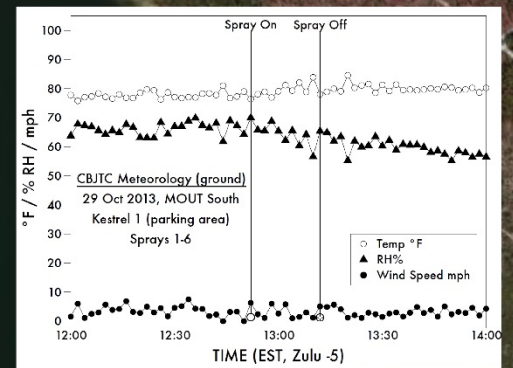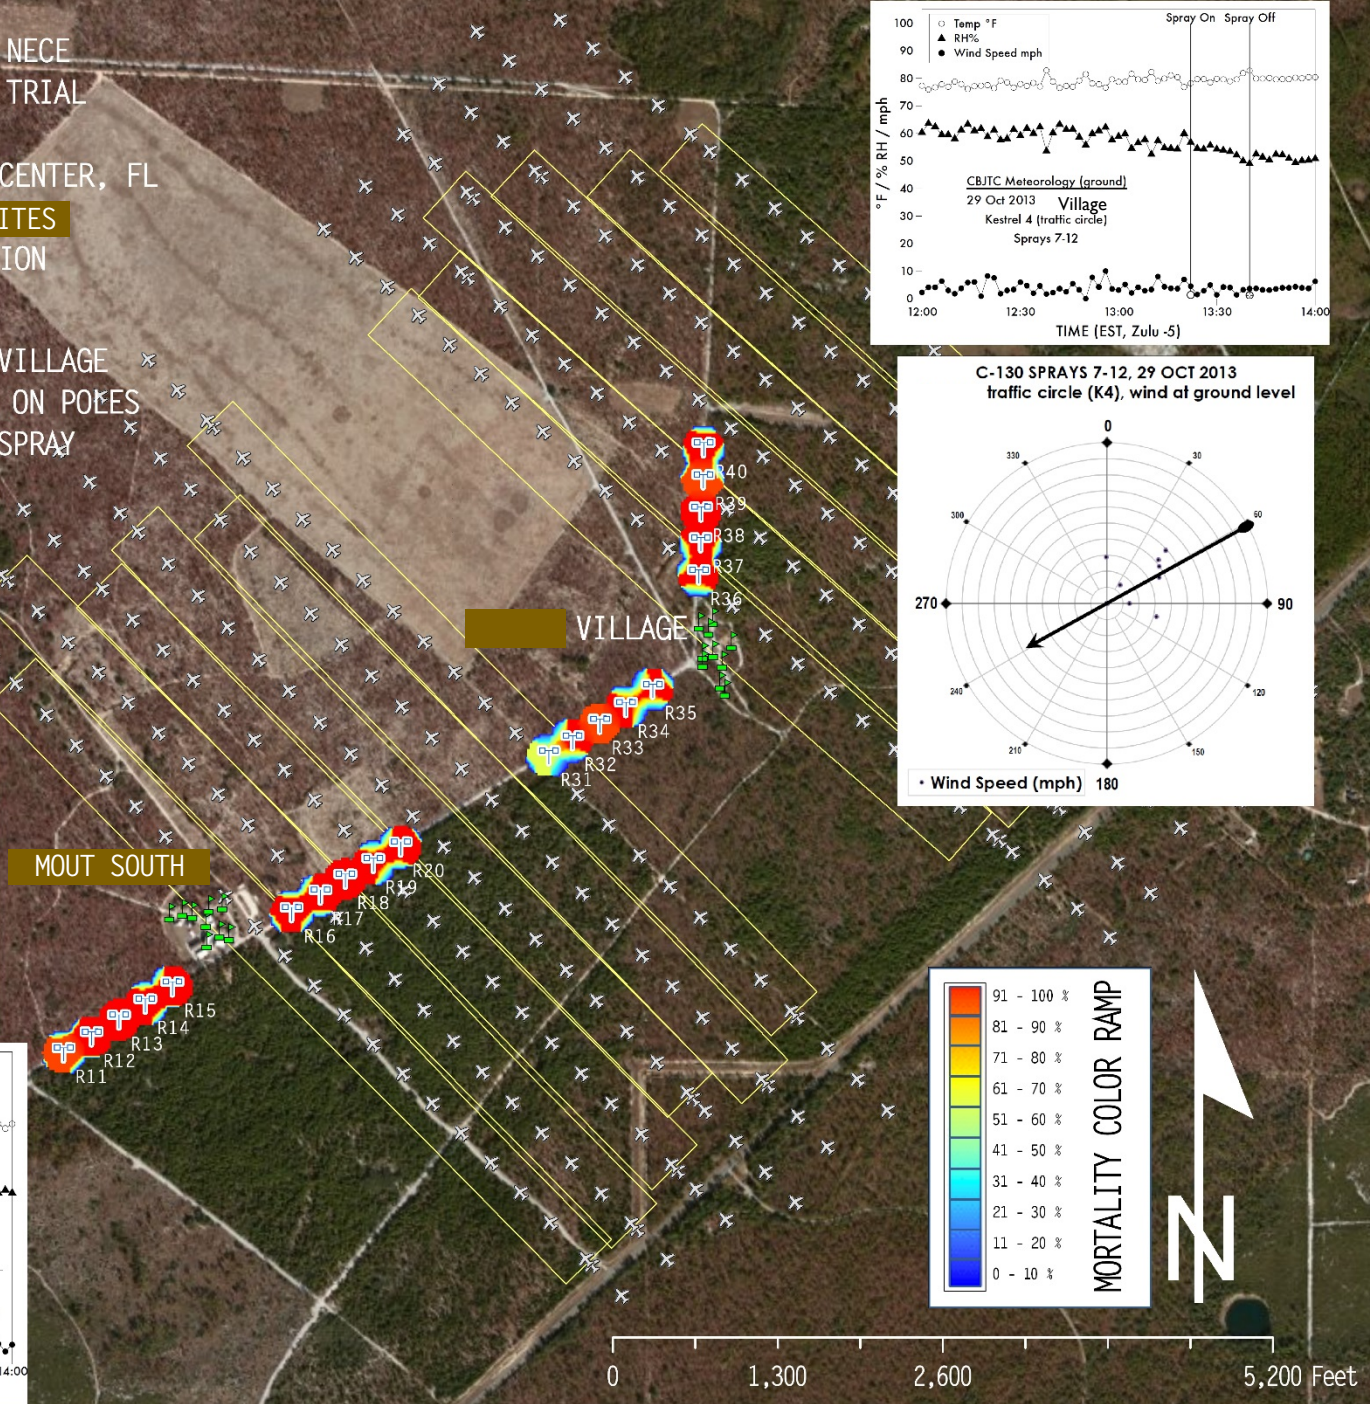

**SET J**

S60–S62 Figs. Naled droplet densities, Transects 30 Oct.

**Figure S60**  
 30 October 2013  
 8003 nozzles  
 Road Transects  
 1 hr mortality

USAF / USDA-ARS-CMAVE / NECE  
 DWFP COLLABORATIVE FIELD TRIAL  
 2013-10-30  
 CAMP BLANDING JOINT TRAINING CENTER, FL

**MOUT SOUTH & VILLAGE SITES**  
**NALED** AERIAL APPLICATION  
 AE. AEGYPTI TARGET

SIX PASSES UPWIND OF EACH VILLAGE  
 SENTINEL MOSQUITOES OUTDOORS ON POLES  
 MORTALITY AT 1 HR POST-SPRAY  
 8003 TEEJET NOZZLES

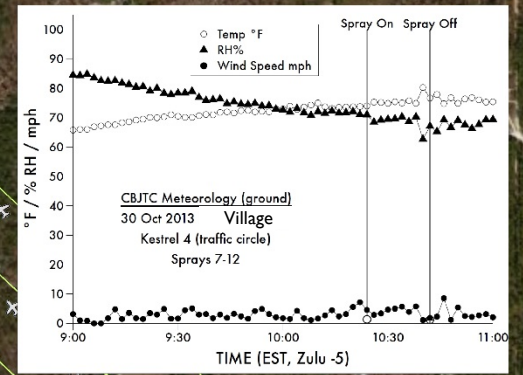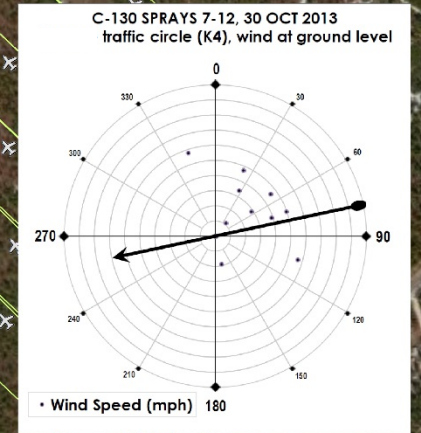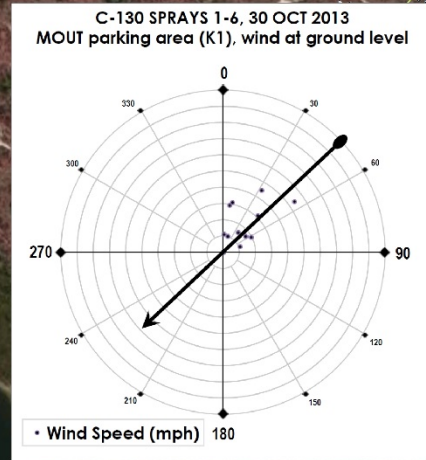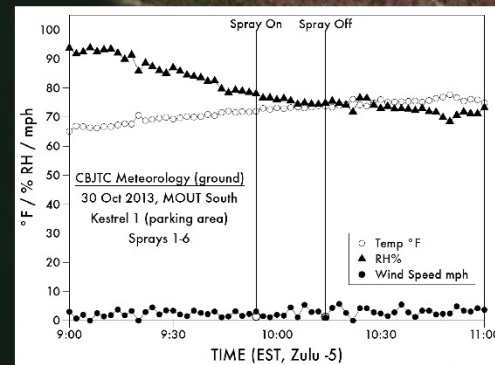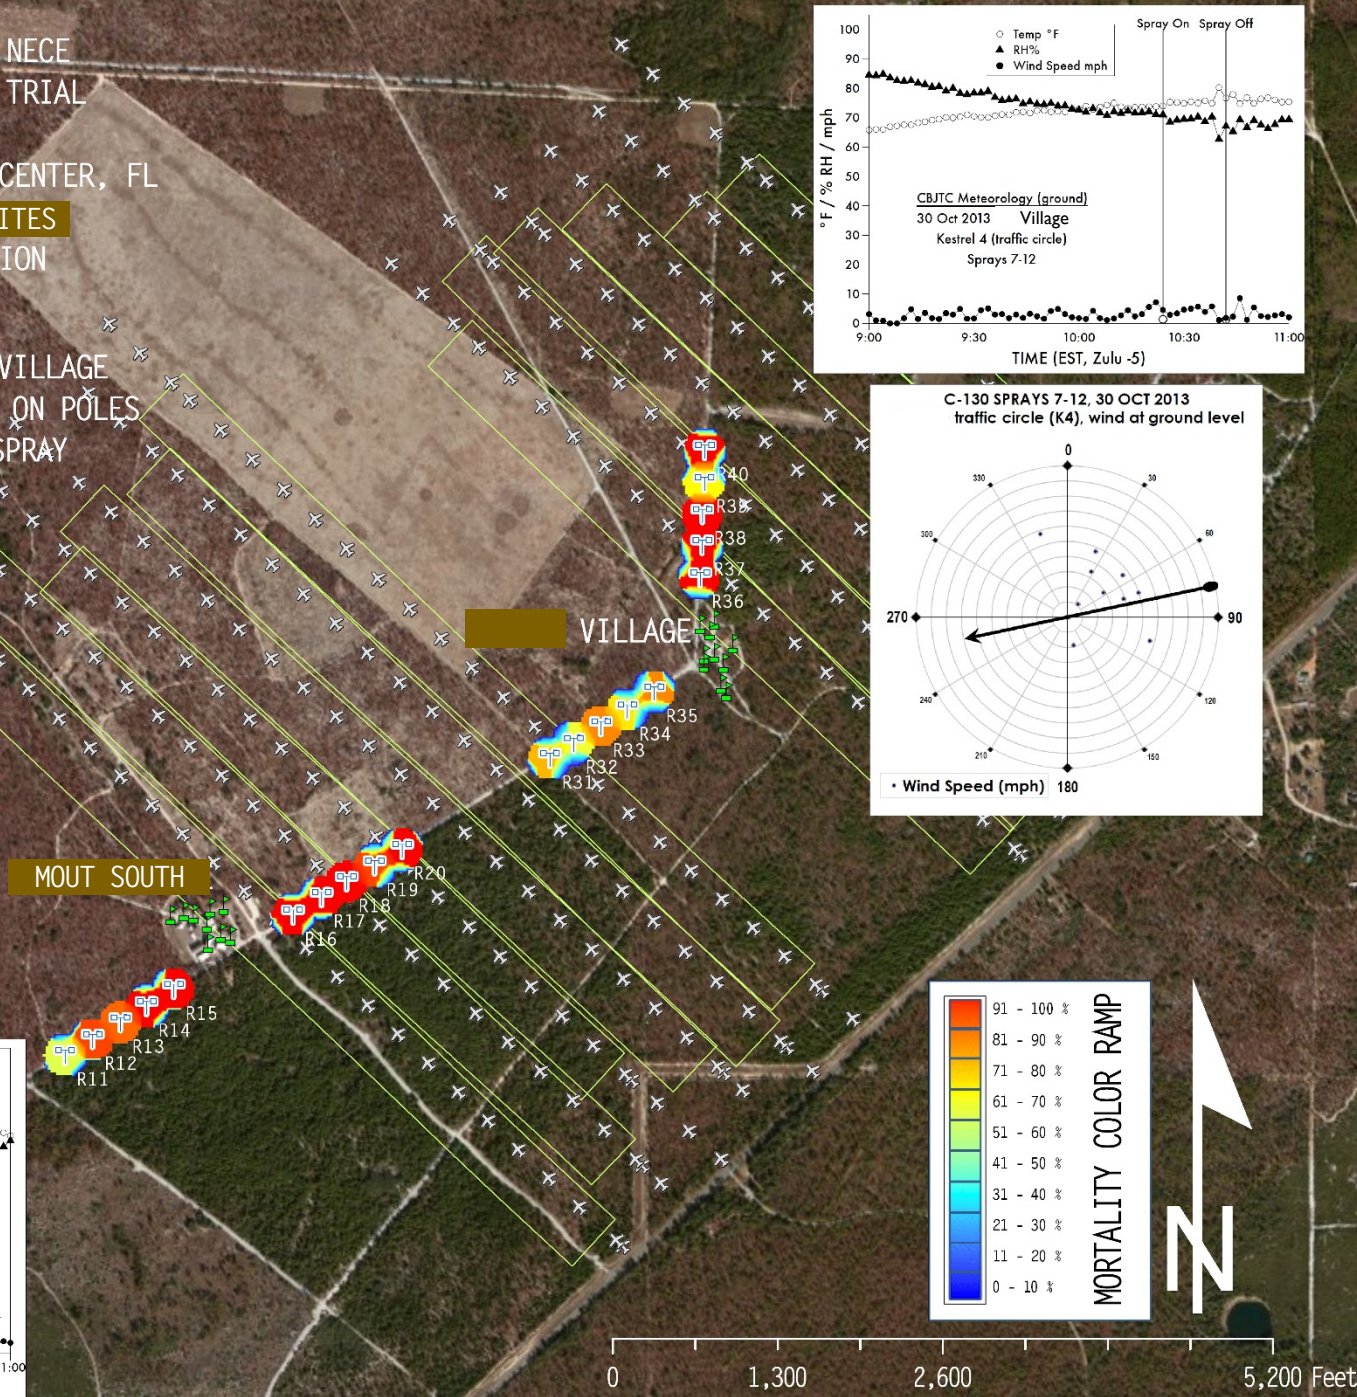

**Figure S6I**  
 30 October 2013  
 8003 nozzles  
 Road Transects  
 4 hr mortality

USAF / USDA-ARS-CMAVE / NECE  
 DWFP COLLABORATIVE FIELD TRIAL  
 2013-10-30  
 CAMP BLANDING JOINT TRAINING CENTER, FL

**MOUT SOUTH & VILLAGE SITES**  
**NALED** AERIAL APPLICATION  
 AE. AEGYPTI TARGET

SIX PASSES UPWIND OF EACH VILLAGE  
 SENTINEL MOSQUITOES OUTDOORS ON POLES  
 MORTALITY AT 4 HR POST-SPRAY  
 8003 TEEJET NOZZLES

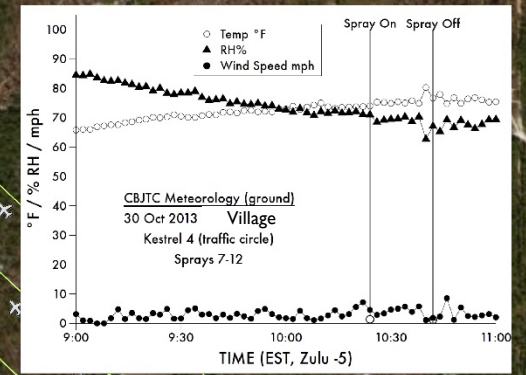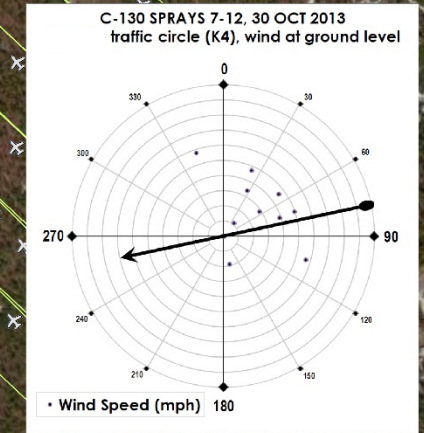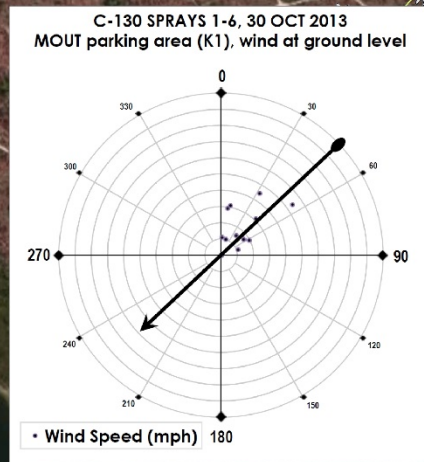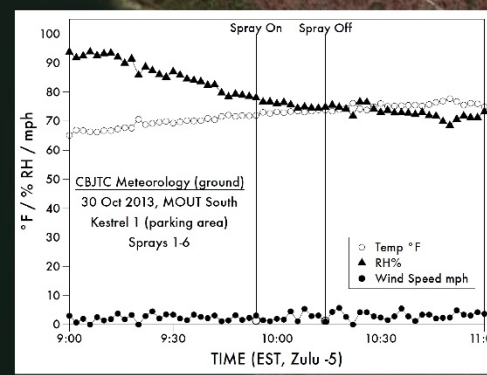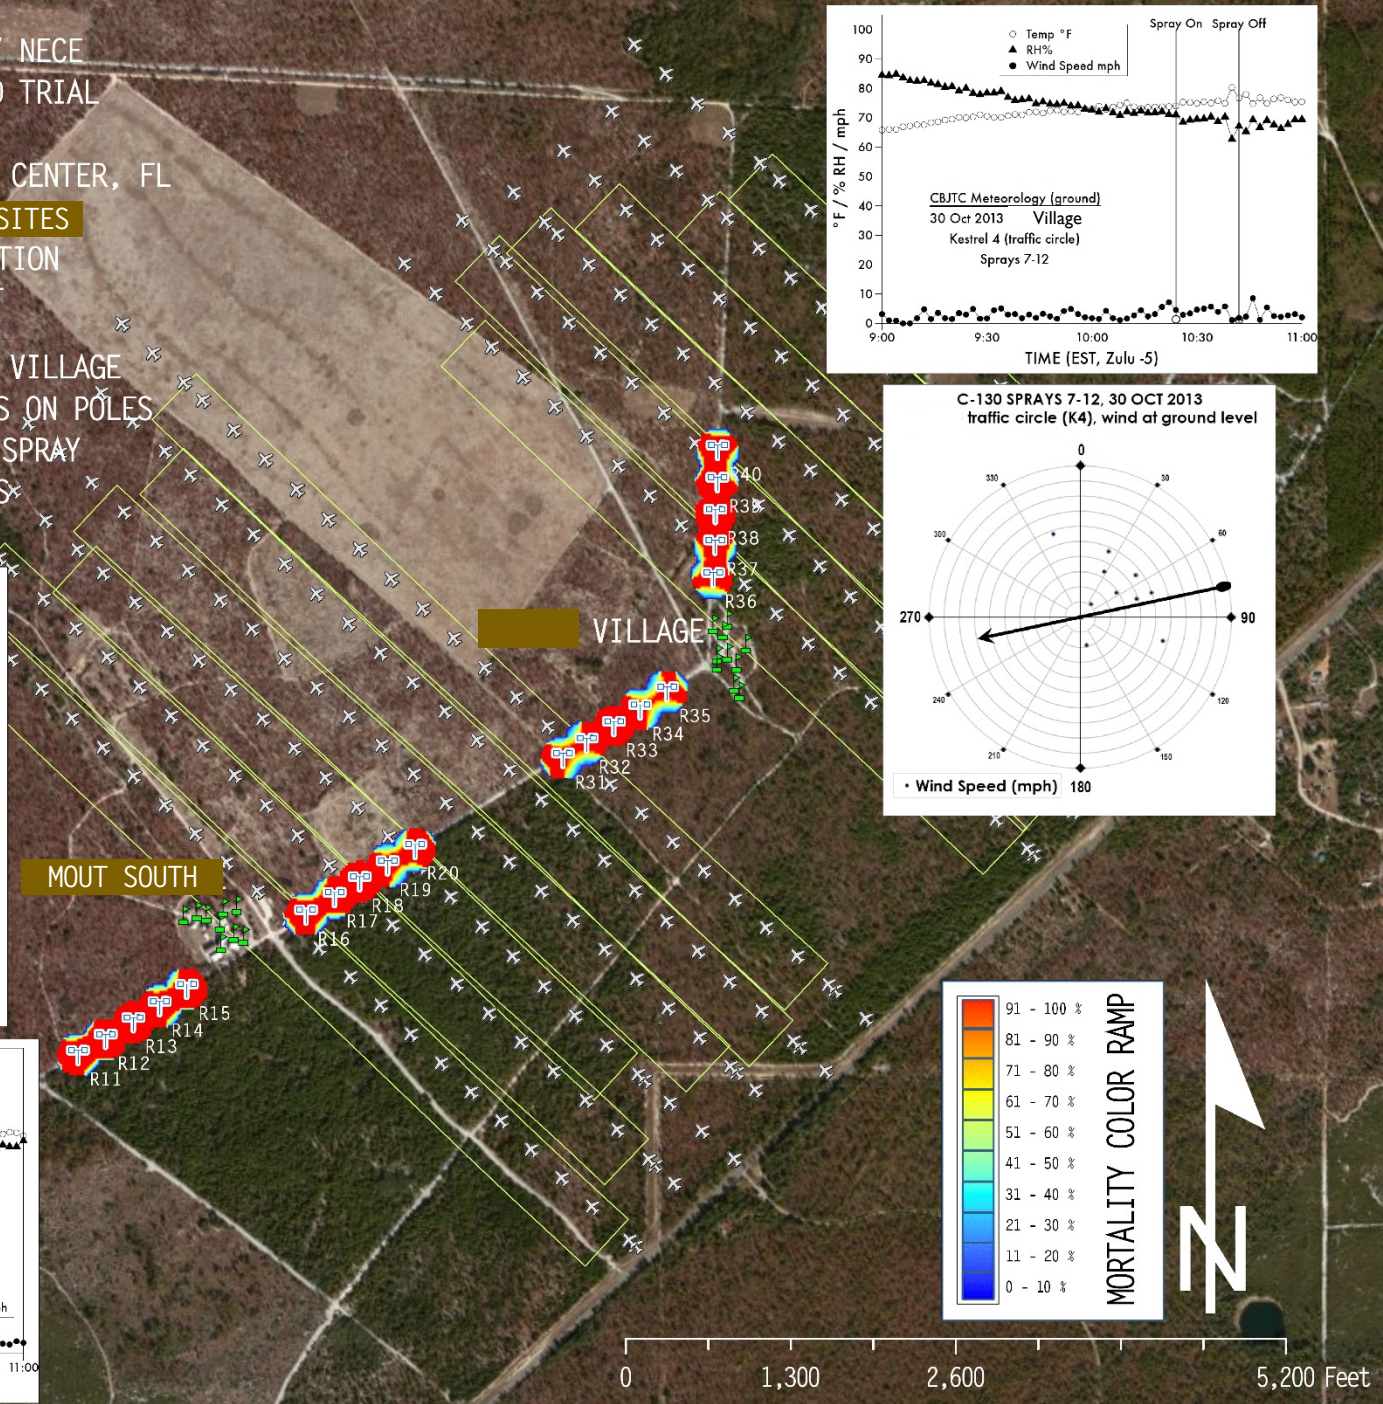

**Figure S62**  
 30 October 2013  
 8003 nozzles  
 Road Transects  
 12 hr mortality

USAF / USDA-ARS-CMAVE / NECE  
 DWFP COLLABORATIVE FIELD TRIAL  
 2013-10-30  
 CAMP BLANDING JOINT TRAINING CENTER, FL

**MOUT SOUTH & VILLAGE SITES**  
**NALED** AERIAL APPLICATION  
 AE. AEGYPTI TARGET

SIX PASSES UPWIND OF EACH VILLAGE  
 SENTINEL MOSQUITOES OUTDOORS ON POLES  
 MORTALITY AT 12 HR POST-SPRAY  
 8003 TEEJET NOZZLES

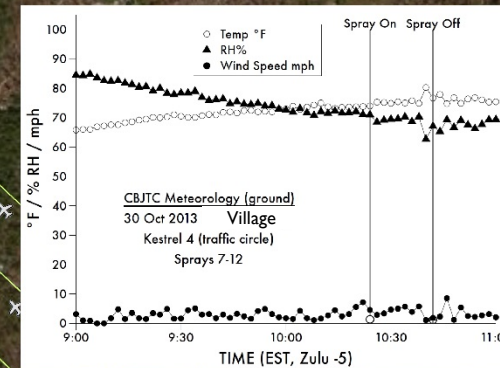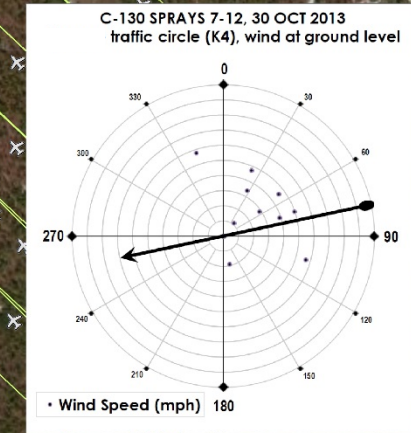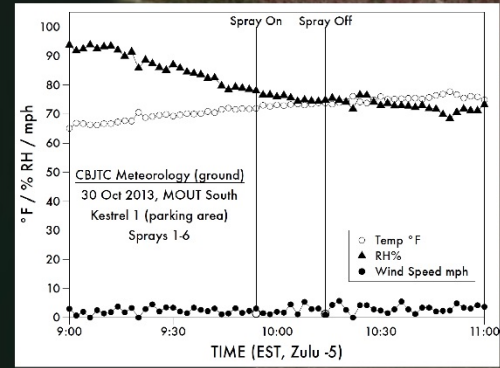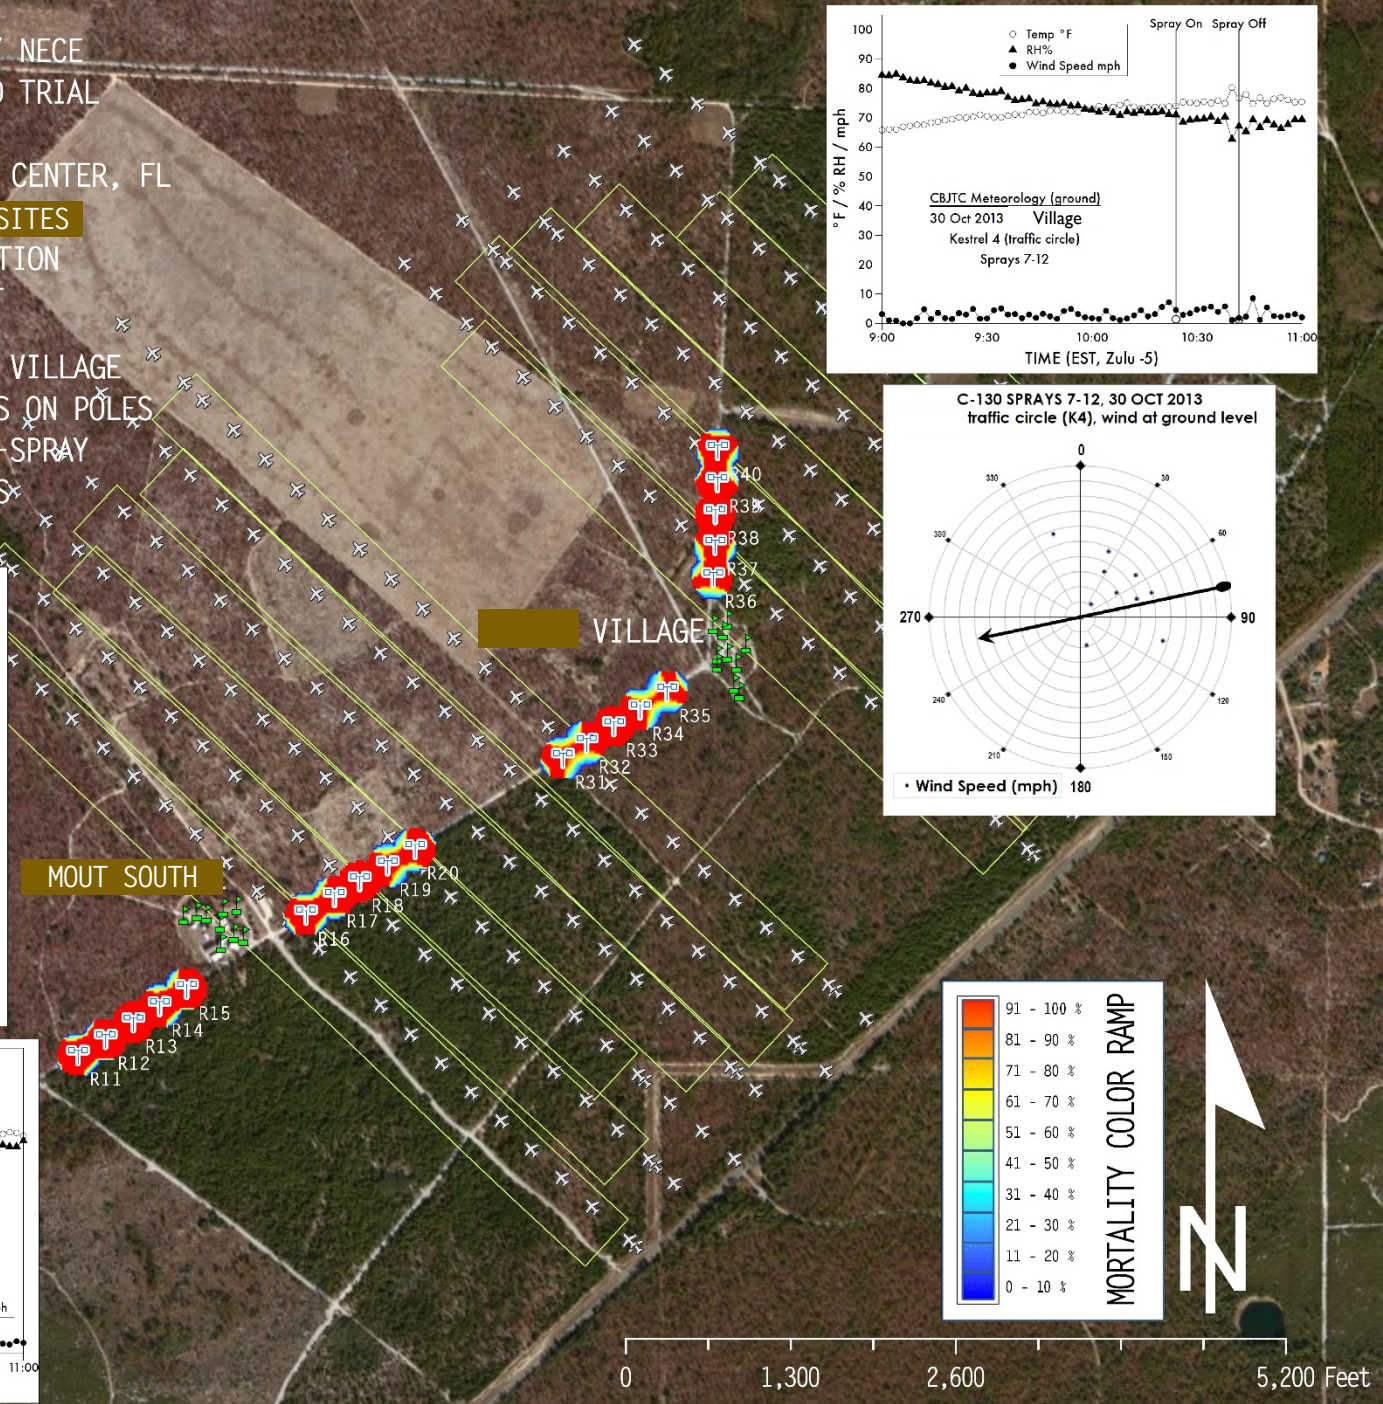

Supplement: pone.0191555.s001.pdf [file pone.0191555.s001.pdf]
