# Supplementary material for: Aerial ULV control of Aedes aegypti with naled (Dibrom) inside simulated rural village and urban cryptic habitats
Source: PubMed Central journal article supplement (PMC5774805; doi:10.1371/journal.pone.0191555), 2018-01-19
Supplement: pone.0191555.s002.pdf [file pone.0191555.s002.pdf]

**Supplementary information for Britch et al. Aerial ULV control of *Aedes aegypti* with naled (Dibrom) inside simulated rural village and urban cryptic habitats.**

**S1 Table. Abbott-corrected sentinel adult *Ae. aegypti* mosquito percent mortality at 1, 4, and 12 hr post-spray following the 29-30 October aerial naled applications over the MOUT South site.** Doors and windows were propped open at all structures unless indicated; Wax Candle and Bread Market structures had no doors or window shutters present and were left open. Percent mortality at 1 hr marked in bold with dagger indicates ants present at time of sentinel cage pickup.

| MOUT South location               | Type                            | Position   | 29 October   |      |       | 30 October   |      |       |
|-----------------------------------|---------------------------------|------------|--------------|------|-------|--------------|------|-------|
|                                   |                                 |            | 1 hr         | 4 hr | 12 hr | 1 hr         | 4 hr | 12 hr |
| <b>Wax Candle</b>                 | outdoors                        | inside box | 5.0          | 4.5  | 8.6   | 0            | 35.2 | 51.2  |
|                                   |                                 | on pole    | 40.0         | 100  | 100   | 100          | 100  | 100   |
|                                   | indoors                         | inside box | 0            | 0    | 13.7  | 0            | 2.6  | 7.3   |
|                                   |                                 | on floor   | 0            | 24.6 | 39.1  | <b>0†</b>    | 100  | 100   |
| <b>Bread Market</b>               | outdoors                        | inside box | 5.0          | 4.5  | 8.6   | 0            | 100  | 100   |
|                                   |                                 | on pole    | 100          | 100  | 100   | 100          | 100  | 100   |
|                                   | indoors                         | inside box | 0            | 0    | 0     | 0            | 79.5 | 79.4  |
|                                   |                                 | on floor   | <b>5.0†</b>  | 79.9 | 84.8  | <b>68.0†</b> | 100  | 100   |
| <b>Bazaar (closed up)</b>         | outdoors                        | inside box | 0            | 74.9 | 89.8  | 0            | 2.6  | 2.1   |
|                                   |                                 | on pole    | 0            | 100  | 100   | 0            | 100  | 100   |
|                                   | indoors                         | inside box | 0            | 24.6 | 69.5  | 0            | 0    | 0     |
|                                   |                                 | on floor   | 0            | 34.7 | 69.5  | 0            | 74.4 | 74.2  |
| <b>Meat Market</b>                | outdoors                        | inside box | 0            | 0    | 3.5   | 0            | 2.6  | 7.3   |
|                                   |                                 | on pole    | 0            | 100  | 100   | 0.0          | 100  | 100   |
|                                   | indoors                         | inside box | 0            | 0    | 0     | 0            | 0    | 2.1   |
|                                   |                                 | on floor   | 0            | 39.7 | 64.5  | 0            | 100  | 100   |
| <b>Bridge</b>                     | surface                         | inside box | <b>95.0†</b> | 95.0 | 94.9  | 0            | 69.2 | 79.4  |
|                                   |                                 | on pole    | 100          | 100  | 100   | 100          | 100  | 100   |
|                                   | underneath                      | inside box | 0            | 89.9 | 94.9  | 0            | 2.8  | 2.4   |
|                                   |                                 | on pole    | 100          | 100  | 100   | 100          | 100  | 100   |
| <b>Holiday Hotel</b>              | outdoors                        | inside box | 10.0         | 59.8 | 64.5  | 0            | 54.4 | 77.1  |
|                                   |                                 | on pole    | 100          | 100  | 100   | 100          | 100  | 100   |
|                                   | indoors (1 <sup>st</sup> floor) | inside box | 0.0          | 4.5  | 3.5   | 0            | 48.7 | 74.2  |
|                                   |                                 | on floor   | 0.0          | 0    | 3.5   | 0            | 100  | 100   |
| indoors (2 <sup>nd</sup> floor)   | inside box                      | 5.0        | 4.5          | 3.5  | 0     | 89.7         | 89.7 |       |
|                                   | on floor                        | 5.3        | 4.8          | 9.1  | 4.1   | 83.8         | 89.2 |       |
| <b>American Hotel (closed up)</b> | outdoors                        | inside box | 5.0          | 49.7 | 74.6  | 0            | 100  | 100   |
|                                   |                                 | on pole    | 90.0         | 100  | 100   | 100          | 100  | 100   |
|                                   | indoors (1 <sup>st</sup> floor) | inside box | 0            | 4.5  | 3.5   | 0            | 12.8 | 27.9  |
|                                   |                                 | on floor   | 0            | 0    | 0     | 0            | 0    | 7.3   |
| indoors (2 <sup>nd</sup> floor)   | inside box                      | 0          | 0            | 0    | 0     | 0            | 63.9 |       |
|                                   | on floor                        | 0          | 27.4         | 60.5 | 0     | 7.7          | 17.6 |       |
| <b>Fruit Market (closed up)</b>   | outdoors                        | inside box | 0            | 0    | 0     | 0            | 100  | 100   |
|                                   |                                 | on pole    | 90.0         | 100  | 100   | 100          | 100  | 100   |
|                                   | indoors                         | inside box | 0.0          | 0    | 23.8  | 0            | 94.3 | 94.3  |
|                                   |                                 | on floor   | 0.0          | 0    | 3.5   | 0            | 94.9 | 100.0 |
| <b>Jose Cantina</b>               | outdoors                        | inside box | 0.0          | 4.5  | 8.6   | 0            | 100  | 100   |
|                                   |                                 | on pole    | 90.0         | 100  | 100   | 100          | 100  | 100   |
|                                   | indoors                         | inside box | 0.0          | 4.5  | 3.5   | 0            | 0    | 22.7  |
|                                   |                                 | on floor   | 0.0          | 0    | 3.5   | 0            | 43.0 | 59.9  |
