# Supplementary material for: Aerial ULV control of Aedes aegypti with naled (Dibrom) inside simulated rural village and urban cryptic habitats
Source: PubMed Central journal article supplement (PMC5774805; doi:10.1371/journal.pone.0191555), 2018-01-19
Supplement: pone.0191555.s003.pdf [file pone.0191555.s003.pdf]

**Supplementary information for Britch et al. Aerial ULV control of *Aedes aegypti* with naled (Dibrom) inside simulated rural village and urban cryptic habitats.**

**S2 Table. Abbott-corrected sentinel adult *Ae. aegypti* mosquito percent mortality at 1, 4, and 12 hr post-spray following the 29-30 October aerial naled applications over the Village site. All structures were unmodified with windows and doors completely open. Percent mortality at 1 hr marked in bold with dagger indicates ants present at time of sentinel cage pickup.**

| Village Location                            | Type                            | Position               | 29 October   |      |       | 30 October   |      |       |
|---------------------------------------------|---------------------------------|------------------------|--------------|------|-------|--------------|------|-------|
|                                             |                                 |                        | 1 hr         | 4 hr | 12 hr | 1 hr         | 4 hr | 12 hr |
| <b>Roundabout</b>                           | outdoors                        | inside box<br>on pole  | 15.0         | 100  | 100   | 13.9         | 74.4 | 74.2  |
|                                             |                                 |                        | 100          | 100  | 100   | 100          | 100  | 100   |
|                                             | outdoors (courtyard)            | inside box<br>on pole  | <b>0.0†</b>  | 19.6 | 69.5  | 0            | 24.4 | 34.9  |
|                                             |                                 |                        | <b>60.0†</b> | 100  | 100   | <b>87.3†</b> | 100  | 100   |
| <b>Main Structure</b>                       | indoors (1 <sup>st</sup> floor) | inside box<br>on floor | <b>0†</b>    | 0    | 0     | 3.8          | 2.6  | 2.1   |
|                                             |                                 |                        | <b>0†</b>    | 29.6 | 54.3  | 0            | 65.8 | 65.7  |
|                                             | indoors (2 <sup>nd</sup> floor) | inside box<br>on floor | 0            | 0    | 0     | 0            | 2.6  | 2.1   |
|                                             |                                 |                        | 10.0         | 74.9 | 94.9  | 8.9          | 100  | 100   |
| <b>Building #1 residence</b>                | outdoors                        | inside box<br>on pole  | <b>95.0†</b> | 95.0 | 94.9  | 0            | 0    | 0     |
|                                             |                                 |                        | 75.0         | 100  | 100   | 89.3         | 100  | 100   |
|                                             | indoors                         | inside box<br>on floor | 0            | 0    | 0     | 0            | 0    | 0     |
|                                             |                                 |                        | 0            | 68.3 | 78.6  | 0            | 89.7 | 94.8  |
| <b>Building #2 residence</b>                | outdoors                        | inside box<br>on pole  | <b>50.0†</b> | 49.7 | 59.4  | 0            | 0    | 0     |
|                                             |                                 |                        | 95.0         | 100  | 100   | 60.6         | 88.6 | 100   |
|                                             | indoors                         | inside box<br>on floor | 0            | 100  | 100   | 0            | 2.6  | 7.3   |
|                                             |                                 |                        | 0            | 84.9 | 100   | 9.4          | 100  | 100   |
| <b>Building #3 residence</b>                | outdoors                        | inside box<br>on pole  | <b>0†</b>    | 0    | 0     | 0            | 0    | 0     |
|                                             |                                 |                        | 100          | 100  | 100   | 94.7         | 100  | 100   |
|                                             | indoors                         | inside box<br>on floor | 0            | 0    | 8.6   | 0            | 0    | 0     |
|                                             |                                 |                        | 0            | 29.6 | 39.1  | 0            | 78.4 | 83.7  |
| <b>Building #4 residence</b>                | outdoors                        | inside box<br>on pole  | 0            | 0    | 13.7  | 0            | 0    | 0     |
|                                             |                                 |                        | 0            | 100  | 100   | 94.4         | 100  | 100   |
|                                             | indoors                         | inside box<br>on floor | 0            | 0    | 8.6   | 0            | 0    | 2.1   |
|                                             |                                 |                        | 25.0         | 89.9 | 94.9  | 8.9          | 84.6 | 94.8  |
| <b>Building #5 residence</b>                | outdoors                        | inside box<br>on pole  | <b>10.0†</b> | 29.6 | 44.1  | <b>84.0†</b> | 94.6 | 94.6  |
|                                             |                                 |                        | 0            | 100  | 100   | <b>100†</b>  | 100  | 100   |
|                                             | indoors                         | inside box<br>on floor | 0            | 0    | 0     | 0            | 7.7  | 27.9  |
|                                             |                                 |                        | 20.0         | 95.0 | 79.7  | 71.9         | 94.3 | 100   |
| <b>Building #6 outdoor market</b>           | outdoors                        | inside box<br>on pole  | <b>95.0†</b> | 84.9 | 84.8  | 0            | 0    | 2.1   |
|                                             |                                 |                        | 68.4         | 100  | 100   | 100          | 100  | 100   |
|                                             | indoors                         | inside box<br>on floor | 0            | 0    | 0     | 0            | 0    | 12.4  |
|                                             |                                 |                        | 0            | 69.8 | 69.5  | <b>94.7†</b> | 100  | 100   |
| <b>Building #7 outdoor market</b>           | outdoors                        | inside box<br>on pole  | <b>0†</b>    | 100  | 100   | 0            | 12.8 | 17.6  |
|                                             |                                 |                        | 5.0          | 100  | 100   | <b>100†</b>  | 100  | 100   |
|                                             | indoors                         | inside box<br>on floor | 0            | 0    | 13.7  | 0            | 13.6 | 29.5  |
|                                             |                                 |                        | 0            | 29.6 | 44.1  | <b>89.9†</b> | 100  | 100   |
| <b>Building #8 residence with courtyard</b> | outdoors                        | inside box<br>on pole  | 0            | 14.6 | 59.4  | <b>0†</b>    | 0    | 0     |
|                                             |                                 |                        | 80.0         | 100  | 100   | <b>79.7†</b> | 100  | 100   |
|                                             | indoors                         | inside box<br>on floor | 0            | 54.8 | 84.8  | 0            | 0    | 2.4   |
|                                             |                                 |                        | <b>0†</b>    | 54.8 | 74.6  | 68.0         | 100  | 100   |
