# Supplementary material for: Aerial ULV control of Aedes aegypti with naled (Dibrom) inside simulated rural village and urban cryptic habitats
Source: PubMed Central journal article supplement (PMC5774805; doi:10.1371/journal.pone.0191555), 2018-01-19
Supplement: pone.0191555.s004.pdf [file pone.0191555.s004.pdf]

**Supplementary information for Britch et al.** Aerial ULV control of *Aedes aegypti* with naled (Dibrom) inside simulated rural village and urban cryptic habitats.

**S3 Table. Abbott-corrected sentinel adult *Ae. aegypti* mosquito percent mortality at 1, 4, and 12 hr post-spray following the 29-30 October aerial naled applications over the Transect sites.** All Transect sentinels were placed outdoors unprotected in the open at the top of 48-in high poles.

| Road<br>Transect<br>Location | Nearest Area | Description           | Spinner<br>Present? | 29 October |      |       | 30 October |      |       |
|------------------------------|--------------|-----------------------|---------------------|------------|------|-------|------------|------|-------|
|                              |              |                       |                     | 1 hr       | 4 hr | 12 hr | 1 hr       | 4 hr | 12 hr |
| <b>R 20</b>                  | MOUT South   | 1250 ft NE of MOUT    | -                   | 30.0       | 95.0 | 94.9  | 59.5       | 100  | 100   |
| <b>R 19</b>                  | MOUT South   | 1000 ft NE of MOUT    | -                   | 63.2       | 89.4 | 100   | 94.9       | 100  | 100   |
| <b>R 18</b>                  | MOUT South   | 750 ft NE of MOUT     | <b>Yes</b>          | 90.0       | 100  | 100   | 89.9       | 100  | 100   |
| <b>R 17</b>                  | MOUT South   | 500 ft NE of MOUT     | <b>Yes</b>          | 0.0        | 100  | 100   | 100        | 100  | 100   |
| <b>R 16</b>                  | MOUT South   | 250 ft NE of MOUT     | <b>Yes</b>          | 70.0       | 100  | 100   | 100        | 100  | 100   |
| <b>R 15</b>                  | MOUT South   | 250 ft SW of MOUT     | <b>Yes</b>          | 100        | 100  | 100   | 100        | 100  | 100   |
| <b>R 14</b>                  | MOUT South   | 500 ft SW of MOUT     | -                   | 26.3       | 100  | 100   | 100        | 100  | 100   |
| <b>R 13</b>                  | MOUT South   | 750 ft SW of MOUT     | -                   | 35.0       | 100  | 100   | 100        | 100  | 100   |
| <b>R 12</b>                  | MOUT South   | 1000 ft SW of MOUT    | -                   | 0.0        | 100  | 100   | 94.9       | 100  | 100   |
| <b>R 11</b>                  | MOUT South   | 1250 ft SW of MOUT    | -                   | 0.0        | 100  | 100   | 100        | 100  | 100   |
| <b>R 40</b>                  | Village      | 1250 ft N of Village  | -                   | 5.0        | 24.6 | 59.4  | 77.5       | 100  | 100   |
| <b>R 39</b>                  | Village      | 1000 ft N of Village  | -                   | 10.0       | 89.9 | 100   | 62.7       | 100  | 100   |
| <b>R 38</b>                  | Village      | 750 ft N of Village   | -                   | 25.0       | 84.9 | 94.9  | 84.8       | 100  | 100   |
| <b>R 37</b>                  | Village      | 500 ft N of Village   | -                   | 45.0       | 100  | 100   | 69.6       | 100  | 100   |
| <b>R 36</b>                  | Village      | 250 ft N of Village   | -                   | 100        | 100  | 100   | 84.8       | 100  | 100   |
| <b>R 35</b>                  | Village      | 250 ft SW of Village  | <b>Yes</b>          | 40.0       | 100  | 100   | 100        | 100  | 100   |
| <b>R 34</b>                  | Village      | 500 ft SW of Village  | <b>Yes</b>          | 100        | 100  | 100   | 100        | 100  | 100   |
| <b>R 33</b>                  | Village      | 750 ft SW of Village  | <b>Yes</b>          | 100        | 100  | 100   | 100        | 100  | 100   |
| <b>R 32</b>                  | Village      | 1000 ft SW of Village | -                   | 65.0       | 95.0 | 94.9  | 66.2       | 100  | 100   |
| <b>R 31</b>                  | Village      | 1250 ft SW of Village | -                   | 95.0       | 100  | 100   | 100        | 100  | 100   |
