# Supplementary material for: Aerial ULV control of Aedes aegypti with naled (Dibrom) inside simulated rural village and urban cryptic habitats
Source: PubMed Central journal article supplement (PMC5774805; doi:10.1371/journal.pone.0191555), 2018-01-19
Supplement: pone.0191555.s005.pdf [file pone.0191555.s005.pdf]

**Supplementary information for Britch et al.** Aerial ULV control of *Aedes aegypti* with naled (Dibrom) inside simulated rural village and urban cryptic habitats.

**S4 Table. Droplet analysis data from the 29-30 October aerial naled applications over the MOUT South, Village, and Control sites.** The droplet spectrum for each location is partitioned into  $DV_{10}$ ,  $DV_{50}$  (VMD), and  $DV_{90}$ . The symbol  $\rho$  denotes droplet density in droplets per  $mm^2$ .

| Site                            | Location       | Type                            | 29 October |           |           |           | 30 October |           |           |           |
|---------------------------------|----------------|---------------------------------|------------|-----------|-----------|-----------|------------|-----------|-----------|-----------|
|                                 |                |                                 | $\rho$     | $DV_{10}$ | $DV_{50}$ | $DV_{90}$ | $\rho$     | $DV_{10}$ | $DV_{50}$ | $DV_{90}$ |
| MOUT South                      | Wax Candle     | outdoors                        | 47.8       | 3.7       | 5.3       | 7.8       | 64.9       | 4.1       | 5.9       | 9.8       |
|                                 |                | indoors                         | 23.3       | 3.9       | 5.5       | 8.1       | 52.6       | 4.3       | 6.2       | 10.3      |
|                                 | Bread Market   | outdoors                        | 48.9       | 3.8       | 5.7       | 9.5       | 53.4       | 4.7       | 6.8       | 11.8      |
|                                 |                | indoors                         | 18.8       | 4.2       | 5.8       | 10.0      | 35.3       | 4.7       | 6.6       | 12.0      |
|                                 | Bazaar         | outdoors                        | 32.9       | 4.5       | 5.9       | 9.0       | 51.1       | 4.5       | 6.9       | 11.9      |
|                                 |                | indoors                         | 17.7       | 4.1       | 5.7       | 8.0       | 19.7       | 4.2       | 6.1       | 9.1       |
|                                 | Meat Market    | outdoors                        | 24.5       | 4.4       | 6.1       | 9.6       | 70.9       | 4.5       | 6.5       | 11.6      |
|                                 |                | indoors                         | 15.2       | 4.5       | 6.3       | 8.7       | 40.7       | 4.9       | 6.4       | 9.9       |
|                                 | Holiday Hotel  | outdoors                        | 30.9       | 4.0       | 5.9       | 9.2       | 18.8       | 5.0       | 7.1       | 11.6      |
|                                 |                | indoors (1 <sup>st</sup> floor) | 17.8       | 4.5       | 6.2       | 8.9       | 42.8       | 4.8       | 6.6       | 9.8       |
|                                 |                | indoors (2 <sup>nd</sup> floor) | 19.1       | 4.2       | 5.9       | 8.4       | 31.4       | 4.3       | 6.3       | 9.6       |
|                                 |                | outdoors (roof A)               | 33.6       | 4.0       | 5.9       | 9.0       | 81.9       | 4.2       | 6.4       | 11.7      |
|                                 |                | outdoors (roof B)               | 18.8       | 4.4       | 6.4       | 14.2      | 65.8       | 4.0       | 5.9       | 10.6      |
|                                 | American Hotel | outdoors                        | 20.3       | 4.7       | 6.6       | 9.5       | 64.2       | 4.3       | 6.5       | 11.2      |
| indoors (1 <sup>st</sup> floor) |                | 11.3                            | 4.2        | 5.7       | 8.0       | 23.7      | 3.7        | 5.1       | 7.8       |           |
| indoors (2 <sup>nd</sup> floor) |                | 11.2                            | 4.6        | 6.2       | 9.0       | 15.5      | 3.8        | 5.5       | 7.9       |           |
| Fruit Market                    | outdoors       | 33.1                            | 3.8        | 5.3       | 8.4       | 56.7      | 4.5        | 6.7       | 11.3      |           |
|                                 | indoors        | 12.5                            | 3.5        | 5.9       | 8.6       | 19.3      | 4.0        | 5.8       | 8.9       |           |
| Jose Cantina                    | outdoors       | 22.7                            | 3.8        | 5.6       | 10.0      | 37.4      | 4.6        | 6.6       | 11.4      |           |
|                                 | indoors        | 15.0                            | 4.2        | 6.0       | 9.5       | 32.7      | 4.1        | 5.9       | 9.1       |           |
| Village                         | Traffic Circle | outdoors                        | 23.2       | 4.1       | 6.5       | 9.5       | 51.7       | 4.4       | 6.7       | 11.8      |
|                                 | Main Structure | indoors (1 <sup>st</sup> floor) | 10.9       | 4.6       | 6.5       | 9.6       | 46.0       | 3.9       | 5.8       | 9.9       |
|                                 |                | indoors (2 <sup>nd</sup> floor) | 11.2       | 4.4       | 5.9       | 9.3       | 26.7       | 4.6       | 6.8       | 10.3      |
|                                 |                | outdoors (roof)                 | 24.8       | 4.0       | 5.5       | 7.9       | 44.0       | 4.3       | 6.4       | 10.9      |
|                                 | Building #2    | outdoors                        | 16.0       | 4.1       | 5.7       | 10.1      | 34.2       | 4.5       | 6.9       | 11.8      |
|                                 |                | indoors                         | 8.3        | 4.0       | 5.6       | 9.6       | 24.0       | 4.1       | 6.1       | 9.9       |
|                                 | Building #3    | outdoors                        | 19.0       | 4.0       | 5.6       | 9.3       | 34.9       | 4.3       | 6.5       | 11.0      |
|                                 |                | indoors                         | 12.0       | 4.4       | 5.9       | 8.3       | 21.6       | 4.4       | 6.7       | 10.8      |
|                                 | Building #4    | outdoors                        | 23.4       | 4.0       | 5.7       | 9.2       | 35.9       | 3.9       | 6.0       | 10.0      |
|                                 |                | indoors                         | 10.6       | 4.0       | 5.8       | 9.2       | 33.3       | 4.2       | 6.4       | 11.5      |
|                                 | Building #5    | outdoors                        | 7.7        | 4.7       | 6.5       | 11.6      | 40.8       | 4.4       | 6.7       | 11.8      |
|                                 |                | indoors                         | 11.7       | 3.9       | 5.6       | 8.4       | 23.9       | 4.1       | 6.2       | 9.6       |
|                                 | Building #6    | outdoors                        | 12.6       | 4.3       | 5.9       | 9.2       | 47.2       | 4.1       | 6.3       | 11.6      |
|                                 |                | indoors                         | 3.4        | 4.6       | 6.5       | 9.7       | 31.4       | 4.3       | 6.6       | 11.6      |
| Building #7                     | outdoors       | 15.4                            | 3.8        | 5.4       | 8.1       | 5.9       | 4.4        | 7.4       | 12.8      |           |
|                                 | indoors        | 15.3                            | 3.8        | 5.3       | 7.8       | 13.1      | 5.1        | 8.4       | 15.4      |           |
| Building #8                     | outdoors       | 10.0                            | 4.2        | 6.0       | 11.9      | 38.0      | 4.3        | 6.3       | 9.9       |           |
|                                 | indoors        | 12.1                            | 4.1        | 5.8       | 8.2       | 22.6      | 4.3        | 6.7       | 11.5      |           |
| Control                         | Spinner 1      | outdoors                        | 19.1       | 4.3       | 6.0       | 14.1      | 33.2       | 4.3       | 6.4       | 9.8       |
|                                 | Spinner 2      | outdoors                        | 19.3       | 4.2       | 5.7       | 7.5       | 24.5       | 4.2       | 6.3       | 10.5      |
