# Supplementary material for: Aerial ULV control of Aedes aegypti with naled (Dibrom) inside simulated rural village and urban cryptic habitats
Source: PubMed Central journal article supplement (PMC5774805; doi:10.1371/journal.pone.0191555), 2018-01-19
Supplement: pone.0191555.s006.pdf [file pone.0191555.s006.pdf]

**Supplementary information for Britch et al.** Aerial ULV control of *Aedes aegypti* with naled (Dibrom) inside simulated rural village and urban cryptic habitats.

**S5 Table. Droplet analysis data from the 29-30 October aerial naled applications over the Transect and Control sites (all outdoors, unprotected).** The droplet spectrum for each location is partitioned into  $DV_{10}$ ,  $DV_{50}$  (VMD), and  $DV_{90}$ . The symbol  $\rho$  denotes droplet density in droplets per  $mm^2$ .

| Site                                  | Location  | Description         | 29 October |           |           |           | 30 October |           |           |           |
|---------------------------------------|-----------|---------------------|------------|-----------|-----------|-----------|------------|-----------|-----------|-----------|
|                                       |           |                     | $\rho$     | $DV_{10}$ | $DV_{50}$ | $DV_{90}$ | $\rho$     | $DV_{10}$ | $DV_{50}$ | $DV_{90}$ |
| Road transects adjacent to MOUT South | R18       | 750 ft E of MOUT    | 20.4       | 3.9       | 5.8       | 8.8       | 29.3       | 4.5       | 6.6       | 11.5      |
|                                       | R17       | 500 ft E of MOUT    | 12.1       | 4.0       | 6.1       | 8.7       | 45.6       | 4.0       | 6.1       | 10.0      |
|                                       | R16       | 250 ft E of MOUT    | 16.9       | 3.8       | 5.2       | 7.1       | 25.8       | 4.4       | 6.6       | 11.0      |
|                                       | R16A      | 0 ft E of MOUT      | 21.5       | 4.0       | 5.4       | 8.8       | 34.0       | 3.8       | 6.2       | 11.3      |
|                                       | R15A      | 0 ft W of MOUT      | 10.4       | 4.4       | 6.4       | 10.6      | 28.9       | 4.0       | 6.3       | 11.6      |
|                                       | R15       | 250 ft W of MOUT    | 18.6       | 4.0       | 5.7       | 8.4       | 30.2       | 4.1       | 6.3       | 11.5      |
| Road transects adjacent to Village    | R35A      | 0 ft W of Village   | 21.0       | 4.0       | 5.8       | 8.7       | 36.0       | 4.0       | 6.4       | 11.2      |
|                                       | R35       | 250 ft W of Village | 15.1       | 3.8       | 5.6       | 8.7       | 36.6       | 4.2       | 6.4       | 11.8      |
|                                       | R34       | 500 ft W of Village | 16.4       | 4.3       | 6.1       | 9.9       | 35.6       | 4.5       | 6.9       | 12.9      |
|                                       | R33       | 750 ft W of Village | 14.9       | 3.7       | 5.7       | 8.3       | 42.5       | 4.2       | 6.5       | 11.4      |
| Control                               | Spinner 1 | -                   | 19.1       | 4.3       | 6.0       | 14.1      | 33.2       | 4.3       | 6.4       | 9.8       |
|                                       | Spinner 2 | -                   | 19.3       | 4.2       | 5.7       | 7.5       | 24.5       | 4.2       | 6.3       | 10.5      |
